# Supplementary material for: A simple method of equine limb force vector analysis and its potential applications
Source: PeerJ. 2018 Feb 21;6:e4399. doi: 10.7717/peerj.4399 (PMC5827015; doi:10.7717/peerj.4399)
Supplement: Supplemental Information 3 [file peerj-06-4399-s004.xlsx]

## Sheet: Sign convention
	Positive
Vertical	Up
A-P	Forwards (propulsion)
M-L Left limb	Lateral
M-L Right limb	Medial

## Sheet: Stats
Number	Horse			Mass (kg)	Height (m)
1	H4		4599	468.807	1.5
2	H5		4628	471.764	1.48
3	H7		4520	460.754	1.53
4	H8		4931	502.65	1.53
5	H9		3974	405.097	1.44
6	H10		4609	469.827	1.49
7	H11		5038	513.558	1.62
8	H12		4882	497.655	1.5
9	H13		4028	410.601	1.37
10	H20		4169	424.975	1.45
				462.569	1.491
				38.0553	0.0657352

## Sheet: LFGRF
	LFGRF_Z	LFGRF_Z	LFGRF_Z	LFGRF_Z	LFGRF_Z	LFGRF_Z	LFGRF_Z	LFGRF_Z	LFGRF_Z				LFGRF_Z	LFGRF_Z	LFGRF_Z	LFGRF_Z	LFGRF_Z	LFGRF_Z	LFGRF_Z	LFGRF_Z	LFGRF_Z				LFGRF_Z	LFGRF_Z	LFGRF_Z	LFGRF_Z	LFGRF_Z	LFGRF_Z	LFGRF_Z	LFGRF_Z	LFGRF_Z				LFGRF_Z	LFGRF_Z	LFGRF_Z	LFGRF_Z	LFGRF_Z	LFGRF_Z	LFGRF_Z	LFGRF_Z	LFGRF_Z				LFGRF_Z
	LINK_MODEL_BASED	LINK_MODEL_BASED	LINK_MODEL_BASED	LINK_MODEL_BASED	LINK_MODEL_BASED	LINK_MODEL_BASED	LINK_MODEL_BASED	LINK_MODEL_BASED	LINK_MODEL_BASED				LINK_MODEL_BASED	LINK_MODEL_BASED	LINK_MODEL_BASED	LINK_MODEL_BASED	LINK_MODEL_BASED	LINK_MODEL_BASED	LINK_MODEL_BASED	LINK_MODEL_BASED	LINK_MODEL_BASED				LINK_MODEL_BASED	LINK_MODEL_BASED	LINK_MODEL_BASED	LINK_MODEL_BASED	LINK_MODEL_BASED	LINK_MODEL_BASED	LINK_MODEL_BASED	LINK_MODEL_BASED	LINK_MODEL_BASED				LINK_MODEL_BASED	LINK_MODEL_BASED	LINK_MODEL_BASED	LINK_MODEL_BASED	LINK_MODEL_BASED	LINK_MODEL_BASED	LINK_MODEL_BASED	LINK_MODEL_BASED	LINK_MODEL_BASED				LINK_MODEL_BASED
	PROCESSED	PROCESSED	PROCESSED	PROCESSED	PROCESSED	PROCESSED	PROCESSED	PROCESSED	PROCESSED				PROCESSED	PROCESSED	PROCESSED	PROCESSED	PROCESSED	PROCESSED	PROCESSED	PROCESSED	PROCESSED				PROCESSED	PROCESSED	PROCESSED	PROCESSED	PROCESSED	PROCESSED	PROCESSED	PROCESSED	PROCESSED				PROCESSED	PROCESSED	PROCESSED	PROCESSED	PROCESSED	PROCESSED	PROCESSED	PROCESSED	PROCESSED				PROCESSED
ITEM	X	Y	Z	X	Y	Z	X	Y	Z	Horse 2			X	Y	Z	X	Y	Z	X	Y	Z	Horse 10			X	Y	Z	X	Y	Z	X	Y	Z	Horse 7			X	Y	Z	X	Y	Z	X	Y	Z	Horse 5			X
1	-341.797	97.6562	478.516	0	0	0	0	0	0	0.241503	-0.0690009	0.338104	-9.76562	102.539	136.719	-214.844	4.88281	341.797	48.8281	0	185.547	-0.199154	-0.0765977	0.520865	34.1797	9.76562	263.672	-117.188	4.88281	439.453	454.102	-19.5312	1240.23	-0.39299	0.00950782	1.26137	429.759	102.877	833.159	28.2194	57.0551	236.02	-136.311	-80.3465	341.327	-0.48901	-0.197713	1.16063	-175.781
2	381.825	169.718	953.906	250.974	97.3144	307.108	-402.961	58.7379	502.613	-0.731836	-0.147174	1.24612	123.889	78.5981	364.041	-234.144	6.37557	578.458	125.49	1.56156	247.943	-0.379256	-0.0578733	0.933736	128.476	11.5147	484.202	-131.489	4.33376	573.974	447.694	-54.0743	1279.35	-0.459318	0.030437	1.51721	315.04	67.9781	824.378	73.2815	30.121	321.286	-82.2711	-48.7942	386.78	-0.387226	-0.120871	1.26097	-436.072
3	1279.06	218.801	1466.1	534.392	190.193	698.172	-898.179	129.025	1156.48	-1.91596	-0.197817	2.34634	280.279	23.3315	639.722	-223.64	7.91847	819.156	220.896	4.92023	330.889	-0.568517	-0.0159486	1.40382	244.79	11.2702	735.389	-141.621	3.87655	695.612	360.693	-95.9664	1112.08	-0.48492	0.0574897	1.65063	124.352	7.09656	718.516	136.129	-13.526	429.963	-10.6273	6.9953	427.389	-0.223081	0.0110466	1.2967	-710.409
4	1830.13	192.933	1829.22	675.02	191.277	1009.25	-1293.82	180.769	1762.92	-2.68424	-0.143745	3.25121	364.115	-36.9047	874.16	-214.871	10.1498	995.195	309.017	10.782	475.061	-0.696515	0.0284506	1.83887	339.132	9.13659	964.224	-180.624	6.18449	858.839	296.73	-130.907	986.92	-0.529954	0.0830513	1.82387	5.47394	-47.2206	686.13	209.741	-52.3144	597.115	10.092	62.6022	532.964	-0.168785	0.133414	1.49446	-857.602
5	1657.52	61.3638	1908.35	570.521	52.6629	1133.11	-1402.56	184.66	2127.61	-2.56527	0.0499073	3.65231	328.253	-82.1074	1012.63	-224.745	13.066	1069.11	370.185	19.1706	691.73	-0.724109	0.0596136	2.1754	380.917	5.97749	1130.16	-247.216	9.80487	1055.56	297.551	-147.957	1025.78	-0.600831	0.0985185	2.08447	75.0694	-67.7656	861.795	286.681	-68.2315	845.943	-72.5928	96.9032	755.193	-0.357398	0.191642	2.02662	-804.146
6	1006.94	-113.665	1791.83	363.121	-141.178	1152.78	-1186.1	137.307	2199.32	-1.8061	0.27708	3.63454	226.513	-105.596	1073.52	-231.782	14.9802	1085.4	401.428	28.3192	915.023	-0.674333	0.0723632	2.41108	367.666	4.24819	1218.76	-291.653	7.45936	1189.35	299.235	-141.92	1134.36	-0.622166	0.0941998	2.2993	268.093	-58.5103	1169.98	357.099	-64.0492	1130.36	-217.441	108.025	1039.93	-0.693359	0.189736	2.74854	-654.152
7	294.741	-244.455	1629.14	246.176	-278.094	1191.06	-785.709	66.5475	2099.28	-0.937353	0.416237	3.47595	124.501	-102.681	1084.65	-208.588	13.9487	1101.63	402.49	36.1786	1067.12	-0.57696	0.0631026	2.55183	301.027	6.52867	1220.29	-267.401	-7.0388	1173.39	233.394	-109.265	1204.12	-0.520437	0.062114	2.33521	453.729	-34.712	1459.12	410.273	-50.0622	1379.2	-349.287	101.06	1294.71	-0.998354	0.152914	3.40086	-539.662
8	-134.367	-262.381	1546.86	326.146	-286.821	1321.41	-353.363	2.08123	1959.01	-0.38518	0.389519	3.4108	59.6483	-78.1395	1080.35	-154.629	9.4281	1157.82	374.309	41.3912	1118.5	-0.461664	0.036219	2.63284	200.458	13.1015	1167.2	-190.423	-25.9442	1069.05	121.321	-63.3828	1231.74	-0.332453	0.0157964	2.25095	514.7	-10.504	1594.49	435.736	-35.6923	1528.67	-400.59	81.1644	1437.03	-1.11169	0.104799	3.75235	-518.491
9	-279.586	-190.358	1561.77	464.239	-211.499	1477.87	-25.3547	-30.9228	1894.13	-0.148385	0.26209	3.48605	36.8117	-47.6976	1102.49	-116.694	3.34273	1263.13	319.919	43.8168	1124.76	-0.371335	0.00566588	2.73771	106.01	21.593	1140.73	-110.035	-34.0806	1016.73	54.3308	-30.8756	1296.04	-0.175492	-0.0160956	2.24156	452.337	9.89749	1589.23	425.281	-22.671	1579.35	-370.55	53.9324	1471.37	-1.02705	0.0548888	3.81798	-517.683
10	-243.16	-78.7311	1657.74	479.049	-116.42	1570.31	158.752	-35.2473	1922.14	-0.0545034	0.112983	3.63896	58.3729	-26.6718	1189.77	-144.948	-2.16661	1422.87	243.048	43.4673	1149.29	-0.350114	-0.0148732	2.95071	56.4848	29.5681	1217.91	-67.5177	-23.2813	1111.82	104.737	-32.7845	1459.22	-0.148467	-0.0130235	2.45929	329.05	27.3829	1532.55	371.865	-8.77049	1565.01	-292.736	25.1864	1446.98	-0.817624	0.0054094	3.73948	-453.121
11	-115.986	27.1371	1818.18	289.42	-48.6165	1563.93	196.257	-24.3276	2023.14	0.0161259	-0.00201245	3.81918	119.016	-18.5341	1339.44	-241.992	-6.10194	1620.7	163.372	41.2812	1226.39	-0.411303	-0.022628	3.28375	62.8494	35.5969	1394.93	-79.7146	-6.09355	1315.66	229.167	-57.3752	1679.24	-0.241278	0.0101805	2.84929	206.156	42.5045	1510.9	271.005	7.73349	1520.58	-200.611	0.727159	1412.87	-0.557704	-0.0407399	3.65702	-311.792
12	70.8181	108.11	2024.23	53.1951	-13.9677	1555.92	84.8391	-11.5537	2177.19	-0.0276792	-0.0746812	4.06795	208.461	-19.1151	1521.96	-353.105	-8.84252	1814.13	119.783	39.3133	1355.34	-0.534423	-0.0227784	3.67978	118.111	38.8976	1615.84	-157.646	1.62997	1565.53	344.5	-81.6475	1878.21	-0.402588	0.0288055	3.284	123.36	50.6496	1564.17	152.861	21.2849	1493.36	-122.376	-13.9649	1409.11	-0.327985	-0.0706823	3.67537	-166.371
13	305.725	153.645	2256.22	-37.6723	-12.3144	1662.22	-151.313	-4.55731	2367.14	-0.29631	-0.10308	4.44119	313.732	-24.2407	1708.76	-422.742	-10.8456	1961.4	149.389	39.5511	1532.24	-0.694836	-0.0205157	4.08056	211.064	39.1259	1828.37	-276.31	-3.87362	1806.25	395.727	-89.7386	2007.82	-0.573192	0.0303368	3.66232	104.786	43.4836	1698.76	72.5576	21.081	1539.55	-82.4414	-13.64	1469.4	-0.213764	-0.0643506	3.87373	-91.7499
14	570.291	156.881	2494.58	103.628	-38.4491	1929.43	-441.298	-0.825328	2580.72	-0.787977	-0.0842637	4.94932	407.248	-30.4232	1879.05	-438.878	-12.4998	2059.18	240.121	41.7303	1734.82	-0.852009	-0.0186732	4.44972	308.596	38.3225	2005.68	-372.125	-13.4179	1990.79	392.59	-82.226	2087.81	-0.696651	0.0197872	3.94911	172.361	13.2136	1918.83	83.3621	-3.14432	1712.53	-103.824	6.55225	1625.29	-0.295853	-0.00289399	4.32543	-114.317
15	806.079	132.171	2720.19	351.259	-76.9537	2263.9	-709.461	3.18817	2806.15	-1.31902	-0.036762	5.50434	456.365	-34.4154	2014.77	-425.596	-14.1374	2135.98	339.104	43.7186	1925.62	-0.957756	-0.0183859	4.76607	369.997	39.3563	2129.75	-391.284	-18.525	2084.05	354.089	-62.2124	2147.18	-0.72395	0.00281112	4.1287	305.379	-33.6026	2193.84	183.105	-46.6454	1996.18	-179.454	42.3895	1862.66	-0.549612	0.100912	4.98044	-220.218
16	940.334	101.459	2914.04	554.577	-111.273	2555.74	-885.661	10.7305	3031.78	-1.68204	0.0145156	6.00694	445.265	-34.5348	2109.07	-406.86	-16.0366	2219.46	396.921	43.5578	2070.59	-0.979702	-0.0196557	5.01922	371.775	43.8714	2196.73	-355.452	-19.4078	2125.78	303.934	-38.2639	2207.88	-0.669293	-0.0162366	4.23866	440.497	-76.0564	2458.62	314.182	-89.6646	2304.89	-272.177	80.5768	2121.7	-0.844947	0.202666	5.66549	-391.868
17	916.634	83.3521	3061.53	631.292	-132.543	2747.74	-953.898	22.1152	3246.9	-1.76771	0.0503828	6.3988	406.539	-33.5998	2187.38	-394.683	-17.9643	2319	410.262	41.5563	2174.14	-0.950241	-0.0203313	5.23994	339.985	49.9861	2243.46	-316.223	-19.7286	2185.32	270.712	-24.6067	2284.6	-0.601634	-0.0292781	4.35744	513.507	-92.9625	2647.5	417.266	-112.095	2551.16	-343.978	107.594	2341.34	-1.04893	0.257264	6.20427	-587.007
18	782.215	75.21	3175.79	616.845	-145.15	2873.44	-928.909	35.9909	3441.39	-1.64487	0.0748472	6.70578	381.061	-35.192	2280.58	-394.299	-19.3976	2433.63	401.987	39.3096	2262.47	-0.923465	-0.0184444	5.47223	309.286	55.2064	2313.66	-307.457	-21.6068	2302.61	278.504	-33.3758	2389.3	-0.581075	-0.0281939	4.54708	504.859	-78.8765	2741.45	464.192	-107.528	2698.45	-377.173	117.557	2493.85	-1.10774	0.250114	6.52827	-749.372
19	624.812	66.0946	3280.81	558.147	-154.733	2975.14	-825.798	50.9865	3605.12	-1.41932	0.0986549	6.96752	387.442	-40.4248	2401.91	-409.208	-19.9196	2561.32	393.133	38.2079	2358.99	-0.933219	-0.0138853	5.74327	299.198	58.095	2426.63	-324.428	-23.8013	2453.65	314.514	-58.3849	2515.32	-0.608916	-0.0152605	4.80024	456.979	-50.1949	2786.12	470.037	-88.5682	2780.98	-382.285	115.183	2597.78	-1.07736	0.208959	6.71846	-831.581
20	522.93	47.1806	3397.88	493.335	-164.17	3082.48	-667.657	65.4359	3734.18	-1.18981	0.128896	7.21727	409.794	-46.5867	2537.29	-432.683	-19.7912	2694.22	391.624	38.2862	2468.32	-0.96798	-0.00901285	6.03945	305.782	58.8522	2563.86	-357.218	-24.7319	2606.99	348.663	-84.8568	2647.27	-0.656637	0.000826102	5.07449	416.694	-24.8637	2831.76	453.043	-69.1767	2838.1	-371.906	105.961	2675.06	-1.02168	0.164571	6.8666	-842.07
21	490.079	24.5113	3529.61	447.645	-172.262	3206.46	-498.55	76.8988	3840.92	-1.01483	0.15873	7.47337	429.875	-50.7723	2670.77	-454.102	-19.5312	2822.27	400.391	39.0625	2587.89	-1.00741	-0.00613485	6.33836	323.009	57.8421	2704.2	-393.532	-24.4605	2745.87	360.218	-101.77	2773.56	-0.698889	0.0126359	5.33769	411.231	-13.6703	2909.09	429.253	-58.2085	2898.8	-357.181	94.6303	2744.14	-0.985497	0.137012	7.03703	-810.547
22	512.092	10.4622	3670.59	444.633	-177.538	3356.28	-365.935	82.8099	3940.31	-0.93455	0.176561	7.74907	440.532	-52.5119	2795.8	-465.6	-19.5234	2938.09	420.245	40.1881	2714.55	-1.04036	-0.00564712	6.62662	343.63	55.8424	2837.23	-419.141	-24.3853	2865.42	358.125	-110.058	2894.73	-0.727537	0.0193621	5.58027	429.755	-13.4974	3010.87	410.43	-54.6006	2972.02	-346.453	84.4734	2816.73	-0.976423	0.125543	7.24076	-765.19
23	573.61	15.5032	3815.49	484.525	-180.307	3528.31	-314.621	80.805	4046.77	-0.969946	0.173539	8.04822	444.195	-53.4424	2913.95	-470.374	-19.6084	3045.19	443.579	41.8503	2842.75	-1.06528	-0.00628759	6.90385	359.342	53.9879	2961.82	-423.978	-25.619	2963.91	356.963	-112.98	3013.64	-0.74012	0.0216616	5.80226	457.056	-19.6315	3125.5	407.839	-56.1508	3064.39	-347.734	78.6024	2903.75	-0.997811	0.127035	7.48269	-727.901
24	650.939	35.2812	3959.6	538.159	-183.12	3702.79	-344.931	71.9054	4165.05	-1.0839	0.155264	8.3569	443.586	-55.0538	3026.98	-474.381	-19.4914	3149.79	460.685	44.3694	2966.37	-1.08136	-0.00690783	7.17152	363.183	53.2707	3077.48	-417.729	-27.7547	3052.54	363.358	-113.18	3131.15	-0.742708	0.0208702	6.01112	480.819	-27.9784	3242.67	426.445	-60.9622	3177.23	-364.359	78.8529	3010.55	-1.04635	0.138069	7.75984	-718.991
25	716.516	58.57	4098.48	575.235	-188.565	3859.5	-420.271	59.9414	4291.9	-1.20966	0.134203	8.65538	441.207	-57.1194	3136.08	-481.324	-19.1138	3256.01	465.684	47.789	3081.91	-1.08886	-0.00767373	7.43104	359.146	53.453	3186.16	-415.732	-29.9475	3146.17	373.001	-112.452	3245.31	-0.745051	0.018856	6.21653	496.708	-36.1546	3355.67	453.805	-67.9803	3297.19	-386.729	83.5329	3127.06	-1.10035	0.154422	8.0474	-747.415
26	746.005	75.1524	4228.18	584.94	-196.375	3993.04	-502.93	48.8281	4423.83	-1.29576	0.120152	8.93459	439.453	-58.5938	3242.19	-488.995	-19.0365	3362.51	462.741	51.4252	3192.73	-1.09119	-0.00930871	7.68472	356.445	53.7109	3291.02	-424.55	-31.7873	3250.53	381.034	-112.373	3354.05	-0.754235	0.0174438	6.42291	501.755	-42.0699	3458.4	474.494	-76.295	3408.44	-403.032	90.3459	3240.55	-1.13494	0.171737	8.31686	-792.338
27	742.619	83.6921	4348.73	577.505	-203.203	4114.05	-562.313	41.6823	4557.11	-1.33007	0.113894	9.19945	439.862	-58.7896	3346.05	-494.238	-19.9136	3467.04	457.622	54.4808	3303.28	-1.09161	-0.0122398	7.93489	361.658	53.4875	3394.52	-436.482	-33.5704	3356.53	385.397	-112.765	3456.43	-0.768195	0.0166858	6.62534	494.795	-44.3515	3547.04	477.243	-85.0015	3499.48	-404.714	97.3943	3341.45	-1.13286	0.186579	8.54773	-828.23
28	723.469	87.3311	4462.2	564.037	-205.714	4233.64	-596.291	38.4265	4687.11	-1.33103	0.110796	9.45598	440.528	-58.4725	3447.78	-495.12	-21.8055	3568.23	453.829	56.5567	3415.06	-1.08985	-0.0156006	8.18172	370.674	53.3089	3496.49	-443.158	-35.6071	3454.51	385.789	-112.34	3552.19	-0.778635	0.0152036	6.81728	481.879	-44.497	3626.9	467.392	-93.2155	3576.28	-396.26	104.374	3432.72	-1.10717	0.1992	8.75174	-841.031
29	704.516	89.0847	4570.54	552.196	-203.931	4356.27	-609.851	38.1846	4808.96	-1.31886	0.108127	9.70526	438.694	-58.7702	3547.32	-491.849	-23.7253	3666.14	450.875	57.9551	3524.32	-1.08353	-0.0179698	8.42228	376.734	53.9685	3596.11	-443.126	-37.6515	3543.41	382.249	-110.3	3641.6	-0.780249	0.0121243	6.99767	470.861	-44.7217	3705.59	454.433	-100.058	3649.17	-385.414	111.378	3520.45	-1.07851	0.210779	8.94865	-836.891
30	689.954	90.4546	4674.67	546.452	-200.986	4480.25	-607.936	40.0783	4917.91	-1.30315	0.106416	9.94342	432.968	-60.6643	3644.41	-484.869	-24.6097	3760.98	447.864	59.0521	3626.89	-1.0712	-0.0180384	8.65329	376.341	55.7285	3692.84	-439.196	-39.1155	3627.42	376.153	-108.049	3727.19	-0.773487	0.00857078	7.17054	467.96	-46.8762	3789.1	446.458	-104.853	3726.79	-378.722	118.428	3609.71	-1.06406	0.222298	9.15469	-823.948
31	677.525	92.1132	4774.99	550.659	-200.009	4603.61	-594.059	43.152	5013.48	-1.28754	0.106726	10.169	424.821	-64.8297	3738.42	-475.066	-24.3897	3852.36	443.873	60.306	3721.55	-1.05399	-0.0155822	8.87295	372.837	57.7365	3786.81	-433.824	-39.5997	3709.95	369.238	-107.578	3812.11	-0.763237	0.00664786	7.34021	469.851	-50.6829	3874.14	443.372	-108.103	3807.94	-375.74	125.109	3699.6	-1.06062	0.233602	9.3654	-808.03
32	665.067	94.6549	4871.87	560.903	-202.249	4723.39	-570.008	46.357	5100.34	-1.26898	0.108777	10.3834	416.029	-71.8396	3828.68	-463.858	-24.1935	3939.13	437.943	62.2745	3810.59	-1.03365	-0.011474	9.08164	370.319	59.0207	3878.21	-428.047	-39.3666	3791.37	362.413	-109.973	3897.31	-0.753423	0.00751963	7.50769	469.756	-55.0939	3954.04	442.113	-110.736	3887.85	-373.493	130.853	3787.07	-1.05766	0.244125	9.56887	-792.186
33	652.077	97.949	4965.88	567.103	-207.463	4835.82	-537.47	48.6389	5183.46	-1.24119	0.111746	10.588	406.748	-80.3545	3914.84	-452.614	-25.1466	4020.12	429.174	65.4609	3896.42	-1.01068	-0.00804201	9.28008	369.595	59.2453	3967.18	-422.576	-38.8224	3871.36	355.081	-114.649	3979.75	-0.744643	0.0107626	7.67086	461.653	-59.1227	4022.82	439.764	-113.574	3962.03	-369.188	135.168	3869.2	-1.04552	0.253326	9.75409	-779.103
34	639.037	101.433	5057.67	559.826	-215.286	4937.57	-498.475	49.1839	5267.05	-1.19929	0.115197	10.7839	395.26	-86.8238	3996.95	-441.312	-27.1241	4094.53	417.673	69.3577	3979.74	-0.98378	-0.00757532	9.4682	367.672	58.8096	4053.72	-417.388	-38.451	3948.38	346.499	-120.857	4056.12	-0.734457	0.0153159	7.82659	446.161	-62.3268	4080.59	434.667	-116.48	4028.37	-361.649	138.248	3944.51	-1.02237	0.260888	9.91818	-768.181
35	626.386	104.596	5147.63	539.858	-224.319	5030.49	-457.2	48.6601	5350.74	-1.14707	0.118974	10.9722	379.899	-87.9092	4074.97	-428.78	-28.9637	4161.84	404.381	72.619	4059.84	-0.951477	-0.0107249	9.64501	361.592	58.1618	4137.71	-411.558	-38.8316	4019.33	336.222	-128.012	4125.86	-0.720057	0.0201334	7.97243	427.316	-64.5438	4130.59	425.814	-118.827	4085.97	-350.535	140.64	4012.23	-0.990434	0.266611	10.0624	-756.096
36	613.862	107.568	5232.81	514.939	-232.459	5120	-418.632	48.3006	5432.39	-1.09337	0.122371	11.1533	360.827	-84.1753	4147.46	-413.937	-29.6087	4221.59	390.185	74.0269	4135.89	-0.913741	-0.0152639	9.80839	351.258	57.8406	4217.28	-404.183	-40.4082	4081.6	324.063	-135.669	4190.73	-0.70067	0.0242885	8.10659	408.97	-65.662	4175.95	412.334	-120.034	4134.13	-335.601	142.861	4071.71	-0.951957	0.270352	10.1883	-739.768
37	600.754	110.897	5308.1	492.311	-237.823	5210.9	-387.734	49.3298	5509.87	-1.04629	0.124536	11.3255	339.384	-78.7044	4212.15	-396.94	-29.349	4274.1	375.153	73.8699	4206.31	-0.871799	-0.0192283	9.95554	338.418	58.4437	4289.44	-394.96	-42.5449	4136.6	309.859	-143.388	4252.24	-0.677131	0.0275201	8.22906	392.075	-66.2258	4218.13	395.126	-120.212	4174.2	-317.827	144.987	4123.93	-0.909271	0.272712	10.299	-719.312
38	586.297	115.043	5368.83	472.891	-240.869	5300.73	-366.759	52.1102	5581.24	-1.00753	0.125724	11.4823	316.826	-74.1823	4267.09	-378.645	-29.2385	4320.09	358.892	73.2919	4269.11	-0.827002	-0.0222351	10.084	324.506	60.3276	4351.68	-383.864	-44.1087	4187.61	293.569	-150.724	4310.22	-0.650326	0.0300436	8.3402	375.498	-67.2525	4257.35	376.37	-119.974	4209.04	-299.075	146.776	4171.02	-0.864767	0.274833	10.3987	-696.661
39	569.101	119.234	5416.02	453.921	-243.416	5382.9	-353.19	55.4863	5644.9	-0.972388	0.126947	11.6187	293.839	-70.8409	4312.52	-359.724	-30.1712	4360.23	340.979	73.2485	4322.64	-0.78008	-0.0255536	10.1931	309.016	62.4959	4404.12	-370.741	-44.4464	4236.16	275.201	-157.23	4363.83	-0.619832	0.0326401	8.44054	358.082	-69.7198	4293.78	358.202	-119.926	4241.46	-281.153	147.995	4215.06	-0.82074	0.277827	10.4916	-673.363
40	547.338	121.84	5454.72	432.797	-247.028	5451.42	-344.026	58.1479	5699.28	-0.935611	0.129539	11.7329	270.907	-68.0588	4349.41	-339.637	-31.9997	4394.77	320.841	73.4752	4367.3	-0.730542	-0.0293477	10.2841	290.769	63.4828	4447.81	-355.111	-44.1181	4279.34	254.798	-162.384	4412.08	-0.584601	0.0355579	8.52824	339.215	-73.4535	4326.69	341.148	-120.356	4271.8	-264.231	148.751	4255.9	-0.777257	0.281875	10.5772	-648.479
41	519.346	121.341	5489.75	408.581	-251.046	5506.17	-336.288	58.9515	5743.03	-0.893255	0.133298	11.8272	247.963	-65.5225	4378.77	-317.383	-34.1797	4423.83	297.852	73.2422	4404.3	-0.677058	-0.0328642	10.359	269.213	62.4219	4483.92	-336.469	-43.8472	4313.73	232.506	-165.47	4453.56	-0.544041	0.0384257	8.60092	318.828	-77.1282	4354.48	324.122	-121.226	4297.98	-246.839	149.491	4291.2	-0.732161	0.286224	10.6507	-620.117
42	485.97	118.102	5521.69	381.157	-253.71	5549.87	-327.218	58.391	5776.9	-0.843887	0.137073	11.9046	223.359	-63.8051	4401.73	-292.232	-36.2339	4447.29	271.762	72.0261	4434.59	-0.617569	-0.0348686	10.4191	245.6	60.1741	4513.9	-314.841	-43.865	4340.05	208.496	-165.789	4486.86	-0.499092	0.0400796	8.65908	296.884	-79.3871	4375.5	305.984	-122.485	4317.85	-227.456	150.67	4318.55	-0.683231	0.290089	10.7068	-587.01
43	449.961	113.918	5547.91	350.514	-253.583	5585.05	-314.18	57.8896	5802.87	-0.78758	0.139585	11.9663	195.191	-63.6282	4419.45	-264.54	-37.9559	4464.21	243.848	70.1326	4458.12	-0.551861	-0.034873	10.4648	221.488	57.8988	4539.28	-290.744	-43.9435	4362.85	183.247	-163.854	4511.54	-0.451412	0.0402499	8.70637	273.544	-79.7194	4388.92	286.314	-124.064	4330.54	-205.589	152.302	4337.08	-0.629847	0.293004	10.7436	-550.379
44	414.027	110.582	5565.83	317.309	-251.493	5612.63	-294.545	58.8799	5822.88	-0.724855	0.141166	12.0126	163.441	-65.0947	4432.6	-234.935	-39.2072	4473.47	215.766	68.0745	4474.56	-0.481709	-0.0330898	10.4952	197.476	56.1454	4560.36	-264.843	-43.8945	4385.61	157.579	-161.536	4528.29	-0.402355	0.0399149	8.7457	249.248	-78.7889	4395.05	265.687	-125.866	4336.95	-182.166	153.794	4348.09	-0.573609	0.294949	10.7629	-512.073
45	379.481	109.263	5575.09	282.481	-249.22	5632.86	-266.973	62.1418	5838.14	-0.656356	0.142797	12.0442	131.002	-67.3494	4441.1	-204.137	-39.8445	4474.67	188.522	66.2217	4483.7	-0.410739	-0.0303679	10.51	172.675	54.5183	4575.62	-238.495	-43.845	4405.07	132.232	-160.554	4537.91	-0.352704	0.0403659	8.77448	224.453	-77.3444	4394.23	244.751	-127.792	4338.14	-158.216	154.512	4353	-0.516271	0.295936	10.7673	-473.674
46	346.484	110.625	5577.18	246.972	-248.255	5646.06	-233.516	66.7432	5847.81	-0.584312	0.144404	12.0619	100.863	-69.4899	4444.82	-173.112	-39.7133	4469.46	161.416	64.5697	4485.54	-0.341503	-0.0272904	10.5103	146.129	52.5752	4583.46	-213.285	-44.0271	4415.72	107.091	-160.778	4541.62	-0.302793	0.0416541	8.78889	199.311	-75.9428	4386.73	223.757	-129.663	4334.72	-134.349	154.167	4352.75	-0.45867	0.296039	10.7581	-436.08
47	315.127	115.205	5573.61	211.735	-248.432	5652.94	-196.773	71.4745	5850.72	-0.511297	0.144635	12.0663	73.1365	-71.2405	4443.36	-142.855	-38.6608	4459.77	133.485	63.0526	4480.15	-0.274115	-0.0239018	10.4973	117.983	50.4974	4584.48	-189.602	-44.372	4415.32	81.6129	-161.138	4540.89	-0.252615	0.0430128	8.78882	173.373	-74.7685	4372.53	202.193	-131.143	4326.47	-110.367	153.147	4347.21	-0.399849	0.295451	10.7351	-400.065
48	284.828	121.509	5565.52	177.723	-248.994	5654.36	-159.262	75.1696	5845.79	-0.439354	0.14319	12.0581	45.4546	-72.8684	4436.07	-113.728	-36.846	4446.32	104.423	61.5411	4468.45	-0.206761	-0.0200159	10.4719	89.3305	49.0057	4581.15	-165.594	-44.2476	4407.88	55.3302	-160.941	4536.74	-0.201376	0.0439341	8.77914	146.125	-73.963	4351.6	179.456	-131.878	4313.1	-85.9767	151.914	4336.18	-0.33865	0.294378	10.6978	-365.297
49	254.409	126.234	5553.71	145.578	-249.145	5650.88	-122.116	77.3929	5833.27	-0.368902	0.141529	12.0384	15.6512	-74.5133	4422.37	-84.9671	-34.9774	4427.68	75.0941	59.7944	4452.93	-0.137822	-0.01589	10.4343	61.1506	48.6937	4575.57	-139.336	-43.0281	4397.73	28.0528	-160.791	4528.87	-0.148337	0.0448304	8.76382	117.462	-73.5897	4324.22	155.256	-131.676	4294.4	-61.0181	150.726	4319.55	-0.274615	0.292927	10.6462	-329.494
50	222.704	126.168	5538.88	114.441	-247.882	5641.54	-85.3214	78.315	5814.54	-0.298502	0.141334	12.0081	-16.1711	-75.1599	4402.03	-55.7238	-33.8044	4402.25	46.4637	57.578	4436.15	-0.0674679	-0.0127243	10.3853	33.2514	49.0035	4566.43	-111.162	-40.993	4384.65	-0.341804	-161.552	4516.67	-0.093512	0.0464444	8.74147	88.4179	-73.496	4291.49	130.156	-130.795	4270.51	-35.698	149.269	4297.48	-0.209227	0.290927	10.5814	-290.249
51	189.366	121.373	5520.11	83.0078	-244.141	5625	-48.8281	78.125	5791.02	-0.226951	0.141944	11.9665	-48.8281	-73.2422	4375	-26.0695	-33.5761	4370.08	18.8763	55.2316	4418.19	0.00304511	-0.012209	10.3248	4.88281	48.8281	4550.78	-83.0078	-39.0625	4365.23	-29.5155	-163.389	4500.16	-0.0378894	0.0490036	8.708	60.2185	-73.4925	4254.65	104.865	-129.571	4241.61	-10.2861	147.132	4270.21	-0.144303	0.288158	10.5049	-247.461
52	154.828	115.059	5494.88	50.1333	-237.486	5600.11	-12.7304	77.056	5763.76	-0.153814	0.140949	11.9119	-81.2576	-67.9955	4341.84	2.81447	-33.9394	4333.16	-8.06926	53.7876	4396.19	0.072272	-0.0154766	10.2525	-24.4964	47.4037	4526.36	-56.3554	-38.0439	4337.05	-58.4499	-165.429	4480.27	0.0172593	0.0519132	8.66094	33.7447	-73.4394	4214.74	79.9283	-128.299	4207.88	15.0002	144.077	4238.05	-0.0811928	0.284554	10.4178	-203.812
53	119.553	110.469	5460.72	15.3166	-229.997	5566.65	22.3019	75.5174	5732.51	-0.0795365	0.137813	11.842	-112.909	-61.8739	4305.51	29.7695	-34.5026	4293.57	-34.8187	54.2383	4367.25	0.139222	-0.0210735	10.1703	-54.5774	45.353	4493.54	-30.7334	-38.2374	4301.87	-86.1745	-166.757	4457.78	0.0714094	0.0539809	8.60221	8.49039	-73.3969	4171.97	55.2294	-127.132	4169.61	40.1538	140.561	4201.64	-0.0193913	0.280665	10.3212	-162.056
54	83.9711	108.547	5417.87	-21.7828	-224.379	5524.64	55.4547	73.963	5696.63	-0.00475776	0.134103	11.7567	-143.361	-58.1266	4269.56	55.1241	-34.8353	4252.64	-61.8242	56.2168	4331.13	0.204177	-0.0258255	10.0816	-84.8395	43.6432	4453.39	-5.19273	-39.8014	4262.52	-113	-166.989	4431.03	0.125041	0.0542257	8.53324	-16.3969	-73.4751	4126.35	30.4875	-126.185	4127.08	65.2197	137.214	4161.67	0.0420715	0.277196	10.2158	-123.401
55	48.4782	107.847	5369.43	-60.9107	-222.468	5474.8	85.9502	72.8394	5655.54	0.0695141	0.132454	11.6582	-172.362	-58.4716	4234.68	80.4405	-34.4749	4211.1	-89.5421	58.2274	4289.82	0.268522	-0.0268492	9.98931	-114.907	42.9443	4407.07	20.7359	-42.1853	4220.1	-140.105	-166.096	4396.67	0.178979	0.0525528	8.45335	-41.6088	-73.7656	4077.9	5.52505	-125.551	4080.6	90.1995	134.593	4118.79	0.103912	0.274757	10.1024	-87.7674
56	13.4792	106.828	5318.55	-99.8178	-223.173	5420.25	114.195	72.3646	5608.77	0.141691	0.133336	11.5507	-200.013	-61.416	4195.63	107.137	-33.0458	4169.46	-118.34	58.9112	4245.22	0.333737	-0.0239551	9.89103	-144.707	43.302	4356.03	46.8433	-43.8366	4173.36	-168.411	-164.209	4352.32	0.233639	0.0500236	8.36109	-66.897	-74.2538	4026.72	-19.2321	-125.208	4030.59	114.839	132.81	4073.09	0.165366	0.273409	9.98148	-54.901
57	-20.2945	104.539	5267.08	-135.838	-224.792	5364.61	142.024	72.4809	5556.08	0.210668	0.13618	11.4378	-226.453	-65.0936	4146.59	134.853	-31.0385	4126.36	-147.705	58.5832	4197.97	0.399248	-0.0192389	9.7817	-174.193	44.6719	4301.69	72.8926	-43.337	4121.13	-197.559	-162.158	4300.21	0.288604	0.0481278	8.2581	-91.6726	-74.8863	3972.93	-43.139	-125.087	3977.5	138.79	131.821	4024.5	0.225133	0.273017	9.85355	-23.1983
58	-51.7433	100.685	5215.35	-167.449	-225.901	5309.95	171.356	73.1139	5497.21	0.275949	0.140133	11.321	-251.69	-68.5823	4087.41	162.216	-29.4353	4079.43	-176.628	58.5092	4147.99	0.463191	-0.015187	9.65926	-203.024	46.6519	4244.19	98.853	-41.1748	4064.94	-226.811	-160.979	4243.92	0.343154	0.0474804	8.14777	-115.392	-75.6297	3916.62	-65.6338	-125.142	3921.73	161.734	131.563	3972.94	0.282039	0.273461	9.7189	9.71003
59	-79.7972	95.0321	5163.56	-196.353	-225.86	5254.08	203.729	74.1808	5432.12	0.339068	0.144853	11.1989	-275.571	-72.0508	4024.52	188.006	-29.0179	4026.64	-204.181	59.7198	4095.03	0.523764	-0.0130885	9.52699	-230.514	48.4269	4182.12	124.804	-38.8556	4007.68	-255.28	-161.018	4185.27	0.396319	0.0478593	8.03225	-137.901	-76.6237	3857.54	-86.877	-125.482	3863.33	183.59	131.819	3918.34	0.336025	0.274769	9.57731	45.6012
60	-105.059	88.1181	5109.98	-224.815	-224.171	5194.05	238.324	75.5453	5361.94	0.401471	0.149508	11.0691	-297.971	-75.6983	3964.15	212.005	-29.2965	3968.45	-229.994	61.7299	4037.8	0.580403	-0.0120227	9.38911	-256	49.2322	4114.16	150.432	-37.2812	3950.06	-281.785	-161.268	4122.56	0.446699	0.0485209	7.91003	-159.249	-78.0972	3795.27	-107.401	-126.296	3802.2	204.402	132.296	3860.65	0.387604	0.277044	9.42829	82.5424
61	-130.17	81.4243	5050.49	-254.321	-220.843	5127.42	273.424	77.0505	5288.26	0.464862	0.152951	10.9279	-319.135	-79.3693	3905.88	234.375	-29.2969	3906.25	-253.906	63.4766	3974.61	0.633306	-0.0105137	9.24505	-279.291	49.1586	4040.82	174.278	-35.5585	3886.18	-305.169	-160.61	4053.77	0.492471	0.0492593	7.77633	-179.489	-80.258	3729.37	-127.684	-127.747	3738.2	224.209	132.721	3799.8	0.437247	0.280366	9.27134	117.188
62	-157.841	76.4561	4980.93	-284.495	-217.106	5053.01	307.315	78.5405	5212.67	0.52968	0.154873	10.7728	-339.553	-82.6792	3845.02	255.374	-28.2731	3841.09	-275.852	64.151	3904.77	0.683005	-0.00764353	9.09144	-300.501	48.8488	3963.79	194.731	-32.5205	3809.27	-325.473	-158.846	3978.92	0.532693	0.0502875	7.62782	-198.729	-83.0185	3659.61	-147.431	-129.595	3671.18	243.002	133.104	3735.55	0.484791	0.284474	9.10593	147.117
63	-188.591	73.3958	4900.57	-314.689	-214.358	4969.83	338.803	79.9323	5135.88	0.59499	0.156077	10.603	-359.607	-85.2801	3777.53	275.636	-26.3969	3772.67	-296.136	63.9655	3831.61	0.730536	-0.00398633	8.92745	-319.762	48.8314	3884.26	211.778	-28.3763	3720.1	-343.813	-156.612	3899.82	0.568163	0.0515384	7.46698	-217.117	-86.0782	3585.85	-165.79	-131.312	3600.99	260.735	133.664	3667.53	0.52962	0.288865	8.9315	173.626
64	-220.048	70.6793	4813.21	-344.2	-213.415	4878.6	367.606	81.2709	5057.06	0.658419	0.158276	10.4211	-379.066	-87.0501	3703.33	295.888	-24.0692	3700.34	-315.154	63.3877	3759.44	0.776602	-0.000319088	8.75591	-337.277	48.9441	3800.61	227.111	-24.8091	3627.58	-361.186	-154.505	3817.93	0.600759	0.0524135	7.29949	-234.786	-89.1314	3507.97	-181.934	-132.378	3527.47	277.359	134.607	3595.4	0.571122	0.293029	8.74757	198.939
65	-249.663	66.6446	4722.94	-372.209	-213.909	4783.6	393.536	82.6147	4975.24	0.717456	0.162425	10.2324	-397.49	-87.9457	3623.74	316.228	-21.7471	3623.28	-333.164	62.8807	3690.15	0.821133	0.00260246	8.57869	-353.272	48.7847	3710.25	242.268	-23.3022	3539.33	-377.574	-152.696	3731.93	0.631616	0.0523205	7.12774	-251.519	-91.8597	3426.27	-195.933	-132.636	3450.77	292.788	135.77	3519.46	0.609106	0.296444	8.55474	224.6
66	-275.948	60.6715	4632.4	-397.891	-215.322	4689.45	416.488	84.0139	4889.4	0.770391	0.168633	10.0412	-414.516	-88.0616	3539.67	335.103	-20.0342	3540.25	-350.05	62.8963	3619.21	0.862537	0.00402467	8.39198	-368	48.261	3611.91	257.251	-23.5783	3452.07	-392.551	-151.179	3639.36	0.660622	0.0514967	6.94719	-266.752	-93.9325	3341.47	-208.754	-132.292	3371.34	306.896	136.626	3440.6	0.643798	0.298571	8.35472	250.372
67	-298.935	53.6299	4542.18	-420.886	-216.742	4597.85	437.177	85.4382	4798.21	0.817499	0.175618	9.84832	-430.013	-87.8888	3450.82	350.705	-19.5491	3449.96	-365.642	63.8787	3541.1	0.89916	0.0034991	8.1902	-381.788	48.1722	3508.13	271.448	-24.6601	3358.24	-405.928	-149.795	3538.86	0.687468	0.0499537	6.75369	-279.911	-95.0246	3254.3	-221.385	-131.564	3289.64	319.555	136.635	3359.78	0.675436	0.298878	8.14925	275.727
68	-318.776	46.4974	4452.67	-441.632	-216.577	4505.43	456.786	86.8117	4700.11	0.860031	0.181511	9.65046	-443.893	-87.9804	3356.68	362.361	-20.1373	3352.71	-379.927	65.7773	3453.14	0.930393	0.00162035	7.97108	-394.963	49.4585	3402.06	284.153	-25.5466	3253.92	-418.159	-147.966	3431.93	0.712205	0.0473565	6.54774	-290.741	-95.0978	3164.65	-234.039	-130.526	3205.3	330.651	135.503	3277.1	0.70389	0.297153	7.93806	300.279
69	-335.911	39.8316	4361.95	-460.644	-213.195	4408.31	476.499	88.0578	4593.58	0.8995	0.184712	9.44247	-455.882	-88.3716	3257.21	371.398	-20.2832	3251.58	-393.173	67.6698	3357.64	0.957276	0.000328341	7.73884	-407.14	51.9397	3293.92	294.457	-25.1903	3143.1	-429.773	-145.05	3320.5	0.734335	0.0440848	6.33329	-299.431	-94.5119	3071.3	-245.858	-129.055	3116.91	340.084	133.273	3191.54	0.728528	0.293625	7.71811	323.89
70	-351.231	33.5398	4264.48	-478.201	-206.582	4302.96	496.72	89.0212	4477.96	0.937018	0.185166	9.21747	-465.436	-88.2943	3153.06	379.322	-18.3832	3149.86	-405.661	68.5725	3257.4	0.980779	0.00104996	7.49874	-416.829	53.7001	3179.29	301.492	-22.6355	3030.54	-440.263	-140.521	3204.53	0.751999	0.0416609	6.11055	-306.2	-93.6542	2972.93	-255.905	-127.012	3022.96	347.759	130.015	3102.01	0.74868	0.288557	7.48619	346.424
71	-365.656	27.4724	4154.48	-494.241	-199.096	4186.37	515.793	89.3395	4354.84	0.972019	0.184389	8.97038	-471.987	-86.9759	3044.88	386.74	-14.5138	3047.33	-417.101	68.4091	3153.64	1.00071	0.003179	7.25208	-422.505	52.7858	3053.63	305.483	-18.5239	2916.87	-447.886	-133.993	3081.61	0.763221	0.0406856	5.87544	-311.116	-92.7089	2868.79	-263.69	-124.33	2922.82	353.563	125.905	3007.6	0.763907	0.282191	7.24042	367.138
72	-379.535	21.395	4030.32	-508.656	-193.238	4055.66	531.731	88.617	4226.23	1.00327	0.184033	8.69943	-475.079	-84.8016	2931.71	393.18	-10.7764	2939.57	-426.52	68.197	3045.74	1.01557	0.00457146	6.99415	-423.732	49.2438	2917.51	307.541	-14.7965	2799.32	-450.996	-125.25	2949.73	0.767371	0.0397295	5.62518	-313.953	-91.466	2759.17	-269.591	-121.078	2817.62	357.361	121.331	2907.81	0.774222	0.274728	6.98154	384.551
73	-392.26	14.9315	3897.45	-520.83	-189.745	3912	542.659	86.5018	4094.05	1.02859	0.184637	8.41064	-474.35	-83.1581	2811.21	398.103	-9.25494	2822.22	-432.937	68.9598	2932.99	1.0239	0.0038774	6.71917	-421.009	44.8521	2775.86	308.359	-12.8627	2675.41	-449.498	-115.612	2811.5	0.765163	0.0375794	5.36309	-314.45	-89.6701	2644.5	-274.085	-117.339	2708.68	359.012	116.704	2802.17	0.779688	0.266366	6.71062	397.261
74	-403.13	7.69554	3761.93	-529.5	-187.13	3761.67	548.583	83.3797	3959.19	1.04658	0.185696	8.11338	-469.518	-83.1885	2681.46	400.913	-9.71932	2696.1	-435.892	70.7347	2815.14	1.02463	0.00214487	6.42603	-414.894	41.2095	2633.22	306.538	-11.4646	2544.62	-444.147	-107.231	2672.04	0.756539	0.0354108	5.0951	-312.464	-87.1111	2524.94	-277.365	-113.153	2596.65	358.398	112.225	2690.28	0.780248	0.257132	6.42798	405.941
75	-411.249	-0.354195	3626.55	-533.398	-183.806	3611.11	551.077	80.2487	3821.71	1.05683	0.186823	7.81421	-460.928	-83.8389	2544.07	400.97	-10.0192	2566.32	-435.363	72.7398	2692.26	1.01752	0.000847003	6.1201	-406.12	38.0414	2489.81	300.096	-8.5897	2406.97	-435.612	-101.723	2535	0.741123	0.0357586	4.82373	-308.178	-83.7041	2399.85	-278.844	-108.437	2480.33	355.454	107.525	2571.92	0.775515	0.24658	6.13195	412.985
76	-415.368	-8.62973	3488.13	-532.176	-179.162	3462.49	551.758	78.125	3681.64	1.05936	0.187888	7.51242	-449.219	-83.0078	2402.34	397.631	-8.17672	2437.41	-431.328	74.1954	2564.34	1.00255	0.00049857	5.80748	-395.508	34.1797	2343.75	289.099	-4.01879	2263.5	-424.223	-98.7085	2398.39	0.719705	0.0392751	4.54713	-301.829	-79.3857	2268.48	-277.802	-103.086	2358.21	350.123	102.134	2446.93	0.765046	0.234187	5.82053	420.57
77	-414.209	-16.4778	3342.85	-526.486	-173.65	3313.33	551.656	77.6728	3537.8	1.05445	0.189219	7.20275	-434.787	-79.196	2258.59	390.239	-4.47904	2307.08	-423.651	74.5828	2429.95	0.979413	0.000105269	5.48709	-383.334	28.8952	2193.42	276.931	-0.446017	2116.84	-410.22	-97.3285	2258.95	0.694816	0.0441283	4.26386	-293.362	-74.1044	2130.07	-273.678	-96.9894	2229.04	342.211	95.7074	2314.98	0.748175	0.219537	5.49177	428.233
78	-407.397	-23.487	3187.01	-517	-167.75	3160.78	549.445	78.1471	3384.15	1.04137	0.190338	6.87629	-417.034	-73.3394	2111.13	378.13	-0.499058	2169.13	-412.128	73.5313	2286.9	0.946953	-0.000541998	5.15102	-367.693	23.2361	2038.27	266.835	-0.494123	1969.55	-393.107	-95.8539	2113.14	0.667003	0.0468131	3.97291	-281.547	-67.8571	1983.8	-266.557	-90.0126	2092.55	330.958	88.4106	2175.12	0.723334	0.202651	5.14402	434.014
79	-396.354	-29.7256	3017.12	-503.873	-161.502	2998.51	543.213	78.4506	3213.45	1.01989	0.190546	6.52098	-395.123	-66.9798	1957.33	360.925	2.38151	2018.72	-396.664	70.8187	2133.86	0.904142	-0.00114312	4.79238	-346.144	18.6912	1878	257.155	-3.09395	1821.68	-371.22	-91.1695	1957.07	0.632528	0.0450351	3.67162	-264.861	-60.6527	1828.86	-256.682	-82.0157	1948.73	315.466	80.5337	2026.29	0.688732	0.183661	4.77571	436.055
80	-382.71	-35.3183	2829.72	-486.784	-154.535	2816.98	531.048	77.5024	3018.67	0.989579	0.188905	6.12268	-369.279	-61.2094	1795.87	339.996	4.05123	1859.7	-377.828	67.1256	1974.97	0.852682	-0.00146277	4.41637	-317.609	16.099	1714.98	243.225	-4.90389	1671.72	-342.958	-80.3629	1787.73	0.586622	0.0385287	3.35855	-242.202	-52.5595	1665.54	-244.181	-72.9872	1798.03	294.978	72.3778	1868.01	0.642942	0.162862	4.38708	433.257
81	-367.627	-40.399	2624.45	-465.307	-146.472	2607.47	511.141	74.7654	2799.52	0.949681	0.184864	5.67477	-341.958	-56.1769	1628.27	317.383	4.88281	1699.22	-356.445	63.4766	1816.41	0.796743	-0.00189571	4.03467	-283.873	14.9346	1557.03	222.007	-3.69078	1520.32	-308.994	-64.9977	1614.73	0.528908	0.0300987	3.04547	-214.919	-43.9937	1500.57	-228.493	-63.6679	1643.66	269.561	64.3041	1703.43	0.586668	0.141502	3.98889	424.805
82	-351.254	-45.1215	2407.6	-437.717	-137.084	2376.16	481.803	70.3578	2563.9	0.897889	0.178453	5.19162	-315.788	-51.9075	1456.52	294.792	5.20313	1542.44	-333.315	60.5228	1662.09	0.740354	-0.00267641	3.65595	-247.137	14.5109	1412.54	196.185	-1.12303	1375.66	-271.658	-49.8927	1456.87	0.464069	0.0222362	2.75534	-185.248	-35.497	1343.04	-208.807	-55.0709	1489.85	239.58	56.6961	1536.98	0.521385	0.121176	3.59575	411.102
83	-333.608	-49.6412	2186.33	-401.253	-126.256	2141.02	441.354	64.4368	2320.15	0.831076	0.169813	4.69691	-290.127	-48.281	1285.67	272.594	5.15193	1386.56	-309.135	57.418	1506.8	0.68385	-0.00312571	3.27786	-211.394	14.4167	1285.68	169.657	0.351843	1247.36	-233.742	-39.1145	1329.06	0.399042	0.0162589	2.50676	-155.63	-27.6509	1201.51	-184.65	-48.0752	1341.14	205.751	49.8758	1373.69	0.4493	0.103351	3.22255	397.419
84	-313.377	-53.8679	1968.74	-353.667	-113.921	1919.69	389.128	57.2598	2077.34	0.746258	0.159013	4.21523	-260.552	-45.0088	1124.35	250.822	4.82238	1226.76	-284.579	52.9424	1342.99	0.624315	-0.00244032	2.89751	-182.707	14.5604	1175.68	146.18	0.132279	1139.91	-200.21	-32.5149	1225.23	0.343419	0.0117395	2.29823	-130.253	-21.3773	1080.06	-158.472	-42.3885	1204.79	171.833	43.6326	1223.57	0.378968	0.0883725	2.8869	390.231
85	-286.138	-57.1342	1765.16	-299.471	-100.54	1721.28	330.726	49.7024	1848.79	0.647454	0.146526	3.7697	-223.101	-41.8651	980.999	228.653	4.41071	1063.66	-259.595	46.51	1170.32	0.557954	-0.000183741	2.5217	-166.637	14.8533	1081.34	129.324	-0.114289	1051.54	-176.702	-28.6058	1132.66	0.30679	0.00885209	2.11955	-114.207	-17.7738	980.455	-134.226	-37.1159	1089.54	143.15	37.4815	1099.21	0.322214	0.0760075	2.60777	389.134
86	-247.036	-58.69	1586.21	-247.769	-86.9328	1549.09	274.139	42.8756	1649.44	0.543312	0.133187	3.38075	-181.618	-39.4619	859.63	203.011	4.38372	912.073	-232.225	39.1971	1007.12	0.483836	0.00364614	2.1796	-161.548	15.0338	999.524	121.925	1.14683	979.621	-165.525	-26.214	1043.03	0.29143	0.00800104	1.96159	-112.043	-17.8164	903.958	-115.721	-31.4543	1003.12	124.72	31.0192	1011.86	0.290041	0.0660664	2.40185	375.685
87	-196.819	-57.8955	1436.86	-207.181	-74.0274	1405.41	227.328	37.8865	1494.08	0.446076	0.119982	3.06393	-144.983	-38.9519	761.392	170.514	5.24663	788.973	-200.243	32.3422	874.641	0.404526	0.00929959	1.90208	-161.161	14.7286	925.845	121.27	3.37023	918.213	-161.887	-24.8392	957.448	0.288392	0.00874993	1.81836	-120.888	-20.81	845.111	-104.58	-25.9178	940.298	117.199	24.9776	954.382	0.281963	0.0590026	2.25443	328.75
88	-150.573	-54.3921	1307.58	-180.526	-63.7802	1283.06	195.526	35.4308	1384.19	0.372096	0.108531	2.80849	-120.658	-40.8516	685.713	132.742	7.03389	701.032	-164.6	26.6955	780.867	0.327862	0.0166206	1.70019	-159.88	13.6309	856.03	122.084	5.05196	859.818	-160.196	-24.0474	878.116	0.286991	0.0100401	1.68366	-132.521	-24.8548	793.616	-100.855	-21.9692	886.409	118.098	20.9074	906.383	0.28921	0.0557327	2.12822	247.569
89	-125.636	-47.8671	1186.55	-167.256	-58.7441	1169.43	179.154	35.4806	1297.71	0.333533	0.100398	2.58158	-107.683	-42.0685	622.621	100.014	8.95062	636.736	-131.855	21.9696	710.429	0.266331	0.0227853	1.54502	-156.335	11.8151	786.611	120.827	5.33135	798.871	-157.329	-22.9698	804.928	0.282014	0.0107006	1.55154	-138.845	-28.0652	739.323	-104.461	-21.015	827.038	124.821	20.2907	847.827	0.302913	0.0570818	1.98651	167.275
90	-131.778	-39.2889	1067.39	-166.403	-60.9787	1053.88	178.142	37.9342	1210.24	0.336555	0.0976491	2.35394	-102.175	-38.2577	558.885	83.2452	10.1355	582.847	-108.978	17.7797	645.841	0.230914	0.0240121	1.4021	-150.63	9.48846	714.396	118.349	4.97754	734.664	-152.542	-20.3174	735.552	0.273595	0.0102595	1.41796	-137.419	-29.4872	677.881	-112.96	-22.6765	757.753	133.853	22.6195	773.52	0.316165	0.0615352	1.8178	125.811
91	-157.619	-33.203	958.827	-173.85	-68.3922	943.164	191.878	42.6141	1099.78	0.369781	0.101894	2.12096	-100.139	-27.5809	486.133	83.6153	10.3227	530.253	-97.7287	14.0093	578.11	0.220784	0.0187418	1.25066	-142.953	7.01908	637.721	116.118	4.96335	667.263	-145.323	-15.1374	667.643	0.262479	0.00849088	1.28037	-131.45	-29.0984	610.74	-121.559	-24.7901	684.113	140.764	25.3955	693.114	0.324016	0.0652388	1.6358	133.14
92	-188.117	-34.7729	872.235	-183.924	-76.8401	852.581	214.42	48.5994	968.411	0.414375	0.113201	1.90295	-97.2822	-15.4138	409.979	90.5678	9.96395	474.807	-93.5862	10.8653	508.48	0.220748	0.011383	1.09282	-133.73	5.2375	559.313	114.444	5.27707	597.156	-136.123	-8.99877	599.433	0.249434	0.00586649	1.1397	-124.347	-26.9206	539.577	-125.431	-25.1404	612.021	141.154	26.0654	616.746	0.321678	0.0642862	1.45508	165.51
93	-209.357	-45.6997	807.435	-190.641	-82.2529	791.533	236.798	54.5472	831.836	0.44994	0.128949	1.71753	-89.3031	-8.34335	338.454	93.273	9.54328	412.896	-91.7264	8.55082	438.753	0.215152	0.00732265	0.93347	-123.422	5.04426	482.628	112.55	4.98778	525.22	-125.811	-4.5659	529.406	0.234821	0.00292692	0.997781	-117.366	-23.1401	464.992	-122.832	-22.6813	543.391	133.846	23.4966	547.267	0.307782	0.0570382	1.28006	197.966
94	-210.866	-57.1199	729.043	-185.952	-81.1756	728.474	250.013	59.1098	705.909	0.45703	0.13948	1.52861	-74.814	-8.30018	274.528	88.0364	9.36867	344.811	-88.5121	6.88379	369.916	0.197159	0.00845937	0.775933	-112.09	6.58463	407.827	109.542	3.39222	452.196	-115.091	-3.12741	456.964	0.218556	-4.21861e-05	0.854813	-108.782	-18.1714	386.093	-116.293	-17.9887	474.594	122.137	18.5284	477.413	0.285703	0.0450004	1.10105	219.112
95	-182.827	-58.1622	594.989	-160.942	-70.411	614.688	247.463	61.0408	599.598	0.417746	0.133975	1.27838	-56.9398	-9.9976	213.325	77.0845	9.60199	274.089	-81.2911	5.36236	302.272	0.168885	0.0111671	0.619399	-99.1788	8.83334	329.965	104.092	1.23197	377.968	-104.18	-1.96741	384.183	0.199557	-0.00365682	0.708857	-96.6593	-12.4475	301.904	-108.642	-11.7607	401.62	109.638	12.1463	399.227	0.259147	0.0299143	0.907397	228.801
96	-122.727	-42.5004	386.426	-110.34	-48.2776	416.487	228.843	59.3588	503.798	0.326372	0.106082	0.923281	-39.1289	-7.83016	149.779	62.7756	10.3229	204.408	-67.8479	3.54031	236.21	0.133147	0.0114617	0.463085	-84.1113	10.682	244.248	94.736	-0.263671	302.142	-93.1767	2.25702	313.563	0.176562	-0.00856941	0.558167	-80.3052	-6.59646	214.977	-100.719	-4.97554	323.074	97.8591	5.46043	310.508	0.229479	0.0140151	0.698236	226.902
97	-52.4317	-18.9756	162.017	-49.6921	-21.7431	186.323	194.866	53.1254	406.481	0.209844	0.0663072	0.533333	-23.6578	-1.61581	87.4935	47.0073	10.8461	139.898	-49.9664	1.61313	173.169	0.0946187	0.00850934	0.314184	-66.9368	11.3383	156.491	80.5712	-0.511769	225.735	-80.9194	9.29811	245.371	0.148265	-0.0137266	0.407352	-61.4391	-1.62484	134.717	-89.4981	0.844269	242.652	84.2384	-0.176467	220.242	0.193514	0.000497087	0.491743	210.088
98	1.11716	0.411068	-3.42672	-1.91918	-0.83977	7.17543	146.577	41.5501	296.593	0.104133	0.0296609	0.212212	-11.7899	4.13645	37.5702	31.4148	10.0521	84.9404	-31.6999	0.140409	115.175	0.0587522	0.0045299	0.186432	-48.2442	10.2836	81.6852	61.7584	-0.140987	152.406	-64.6361	14.3098	177.014	0.113352	-0.0160543	0.266835	-42.0578	1.41796	71.3053	-71.5117	4.11468	164.635	65.7482	-3.38488	138.695	0.147551	-0.00733777	0.308269	173.22
99	19.1558	7.04857	-58.7578	15.4598	6.7647	-57.8003	90.5428	26.3252	179.495	0.0395163	0.00884055	0.044469	-4.53305	5.37792	9.7022	17.5763	7.12652	43.3479	-16.7128	-0.424361	64.4887	0.0304506	0.00170438	0.0921928	-28.8791	7.18922	33.1949	38.8485	0.127352	86.2406	-42.1019	12.7482	106.713	0.0712867	-0.0128581	0.146786	-24.1214	2.01777	31.0249	-45.9741	4.05126	93.8702	41.6474	-3.49872	73.8575	0.0919475	-0.00787281	0.163543	114.089
100	12.8036	4.7112	-39.2732	10.7609	4.70859	-40.2321	37.9196	11.2036	74.1666	0.0101429	0.00126037	-0.00377216	-1.13412	2.9442	0.425059	6.73353	3.16699	15.3931	-6.10519	-0.308789	24.7203	0.0109597	0.000416954	0.0317968	-11.5826	3.16346	9.057	16.0154	0.108985	33.0765	-17.7692	6.23435	42.903	0.0294464	-0.00602907	0.0551944	-9.48835	1.13918	9.37285	-19.5069	2.0787	36.7661	17.5121	-1.82293	27.4211	0.0382685	-0.00414783	0.0605287	48.7006
101	0	0	0	0	0	0	0	0	0	0	0	0	0	0	0	0	0	0	0	0	0	0	0	0	0	0	0	0	0	0	0	0	0	0	0	0	0	0	0	0	0	0	0	0	0	0	0	0	0
[truncated: 74 more columns]

## Sheet: RHGRF
	RHGRF_Z	RHGRF_Z	RHGRF_Z	RHGRF_Z	RHGRF_Z	RHGRF_Z	RHGRF_Z	RHGRF_Z	RHGRF_Z				RHGRF_Z	RHGRF_Z	RHGRF_Z	RHGRF_Z	RHGRF_Z	RHGRF_Z	RHGRF_Z	RHGRF_Z	RHGRF_Z				RHGRF_Z	RHGRF_Z	RHGRF_Z	RHGRF_Z	RHGRF_Z	RHGRF_Z	RHGRF_Z	RHGRF_Z	RHGRF_Z				RHGRF_Z	RHGRF_Z	RHGRF_Z	RHGRF_Z	RHGRF_Z	RHGRF_Z	RHGRF_Z	RHGRF_Z	RHGRF_Z				RHGRF_Z
	LINK_MODEL_BASED	LINK_MODEL_BASED	LINK_MODEL_BASED	LINK_MODEL_BASED	LINK_MODEL_BASED	LINK_MODEL_BASED	LINK_MODEL_BASED	LINK_MODEL_BASED	LINK_MODEL_BASED				LINK_MODEL_BASED	LINK_MODEL_BASED	LINK_MODEL_BASED	LINK_MODEL_BASED	LINK_MODEL_BASED	LINK_MODEL_BASED	LINK_MODEL_BASED	LINK_MODEL_BASED	LINK_MODEL_BASED				LINK_MODEL_BASED	LINK_MODEL_BASED	LINK_MODEL_BASED	LINK_MODEL_BASED	LINK_MODEL_BASED	LINK_MODEL_BASED	LINK_MODEL_BASED	LINK_MODEL_BASED	LINK_MODEL_BASED				LINK_MODEL_BASED	LINK_MODEL_BASED	LINK_MODEL_BASED	LINK_MODEL_BASED	LINK_MODEL_BASED	LINK_MODEL_BASED	LINK_MODEL_BASED	LINK_MODEL_BASED	LINK_MODEL_BASED				LINK_MODEL_BASED
	PROCESSED	PROCESSED	PROCESSED	PROCESSED	PROCESSED	PROCESSED	PROCESSED	PROCESSED	PROCESSED				PROCESSED	PROCESSED	PROCESSED	PROCESSED	PROCESSED	PROCESSED	PROCESSED	PROCESSED	PROCESSED				PROCESSED	PROCESSED	PROCESSED	PROCESSED	PROCESSED	PROCESSED	PROCESSED	PROCESSED	PROCESSED				PROCESSED	PROCESSED	PROCESSED	PROCESSED	PROCESSED	PROCESSED	PROCESSED	PROCESSED	PROCESSED				PROCESSED
ITEM	X	Y	Z	X	Y	Z	X	Y	Z	Horse 2			X	Y	Z	X	Y	Z	X	Y	Z	Horse 10			X	Y	Z	X	Y	Z	X	Y	Z	Horse 7			X	Y	Z	X	Y	Z	X	Y	Z	Horse 5			X
1	195.312	-185.547	625	73.2422	-302.734	576.172	0	0	0	-0.189752	0.345004	0.84871	297.852	-39.0625	263.672	68.3594	48.8281	48.8281	517.578	53.7109	615.234	-0.585973	0.0268092	0.727678	239.258	-268.555	634.766	-771.484	-4.88281	1464.84	-29.2969	-107.422	117.188	-0.637024	0.240865	1.43885	168.208	-245.908	489.7	-15.3566	-161.286	316.568	11.3967	164.415	299.417	-0.116396	0.470348	0.909812	-78.125
2	346.326	-68.5689	735.786	284.211	-230.802	716.539	-215.07	74.4531	208.917	-0.597479	0.264132	1.17378	316.011	-1.92156	417.495	38.7192	56.2213	113.373	577.546	36.9303	738.362	-0.670501	0.0166383	0.995534	202.541	-262.023	696.905	-544.818	-11.3776	1411.39	77.0166	-50.5799	288.251	-0.535075	0.195516	1.55552	214.53	-167.09	610.053	96.6244	-106.762	499.272	-94.6947	107.048	457.995	-0.333952	0.313424	1.28967	-203.423
3	473.969	91.9675	780.324	506.931	-95.7757	795.926	-471.113	159.254	486.849	-1.02595	0.115214	1.45772	292.77	44.0656	596.016	3.64458	52.7449	204.083	562.459	6.27747	804.253	-0.667949	0.00188393	1.25839	125.924	-211.679	700.826	-151.543	-14.8928	1130.85	204.495	31.3565	500.872	-0.312826	0.107375	1.51398	244.74	-37.7701	706.033	231.477	-19.3642	692.123	-221.348	14.2675	627.56	-0.57399	0.0587529	1.66686	-367.325
4	493.082	195.181	790.295	608.026	16.303	820.731	-652.385	210.014	754.241	-1.23896	-0.00103841	1.67122	252.009	75.2332	770.524	1.67254	35.4278	314.704	500.829	-23.9829	841.996	-0.589184	-0.0124106	1.51164	58.3433	-147.446	709.896	177.854	-8.438	863.808	283.912	88.4481	703.233	-0.106708	0.0328168	1.47789	248.841	82.3337	784.096	328.793	55.8631	854.97	-310.909	-68.8335	782.125	-0.731136	-0.170355	1.99227	-537.102
5	336.577	155.695	796.362	487.066	34.9867	802.368	-649.568	185.098	935.182	-1.04092	-0.00394549	1.79038	216.794	69.2269	913.531	63.1581	2.73373	439.248	420.135	-41.2129	878.923	-0.450044	-0.0198289	1.75046	46.2422	-98.1527	784.447	243.212	13.4581	821.864	256.728	78.0055	850.082	-0.038787	0.0218121	1.59436	217.001	133.966	850.71	329.869	74.9662	948.828	-307.353	-98.2045	896.393	-0.702896	-0.252727	2.21834	-679.444
6	82.5936	12.7155	821	235.995	-19.1042	781.519	-470.598	93.0231	1020.27	-0.557615	0.0702413	1.85318	195.396	27.6154	1019.82	152.711	-35.3438	573.84	339.563	-45.8462	928.266	-0.29982	-0.0134228	1.9781	90.5954	-72.6616	929.32	88.0231	44.0583	983.821	150.235	15.5934	948.897	-0.099182	0.0656379	1.85766	152.429	94.8866	913.445	232.34	30.0434	973.311	-208.467	-64.2586	967.912	-0.488143	-0.155674	2.34896	-758.495
7	-120.78	-134.549	882.736	16.3903	-92.387	809.459	-225.854	-13.8687	1058.22	-0.085823	0.150546	1.94336	183.154	-27.1312	1103.62	203.274	-63.2582	715.624	274.3	-44.6123	996.464	-0.199369	0.00665558	2.20853	152.651	-62.3901	1100.88	-126.866	70.7453	1216.35	33.0709	-55.1661	1032.56	-0.202891	0.12222	2.17424	80.66	6.22444	981.762	101.741	-43.3588	974.545	-76.8887	1.05733	1021.76	-0.213356	0.0314259	2.4505	-737.698
8	-132.886	-191.012	998.629	-29.0516	-136.005	929.663	-29.1334	-81.7786	1099.68	0.0938354	0.173277	2.13947	174.976	-71.8454	1179.84	151.479	-66.3354	861.691	238.705	-44.0306	1089.43	-0.205661	0.0388578	2.45581	192.333	-58.1707	1253.89	-246.376	81.5236	1390.74	-28.6778	-92.2871	1132.9	-0.266137	0.150572	2.45187	29.4198	-84.672	1065.3	7.64804	-107.107	1001.43	20.8821	63.324	1084.65	-0.0133184	0.209911	2.59311	-597.473
9	41.1298	-145.056	1158.96	77.2132	-142.629	1117.57	41.8944	-76.5963	1179.47	-0.0540162	0.149149	2.4419	167.88	-90.5424	1260.48	5.96271	-46.7145	1008.01	232.246	-45.9851	1204.22	-0.309166	0.0704458	2.72387	184.88	-53.114	1359.67	-236.063	76.6036	1476.98	-21.0621	-87.4047	1259.61	-0.25955	0.140927	2.65875	24.6475	-132.826	1172.96	7.24674	-129.056	1094.31	30.1066	93.2447	1178.86	-0.00147098	0.292215	2.83564	-399.703
10	267.619	-58.6253	1330.4	227.692	-126.315	1313.58	15.8233	-22.1274	1285.91	-0.338791	0.115038	2.77674	165.088	-88.3648	1349.1	-161.176	-21.3526	1149.59	241.268	-48.2744	1330.07	-0.44515	0.0904263	3.00313	150.586	-47.0323	1438.4	-167.812	66.9532	1532.04	23.9181	-61.785	1402.83	-0.222186	0.114087	2.83855	64.7422	-129.8	1302.01	81.2566	-114.016	1240.78	-31.3805	93.1372	1299.16	-0.145956	0.277261	3.16135	-230.684
11	409.726	4.34675	1479.13	320.014	-101.009	1461.66	-59.3113	47.2271	1398.79	-0.557519	0.101668	3.06622	170.958	-74.321	1447.7	-276.302	-7.55178	1281.43	251.766	-48.5749	1456.03	-0.548289	0.0904714	3.28267	117.983	-40.9638	1519.15	-116.585	63.7895	1615.4	72.9113	-37.55	1552.1	-0.199575	0.0923644	3.04195	126.485	-95.8388	1440.6	181.256	-80.8785	1408.34	-118.087	77.367	1429.89	-0.350392	0.209073	3.52083	-160.219
12	408.157	14.2188	1591.08	330.882	-76.8118	1558	-137.578	98.8547	1499.32	-0.61939	0.114074	3.28442	189.335	-57.0637	1557.98	-307.126	-12.0913	1402.4	256.211	-45.7223	1576.16	-0.590367	0.0711374	3.55829	113.512	-35.8989	1628.86	-121.049	70.5806	1754.84	106.954	-26.5341	1700.25	-0.221666	0.0863348	3.29983	186.077	-51.9586	1576.62	259.031	-48.472	1564.6	-184.715	60.2537	1555.43	-0.518249	0.132219	3.86464	-171.33
13	327.34	-3.94504	1683.69	293.989	-61.0455	1636.39	-198.559	121.83	1585.98	-0.579308	0.132002	3.46648	217.822	-40.9405	1678.05	-287.309	-24.9636	1517.52	257.405	-40.401	1692.58	-0.598103	0.0442206	3.83408	138.204	-32.2462	1768.41	-161.971	78.4343	1927.68	130.035	-24.1596	1845.37	-0.279235	0.0875202	3.59678	223.44	-16.2471	1699.8	289.375	-27.4921	1692.07	-207.708	50.0367	1667.7	-0.592881	0.0771634	4.16326	-218.605
14	242.754	-20.195	1777.23	243.799	-60.6003	1730.57	-238.807	119.656	1668.72	-0.512517	0.141632	3.65757	249.871	-27.4344	1803.64	-256.404	-34.6628	1632.35	259.074	-33.461	1808.09	-0.60031	0.0205758	4.11325	176.196	-30.0274	1921.33	-214.94	77.3555	2106.69	148.193	-24.3826	1986.03	-0.350061	0.0855247	3.90353	239.314	9.58964	1809.96	287.616	-14.3087	1799.47	-201.809	44.243	1771.86	-0.599642	0.0402883	4.42798	-261.586
15	209.148	-13.7208	1886.4	203.584	-73.7866	1853.06	-255.207	96.1033	1757.69	-0.471945	0.129734	3.88411	278.869	-17.973	1930.41	-243.528	-33.4954	1750.89	263.95	-25.908	1924.46	-0.61678	0.00814611	4.39695	211.345	-29.2565	2070.88	-260.969	61.615	2271.4	165.912	-22.9014	2121.62	-0.414252	0.0738463	4.19551	241.679	29.5404	1910.43	273.209	-3.83324	1898.18	-185.662	39.3091	1874.42	-0.576447	0.0111923	4.67627	-288.544
16	219.091	8.87347	2009.28	185.426	-90.3349	1995.24	-249.608	56.7533	1859.98	-0.462185	0.0976582	4.14367	300.1	-13.2406	2054.77	-246.488	-25.2039	1872.53	271.791	-19.2151	2040.3	-0.641904	0.0056881	4.68075	233.3	-29.8336	2206.18	-297.33	38.2774	2421.58	182.998	-20.6402	2253.96	-0.463193	0.0576055	4.4667	238.514	47.5944	2004.55	264.181	8.61131	1998.71	-176.519	31.9847	1981.29	-0.55889	-0.0199302	4.92438	-298.029
17	253.543	35.8653	2140.85	200.609	-99.7539	2147.56	-234.726	11.143	1976.05	-0.486739	0.053015	4.42628	312.997	-12.2948	2174.64	-257.248	-15.6661	1995.78	281.796	-14.9427	2153.63	-0.668307	0.00907622	4.96034	244.382	-31.4093	2329.27	-324.331	16.7963	2560.78	198.388	-19.4988	2385.34	-0.4979	0.0439447	4.72222	235.58	66.331	2095.24	264.517	23.6619	2102.89	-177.956	22.0956	2092.28	-0.557934	-0.0558693	5.17606	-290.102
18	294.863	56.9578	2276.43	246.354	-98.379	2301.93	-224.713	-30.6663	2105.48	-0.541182	0.0075991	4.72259	317.54	-13.9779	2288.2	-268.513	-9.84797	2119.15	293.004	-14.2751	2262.67	-0.689497	0.0144362	5.2317	248.59	-33.6011	2443.89	-342.297	4.92383	2692.04	211.13	-20.9965	2517.52	-0.520563	0.0386334	4.96761	233.484	85.0513	2184.47	270.231	39.6623	2207.62	-185.791	11.2136	2203.76	-0.567359	-0.0933933	5.42738	-274.319
19	333.701	70.2836	2413.36	300.368	-92.0187	2452.19	-231.815	-59.6882	2247.03	-0.611807	-0.0268165	5.02553	313.991	-17.0853	2393.84	-277.371	-7.32486	2241.27	303.493	-16.1732	2366.85	-0.701889	0.0203414	5.49206	249.644	-36.0086	2553.52	-351.678	0.352579	2815.52	220.942	-24.4041	2649.16	-0.533704	0.0394408	5.20435	232.101	102.591	2274.06	277.251	54.9307	2309.73	-195.754	0.929701	2312.06	-0.580196	-0.128852	5.67424	-263.941
20	363.741	77.0624	2549.75	339.014	-87.1521	2592.37	-252.17	-76.0261	2392.81	-0.67472	-0.0465886	5.32395	304.987	-20.0158	2492.18	-282.516	-5.69789	2360.8	310.989	-18.7837	2466.03	-0.704742	0.0259635	5.74075	248.913	-38.0802	2659.61	-352.961	-2.90886	2930.29	227.785	-28.1686	2777.81	-0.538504	0.0411119	5.4312	231.299	117.811	2365.77	282.492	68.2058	2407.05	-204.572	-7.60902	2414.62	-0.591104	-0.159325	5.91418	-269.774
21	379.176	78.6519	2683.49	349.698	-86.9912	2718.05	-273.811	-84.3543	2531.53	-0.708466	-0.0537097	5.60526	294.358	-20.9683	2584.91	-282.788	-2.72248	2476.47	313.411	-20.3627	2560.21	-0.698518	0.030283	5.97807	246.584	-39.1881	2762.6	-346.788	-10.4073	3035.8	231.6	-30.8031	2901.19	-0.535462	0.038674	5.64662	230.712	130.211	2459.43	285.47	79.3294	2500.02	-211.588	-14.42	2511.86	-0.598844	-0.184285	6.14775	-285.422
22	380.58	78.0895	2809.84	341.281	-88.4025	2827.87	-284.816	-89.3532	2652	-0.711286	-0.0558473	5.85725	285.904	-18.1627	2673.72	-278.834	1.86785	2587.66	311.108	-20.5606	2650.85	-0.686979	0.0318381	6.20604	242.833	-38.7109	2862.89	-335.685	-22.026	3136.01	232.049	-31.6698	3019.79	-0.526113	0.0313855	5.85374	229.73	139.959	2552.89	286.121	88.3219	2589.45	-216.57	-19.7093	2604.65	-0.602672	-0.204058	6.3746	-297.166
23	372.88	79.5601	2922.25	325.082	-87.5264	2920.82	-280.71	-93.7075	2750.03	-0.691499	-0.0605821	6.07161	280.676	-11.3999	2758.94	-272.535	6.98806	2694.22	306.089	-19.9802	2740.44	-0.674001	0.0300945	6.42673	237.621	-36.5173	2960.88	-323.47	-33.7793	3237.97	228.605	-30.7105	3135.91	-0.512566	0.0217103	6.05888	227.735	147.254	2643.9	284.39	95.2068	2676.16	-219.291	-23.6887	2693.85	-0.601845	-0.219001	6.59423	-293.205
24	361.042	87.1369	3014.35	309.645	-82.6193	2998.5	-269.293	-96.8103	2833.01	-0.66416	-0.0715952	6.25021	275.192	-3.08769	2838.64	-265.761	11.5551	2796	300.363	-19.238	2831.42	-0.659896	0.0265747	6.64045	230.557	-33.284	3056.86	-313.891	-41.6856	3348.55	220.759	-27.8893	3251.83	-0.496671	0.0126488	6.2682	224.146	152.325	2730.43	280.351	100.056	2760.26	-219.664	-26.6648	2779.89	-0.595875	-0.229613	6.80543	-276.696
25	348.357	100.228	3087.98	295.835	-77.7841	3069.72	-259.51	-97.748	2909.42	-0.638528	-0.0849239	6.40655	265.547	4.12296	2910.7	-259.104	15.4607	2893.01	294.785	-18.7888	2923.92	-0.642734	0.02363	6.84561	221.217	-29.763	3151.17	-307.503	-44.521	3466.56	208.78	-23.5623	3367.36	-0.478687	0.00571459	6.48099	218.714	155.617	2812.24	274.182	102.981	2841.29	-217.712	-29.0226	2862.84	-0.584723	-0.236669	7.00769	-257.733
26	336.05	112.483	3155.05	283.203	-78.125	3144.53	-258.571	-95.7441	2986.71	-0.620243	-0.0919263	6.5614	248.824	7.8883	2973.94	-251.579	19.8006	2985.39	288.789	-18.8874	3015.2	-0.619011	0.024158	7.03927	209.308	-26.601	3243.9	-300.911	-44.4659	3580.78	193.9	-18.5687	3479.23	-0.45702	0.000456775	6.68793	211.344	157.681	2889.96	266.068	104.095	2918.79	-213.462	-31.1496	2942.78	-0.568485	-0.241034	7.20118	-245.373
27	325.215	117.211	3228.06	271.227	-86.8964	3230.23	-263.126	-90.8598	3066.07	-0.607344	-0.0856181	6.72961	228.113	7.73285	3032.99	-242.106	25.7411	3073.32	281.721	-19.7753	3102.35	-0.589792	0.0296359	7.22291	195.333	-23.8027	3333.86	-290.487	-43.9081	3679.46	177.405	-13.7748	3584.03	-0.430477	-0.00410902	6.87839	201.942	159.066	2964.19	256.199	103.553	2992.45	-207.005	-33.2655	3019.72	-0.547314	-0.243468	7.38619	-239.574
28	316.21	111.27	3314.12	259.091	-99.9542	3323.02	-265.856	-83.4705	3146.34	-0.594335	-0.0669731	6.9127	208.762	3.88307	3094.66	-230.096	33.6149	3157.25	273.025	-21.4261	3183.4	-0.558373	0.0401263	7.40069	180.096	-21.1322	3419.39	-274.407	-44.4952	3757.49	160.151	-9.33527	3680.01	-0.398952	-0.00910494	7.04685	190.494	160.161	3035.44	244.787	101.669	3062.54	-198.681	-34.9192	3093.53	-0.521655	-0.244179	7.56322	-235.708
29	307.718	99.5827	3408.02	245.907	-111.304	3416.36	-259.569	-73.9747	3226.38	-0.574577	-0.043986	7.10154	195.996	-3.40701	3165.6	-216.07	41.8603	3238.32	262.377	-23.2052	3258.46	-0.529007	0.0537071	7.57879	164.382	-18.3579	3498.86	-254.959	-46.193	3824.97	142.01	-3.78902	3769.33	-0.364354	-0.0156075	7.20021	177.237	160.835	3103.8	232.053	98.8	3129.47	-188.895	-35.4919	3164.03	-0.492216	-0.242845	7.73255	-229.414
30	298.193	88.1854	3502.86	230.795	-115.908	3504.08	-241.838	-63.5724	3305.09	-0.544642	-0.0253307	7.28616	190.504	-12.9397	3246.16	-200.706	48.6537	3317.76	249.48	-24.3937	3327.93	-0.502532	0.0674449	7.75878	148.363	-15.4308	3572.24	-234.995	-48.7351	3894.09	122.715	4.54839	3854.7	-0.328476	-0.0245689	7.34811	162.457	160.852	3169.28	218.217	95.2984	3193.67	-178.046	-34.383	3231.03	-0.459742	-0.239065	7.89439	-219.209
31	286.168	81.9416	3592.43	212.939	-114.295	3582.31	-216.205	-54.4677	3381.49	-0.505417	-0.0156252	7.4587	187.29	-22.335	3328.87	-184.594	52.5812	3396.38	234.099	-24.3836	3392.35	-0.475309	0.0778869	7.93585	131.444	-12.5307	3641.47	-216.818	-51.827	3974.09	102.139	16.6161	3938.35	-0.29234	-0.0362909	7.49926	146.441	159.983	3231.88	203.518	91.3643	3255.15	-166.389	-31.6023	3294.58	-0.424876	-0.232825	8.04879	-205.183
32	270.527	80.5457	3673.51	191.542	-109.016	3648	-186.592	-48.9281	3454.58	-0.458323	-0.014455	7.61405	181.001	-29.1382	3405.75	-167.96	54.033	3473.09	216.251	-23.0546	3452.85	-0.44333	0.0833194	8.10378	112.977	-9.85171	3708.63	-200.303	-55.0502	4061.27	80.7582	30.0683	4020.48	-0.255757	-0.0488532	7.65275	129.363	158.227	3291.47	188.219	87.0158	3313.51	-154.005	-27.8941	3354.92	-0.388045	-0.22475	8.19549	-187.499
33	250.25	82.2683	3743.71	166.085	-102.618	3699.1	-156.684	-48.4287	3523.44	-0.404878	-0.01984	7.74841	167.458	-31.5909	3470.78	-150.929	53.8959	3546.32	196.025	-20.421	3510.72	-0.403484	0.0830699	8.25761	92.574	-7.4779	3775.35	-184.657	-57.9523	4148.35	59.2172	41.6551	4100.73	-0.218378	-0.0597982	7.80466	111.241	155.91	3347.66	172.587	82.2601	3368.28	-140.964	-24.0468	3412.33	-0.34954	-0.215765	8.33404	-166.89
34	224.653	85.3797	3801.33	138.437	-97.6231	3742.19	-129.13	-50.9285	3587.38	-0.347788	-0.0273336	7.86474	147.705	-31.0237	3526.65	-133.536	52.9979	3614.68	173.558	-16.5408	3567.03	-0.356726	0.0788772	8.39922	70.9843	-5.00459	3841.26	-169.045	-60.1339	4228.53	38.0775	48.4643	4178.58	-0.18051	-0.0672392	7.95001	92.0834	153.381	3400.05	156.845	77.1632	3419.11	-127.321	-20.7641	3466.98	-0.309597	-0.206789	8.46394	-144.43
35	196.029	88.1448	3850.83	111.698	-96.5412	3788.28	-106.293	-53.4115	3645.81	-0.292534	-0.0318062	7.97357	124.231	-29.6233	3578.45	-115.028	51.6402	3678.78	149.43	-11.8669	3620.79	-0.304872	0.0730479	8.53228	49.2724	-1.89169	3905.45	-152.243	-61.6729	4299.07	17.1652	50.606	4251.85	-0.141939	-0.0716487	8.08502	71.9249	150.979	3448.28	140.963	72.1553	3466.08	-113.036	-18.2261	3518.3	-0.268186	-0.198603	8.58449	-121.186
36	168.242	88.8258	3899.9	88.7662	-101.579	3847.56	-90.3365	-52.9762	3698.2	-0.245423	-0.0284204	8.08714	99.4782	-29.4801	3631.09	-94.2365	49.8464	3740.24	124.453	-7.0598	3669.91	-0.249558	0.067758	8.66032	28.4613	2.35961	3966.99	-132.828	-62.898	4359.4	-4.08071	49.7818	4317.54	-0.102039	-0.0746683	8.20676	51.1112	148.904	3492.14	124.815	67.8051	3509.46	-98.033	-16.4137	3565.47	-0.225427	-0.191824	8.6951	-98.0898
37	145.008	85.7837	3955.91	69.6963	-110.847	3918.32	-79.2186	-49.1467	3745.25	-0.207677	-0.0170165	8.20996	74.8625	-30.6303	3685.07	-70.0605	47.6348	3800.61	99.4263	-2.76555	3712.43	-0.191658	0.0635573	8.78336	8.68197	7.3703	4024.79	-109.452	-64.1329	4409.01	-26.1945	47.6851	4372.77	-0.0596751	-0.0773611	8.31232	30.1896	147.27	3531.57	108.273	64.6788	3549.53	-82.2339	-15.3072	3607.64	-0.1816	-0.186998	8.79522	-75.9862
38	126.609	79.4871	4018.77	52.4891	-119.504	3990.28	-66.8791	-43.7661	3788.87	-0.1738	-0.00264895	8.33604	50.8193	-31.1469	3736.71	-42.925	44.9652	3859.03	74.8216	0.715773	3748.22	-0.132216	0.059138	8.89776	-10.7867	11.9222	4077.58	-82.5156	-65.5394	4448	-49.0724	45.5378	4417.97	-0.0147056	-0.0798349	8.40124	9.71017	146.191	3566.51	91.1966	63.0947	3586.18	-65.5227	-14.8819	3644.38	-0.136946	-0.184456	8.88435	-55.6269
39	110.034	72.4258	4081.19	35.0888	-122.783	4053.18	-47.097	-38.7702	3831.03	-0.135817	0.00818665	8.45438	27.7447	-29.0245	3782.15	-14.7181	41.7411	3912.35	50.7973	3.41586	3779.02	-0.0731496	0.0528265	8.99938	-30.7	14.7638	4124.07	-54.0878	-67.125	4477.11	-71.9979	44.1101	4456.75	0.0315513	-0.0817817	8.47548	-9.88688	145.706	3597.01	73.4181	62.9342	3618.64	-47.7135	-15.1037	3675.88	-0.0915375	-0.184108	8.96208	-36.57
40	92.1466	67.1645	4135.66	15.1664	-119.108	4101.85	-16.1553	-35.757	3872.67	-0.0872389	0.0114366	8.55667	5.56164	-22.9804	3818.4	12.6268	37.8656	3957.34	27.4963	5.38158	3806.6	-0.0160254	0.0435041	9.08473	-51.6978	15.2251	4163.31	-26.2933	-68.8892	4497.09	-94.2395	44.1492	4492.81	0.077657	-0.0832516	8.53732	-28.6559	145.531	3623.69	54.7681	64.0344	3646.07	-28.6131	-15.9375	3702.41	-0.0450306	-0.185555	9.02844	-17.539
41	70.2746	65.7499	4177.16	-9.87969	-110.098	4136.17	21.5113	-35.2235	3911.52	-0.0274739	0.00644724	8.6377	-17.3483	-14.0851	3845.19	38.3127	33.4035	3992.79	4.83262	6.8091	3831.57	0.0398678	0.0319074	9.15314	-74.0433	14.5302	4195.41	-0.180183	-70.7167	4508.79	-115.84	46.0228	4527.49	0.12313	-0.0852029	8.58825	-46.7889	145.289	3647.35	35.1101	66.2214	3667.7	-8.08222	-17.3456	3724.23	0.00295939	-0.188314	9.08365	2.74657
42	42.5588	69.3265	4205.08	-42.5896	-97.528	4156.32	59.812	-37.4434	3944.63	0.0422831	-0.00653007	8.69506	-42.9165	-3.88749	3862.83	63.5206	28.7005	4020.95	-17.6781	8.15445	3852.56	0.0973511	0.0191647	9.20552	-97.9236	14.2881	4220.66	25.0773	-72.2926	4513.22	-138.192	49.4382	4558.04	0.169532	-0.0882854	8.62735	-64.4787	144.61	3668.76	14.6373	69.2153	3683.24	13.4913	-19.2627	3741.36	0.0521131	-0.191796	9.12816	25.3713
43	7.22147	78.9485	4219.25	-82.1619	-83.9195	4164.88	92.9954	-42.6157	3969.28	0.118658	-0.0265985	8.72853	-72.8761	6.09321	3871.71	89.629	24.1305	4044.39	-40.5602	9.89964	3867.98	0.159276	0.00638286	9.24297	-123.487	16.0076	4239.38	50.4923	-73.2818	4511.44	-162.82	54.0363	4581.3	0.218605	-0.0930281	8.65343	-81.9727	143.574	3688.01	-6.27022	72.6759	3692.72	35.42	-21.608	3753.75	0.101756	-0.195721	9.162	51.2715
44	-35.799	94.2696	4220.83	-123.16	-72.8324	4167.77	119.993	-49.9077	3985.84	0.197098	-0.0504101	8.74339	-106.224	14.7425	3873.52	117.549	20.0624	4064.81	-64.191	12.3841	3876.78	0.225868	-0.0055409	9.26732	-150.344	19.8197	4251.71	76.8403	-73.5104	4504.33	-190.744	59.6678	4594.76	0.271263	-0.0993059	8.66556	-99.6226	143.114	3703.9	-27.2306	76.2628	3696.15	57.0139	-24.3005	3761.31	0.151295	-0.20051	9.18411	81.2571
45	-80.9038	110.325	4215.43	-159.828	-67.8813	4171.13	143.148	-57.7352	3996.94	0.271237	-0.0707836	8.74979	-139.965	21.2413	3870.88	146.648	16.8483	4080.94	-88.4645	15.4771	3879.65	0.294196	-0.0155853	9.28014	-177.716	24.8507	4257.67	104.113	-73.3353	4492.32	-221.307	66.8745	4598.19	0.326569	-0.107135	8.66387	-117.791	144.262	3715.04	-47.931	79.7466	3693.72	77.8421	-27.2887	3764.18	0.200417	-0.206779	9.19364	114.117
46	-121.328	121.201	4209.54	-189.246	-70.0277	4178.61	164.883	-64.4984	4005.26	0.335943	-0.0817297	8.75679	-171.058	24.7787	3866.4	175.976	14.8367	4090.9	-113.175	18.9507	3877.66	0.36097	-0.0226622	9.28287	-204.814	30.2045	4257.3	132.139	-73.223	4475.74	-253.509	76.3405	4591.78	0.38325	-0.116681	8.6487	-136.822	147.979	3720.16	-68.24	83.1907	3686.02	98.1549	-30.5988	3763.03	0.249502	-0.215396	9.19057	146.982
47	-151.484	122.154	4208.72	-214.004	-75.0802	4189.04	187.35	-69.1325	4012.59	0.390617	-0.0821074	8.76877	-197.524	25.0845	3861.8	204.658	14.254	4093.11	-138.08	22.5561	3871.66	0.42376	-0.0261872	9.2763	-231.09	35.1789	4250.5	160.648	-73.5293	4454.81	-286.348	88.2772	4575.62	0.440123	-0.127857	8.62021	-156.7	154.031	3718.87	-88.0554	86.7055	3673.75	118.313	-34.2695	3758.6	0.29875	-0.226288	9.17577	177.047
48	-173.478	116.117	4212.32	-237.32	-78.258	4200.68	212.047	-71.8629	4018.62	0.440083	-0.0775264	8.7838	-219.934	23.1924	3856.57	232.301	14.5266	4088.19	-162.702	25.9052	3861.27	0.482332	-0.0271162	9.26019	-256.567	39.5387	4236.89	188.701	-73.8875	4429.18	-318.813	99.8062	4548.89	0.49594	-0.138402	8.57739	-177.097	161.144	3711.64	-107.277	90.3836	3657.56	138.65	-38.325	3751.62	0.348084	-0.238505	9.15075	203.627
49	-192.511	109.109	4217.2	-261.791	-76.3943	4210.57	240.38	-73.1057	4022.73	0.490841	-0.0747693	8.79713	-239.236	20.3286	3849.88	258.707	14.76	4077.58	-186.466	28.5543	3845.58	0.536824	-0.0267646	9.23431	-281.355	43.1176	4216.06	215.095	-73.6407	4398.27	-349.888	106.808	4510.46	0.549331	-0.145109	8.51887	-197.677	168.012	3698.95	-125.839	94.0144	3637.89	159.062	-42.5465	3742.1	0.397089	-0.250618	9.11629	227.923
50	-213.584	106.827	4220.08	-288.287	-70.7816	4212.39	273.381	-73.2463	4024.21	0.547769	-0.0772218	8.8015	-256.407	17.6539	3840.87	283.721	14.1164	4062.68	-208.85	30.0861	3823.75	0.587469	-0.026373	9.19844	-305.532	45.7683	4187.63	238.728	-72.1723	4361.53	-378.593	105.488	4459.44	0.598994	-0.14502	8.44345	-218.126	173.513	3681.19	-143.702	97.1357	3614.99	179.084	-46.5131	3729.47	0.445089	-0.260976	9.07244	251.17
51	-238.806	110.33	4216.08	-317.383	-63.4766	4199.22	308.555	-72.3831	4021.81	0.611001	-0.0842491	8.78767	-272.691	15.7095	3828.82	307.765	12.5831	4043.82	-230.057	30.467	3795.89	0.635735	-0.0263493	9.15234	-328.895	47.5231	4151.6	259.975	-69.4538	4318.88	-404.4	96.7402	4398.95	0.644699	-0.138717	8.35312	-238.27	177.68	3658.3	-160.829	99.2774	3589.09	198.236	-49.7979	3713.15	0.491516	-0.26887	9.01887	273.968
52	-268.129	117.229	4199.12	-348.958	-56.579	4167	341.455	-70.4553	4013.93	0.677276	-0.092635	8.74735	-289.477	14.6937	3813.01	331.696	10.7606	4020.55	-250.83	29.9483	3762.78	0.683964	-0.0265753	9.09571	-351.082	48.5132	4108.19	280.31	-65.8938	4270.57	-427.125	84.9424	4335.07	0.687049	-0.129391	8.25212	-257.985	180.996	3629.99	-177.17	100.086	3560.31	216.149	-52.0691	3692.64	0.535924	-0.274133	8.95501	296.303
53	-301.409	125.051	4163.28	-380.107	-52.363	4123.05	367.646	-67.4027	3999	0.741305	-0.0989838	8.68043	-308.144	14.7964	3792.76	356.356	9.26018	3992.41	-271.91	28.7884	3725.21	0.734483	-0.0269229	9.02829	-371.734	48.8697	4057.62	301.198	-61.9063	4216.87	-446.6	74.4992	4273.83	0.726651	-0.120256	8.1447	-277.152	183.943	3595.99	-192.624	99.6726	3528.18	232.882	-53.3744	3667.79	0.578181	-0.277292	8.88015	318.139
54	-336.587	131.42	4110.65	-407.229	-53.1461	4077.55	385.609	-63.3677	3976.88	0.798016	-0.10008	8.59546	-328.869	15.7136	3767.85	381.618	8.51605	3959.31	-293.446	27.2563	3683.41	0.787446	-0.0270243	8.95001	-390.58	48.5583	4000.84	322.609	-57.6752	4157.73	-463.075	67.3912	4217.06	0.763474	-0.112694	8.03262	-295.63	186.691	3556.38	-207.076	98.2642	3492.1	248.605	-53.8564	3638.55	0.618216	-0.278791	8.7938	339.426
55	-369.032	134.087	4054.13	-427.488	-60.4728	4039.21	399.102	-58.8599	3949.98	0.844789	-0.0936023	8.50943	-349.653	16.2481	3738.99	406.054	8.72472	3921.6	-314.791	25.6352	3636.87	0.839657	-0.0260082	8.86129	-407.512	47.2467	3940.13	342.509	-53.0761	4092.68	-477.362	62.3412	4160.96	0.796654	-0.10558	7.91458	-313.235	188.609	3512.18	-220.42	96.0865	3451.48	263.482	-53.6562	3604.85	0.655924	-0.278412	8.69628	360.099
56	-393.938	130.817	4007.34	-442.532	-71.3728	4008.06	412.44	-54.4274	3921.02	0.88244	-0.0804582	8.4339	-368.267	15.1086	3706.96	428.148	10.0656	3879.69	-335.24	24.2084	3585	0.887625	-0.0229437	8.7626	-422.44	44.5711	3877.9	358.723	-47.9627	4021.23	-490.314	57.8447	4101.29	0.825274	-0.0976058	7.78907	-329.773	188.935	3464.55	-232.766	93.3097	3406.21	277.532	-52.8554	3566.88	0.691252	-0.275737	8.58859	380.1
57	-408.906	120.876	3977.33	-455.63	-81.2416	3981.07	429.331	-50.5005	3892.11	0.914206	-0.0636864	8.3732	-382.999	11.3929	3671.97	446.992	12.5523	3833.58	-354.126	23.0516	3527.77	0.928775	-0.0171714	8.6541	-435.284	40.2596	3816.05	370.15	-42.2697	3943.45	-502.404	52.964	4035	0.848874	-0.0879442	7.65543	-345.049	186.93	3414.61	-244.485	90.0377	3356.78	290.603	-51.4643	3525.08	0.724219	-0.27025	8.47243	399.533
58	-417.53	107.269	3954.8	-469.766	-85.984	3954.84	449.405	-46.7102	3861.4	0.944471	-0.0480436	8.31705	-395.63	6.83205	3630.33	463.202	15.7861	3782.28	-370.879	21.7221	3466.47	0.964537	-0.0100147	8.53313	-446.025	34.6617	3753.27	378.35	-36.1324	3860.84	-513.161	48.1729	3961.92	0.86815	-0.0772175	7.51362	-358.778	182.492	3362.94	-255.964	86.3706	3303.69	302.528	-49.4891	3479.9	0.754774	-0.261955	8.34905	418.679
59	-424.323	93.5754	3927.94	-485.401	-85.9578	3923.29	470.595	-42.3564	3825.39	0.97529	-0.0353101	8.25033	-409.391	4.24916	3576.75	477.626	19.3053	3724.66	-384.941	19.698	3402.61	0.997674	-0.0036409	8.39582	-454.67	28.3846	3686.83	385.291	-29.7165	3775.13	-521.974	44.1611	3882.31	0.883987	-0.066375	7.36319	-370.571	176.255	3309.4	-267.491	82.3853	3247.32	313.22	-46.9497	3431.73	0.782761	-0.251455	8.21898	437.815
60	-433.278	82.9036	3886.84	-501.701	-83.8133	3878.9	490.845	-36.7518	3780.63	1.00744	-0.0253249	8.15831	-427.449	6.40603	3506.06	490.98	22.7004	3659.84	-395.991	16.6556	3337.22	1.03098	-0.000283371	8.23824	-461.232	22.0316	3614.09	392.492	-23.2137	3687.63	-528.411	41.4723	3796.35	0.897099	-0.0562856	7.20339	-380.035	168.898	3253.84	-278.745	78.0178	3187.12	323.041	-43.952	3380.56	0.80789	-0.23934	8.08163	456.613
61	-445.889	76.0909	3830.88	-517.781	-82.1377	3814.9	508.805	-29.822	3726.17	1.0404	-0.0167988	8.03507	-449.956	13.2073	3419.41	503.331	25.816	3588.09	-404.869	13.2337	3269.05	1.06528	-0.000490211	8.06053	-466.035	15.9922	3533.95	399.283	-16.9417	3597.78	-532.932	39.9417	3703.84	0.907558	-0.0473011	7.03301	-386.86	161.044	3196.06	-289.17	73.1504	3122.2	332.529	-40.6345	3326.22	0.829892	-0.226143	7.93595	474.007
62	-462.888	73.2851	3762.23	-532.223	-82.4023	3734.2	524.089	-22.3339	3664.52	1.07342	-0.00933858	7.88597	-472.931	20.638	3326.61	514.551	28.5742	3510.07	-412.762	10.3628	3196.15	1.0983	-0.00190332	7.86936	-469.824	10.3626	3447.53	404.327	-11.2558	3504.47	-536.262	39.1894	3604.42	0.915453	-0.0394683	6.85182	-391.501	152.866	3135.53	-298.214	67.6666	3051.66	342.218	-37.1352	3268.52	0.849124	-0.212022	7.78062	488.912
63	-484.625	74.3769	3683.23	-543.228	-85.2741	3646.68	536.38	-15.1153	3598.4	1.10524	-0.00298037	7.72161	-492.092	24.3992	3238.1	524.5	30.8956	3426.48	-420.746	8.88345	3116.77	1.12739	-0.00187231	7.67211	-473.377	5.21785	3356.07	406.467	-6.44773	3406.68	-539.052	38.8037	3497.85	0.920958	-0.032758	6.65982	-394.812	144.295	3071.51	-305.652	61.5879	2975.1	352.21	-33.5412	3207.12	0.866191	-0.197009	7.61442	501.099
64	-507.627	76.6902	3597.81	-549.071	-91.3392	3562.13	545.566	-8.81988	3530.16	1.13211	0.0041187	7.55329	-503.967	21.1652	3161.86	532.913	32.6887	3338.91	-428.77	8.73655	3030.89	1.1496	0.00218598	7.47627	-477.234	0.596887	3260.74	406.304	-2.17265	3304.72	-541.194	38.054	3384.72	0.924746	-0.0264972	6.45834	-397.653	135.258	3003.27	-311.828	55.1786	2892.95	361.852	-29.849	3141.39	0.881545	-0.181262	7.43659	511.472
65	-526.222	76.0742	3510.77	-550.009	-99.729	3483.61	552.532	-3.24459	3460.09	1.15083	0.0144213	7.3868	-509.076	12.401	3093.75	539.457	33.8552	3249.41	-436.138	9.3461	2939.56	1.16452	0.00949712	7.281	-480.781	-3.63936	3162.21	405.45	2.28026	3199.64	-542.146	36.0266	3266.12	0.927113	-0.0195415	6.2492	-400.623	125.747	2930.06	-317.149	48.7277	2805.72	370.414	-26.0462	3070.68	0.895413	-0.164999	7.24639	521
66	-534.926	68.5368	3426.81	-548.279	-108.12	3407.48	558.466	2.07665	3387.89	1.15995	0.0294356	7.22267	-509.163	1.04287	3025.88	543.812	34.3072	3159.91	-442.157	10.1343	2843.78	1.17272	0.0181423	7.08244	-483.048	-7.68452	3061.02	405.47	7.59835	3092.45	-541.365	31.8332	3143.14	0.92809	-0.0107423	6.03412	-403.388	115.97	2851.05	-321.954	42.5008	2713.87	377.231	-22.1176	2994.4	0.907251	-0.148597	7.04303	529.989
67	-533.489	54.4709	3347.28	-546.193	-114.149	3329.83	564.522	7.59522	3313.2	1.16174	0.0475332	7.05884	-505.957	-10.0195	2950.61	546.1	34.2247	3069.7	-446.409	10.6336	2743.85	1.17534	0.0263628	6.87427	-483.087	-11.7289	2957.66	406.378	13.7773	2983.02	-538.434	25.2743	3016.93	0.926802	0.000150508	5.81409	-405.405	106.184	2765.38	-325.938	36.535	2617.16	382.292	-18.0196	2912.69	0.916352	-0.132264	6.82573	537.797
68	-527.129	38.8424	3270.06	-545.6	-116.505	3246.71	570.884	13.3932	3234.43	1.16133	0.0643371	6.88989	-500.779	-19.0795	2865.8	546.896	34.0668	2975.29	-448.765	10.4912	2639.35	1.17375	0.033457	6.65173	-480.52	-15.8791	2851.43	406.575	20.0911	2870.07	-533.066	16.8688	2888.7	0.92178	0.0123981	5.5886	-406.133	96.6465	2672.22	-328.43	30.7373	2514.99	385.953	-13.6928	2826.12	0.922015	-0.116085	6.59376	543.717
69	-521.298	26.8093	3192.82	-547.708	-115.338	3154.16	576.726	19.1663	3148.72	1.16282	0.0760935	6.70936	-494.524	-25.6675	2775.08	546.792	34.304	2873.08	-449.107	9.36124	2529.83	1.16903	0.0396967	6.41449	-475.567	-20.1541	2740.45	404.395	25.784	2752.26	-524.983	7.16907	2759.65	0.911903	0.0251637	5.35634	-405.185	87.5656	2571.41	-328.755	25.0134	2406.75	388.578	-9.07755	2735.24	0.923662	-0.100105	6.34696	547.616
70	-519.261	21.0407	3111.48	-553.656	-110.912	3048.24	581.175	24.5919	3053.15	1.16873	0.0808762	6.50952	-488.065	-29.3721	2682.36	545.812	35.2416	2761.8	-447.171	7.08183	2415.79	1.16168	0.0451258	6.16503	-468.472	-24.5688	2622.76	398.932	30.5288	2628.95	-513.969	-3.30518	2629.81	0.896604	0.0379073	5.11564	-402.407	79.0774	2463.85	-326.371	19.2367	2292.09	390.242	-4.17279	2640.18	0.920784	-0.0843312	6.08588	550.242
71	-520.13	19.4774	3018.54	-562.331	-104.445	2928.25	583.417	29.4271	2945.98	1.17706	0.080828	6.28335	-482.071	-30.0443	2590.45	542.893	36.8703	2644.68	-442.41	3.84016	2299.59	1.15095	0.0494731	5.90994	-459.436	-29.0885	2497.32	390.733	34.8122	2500.83	-499.933	-14.0957	2496.98	0.876307	0.050625	4.86484	-397.667	71.3112	2350.55	-321.082	13.196	2171.34	390.272	0.869512	2539.87	0.912556	-0.0688211	5.81076	552.409
72	-522.549	19.5318	2906.15	-568.233	-99.0025	2799.83	582.849	33.7167	2829.66	1.18254	0.0799747	6.03102	-476.469	-28.4804	2498.2	536.854	39.1455	2525.46	-434.248	-0.137485	2183.8	1.13542	0.0531509	5.65324	-448.481	-33.5005	2366.38	380.505	39.2122	2368.73	-482.796	-24.7511	2358.71	0.851435	0.0632605	4.60437	-390.82	64.3598	2232.29	-312.748	6.66656	2044.96	387.874	5.87237	2433.08	0.898091	-0.0536118	5.52159	554.105
73	-524.924	18.9182	2770.54	-565.366	-97.8582	2669.34	578.915	37.5699	2707.62	1.17941	0.0823223	5.75677	-471.018	-25.6899	2403.6	526.846	41.9771	2406.69	-422.337	-4.60856	2069.67	1.11395	0.0566901	5.39637	-435.591	-37.5514	2232.96	368.773	44.0761	2233.29	-462.605	-34.6949	2213.63	0.822347	0.0755011	4.33569	-381.578	57.8284	2107.16	-301.196	-0.566587	1913.22	382.297	10.6684	2318.62	0.876392	-0.0383393	5.21603	553.932
74	-524.779	16.4491	2622.89	-550.462	-102.398	2541.08	571.135	41.0887	2583.18	1.16328	0.0897609	5.47389	-465.44	-22.6708	2304.57	513.234	45.1084	2286.79	-407.167	-9.27138	1953.73	1.087	0.0604354	5.13372	-420.745	-41.0062	2099.92	355.404	48.9149	2094.42	-439.849	-42.8972	2064.18	0.789264	0.086208	4.0622	-369.549	50.9754	1971.25	-285.719	-8.55251	1773.25	373.483	15.2484	2196.46	0.846506	-0.0223605	4.88852	550.367
75	-519.438	11.1862	2477.74	-527.795	-108.789	2413.77	560.207	44.2558	2458.2	1.13577	0.100233	5.19308	-458.873	-20.2353	2198.59	496.66	48.2452	2163.23	-389.418	-13.8107	1831.43	1.05493	0.064546	4.85774	-403.833	-43.9145	1967.71	340.118	53.0494	1951.87	-415.12	-48.2247	1913.72	0.752315	0.0942372	3.7862	-354.338	43.0518	1820.67	-265.165	-17.2027	1619.63	361.954	19.7347	2067.52	0.807591	-0.00503123	4.5321	542.753
76	-506.598	2.44592	2347.65	-502.93	-112.305	2285.16	547.769	46.9587	2333.43	1.10034	0.110802	4.92213	-449.992	-19.0478	2082.73	477.664	51.1494	2033.78	-369.676	-17.9927	1698.91	1.01758	0.0691728	4.56138	-384.673	-46.5531	1834.89	322.694	55.8943	1805.41	-388.988	-49.774	1764.64	0.711608	0.0988019	3.50817	-335.303	33.4221	1653.06	-238.366	-26.4244	1446.81	348.25	24.2536	1932.73	0.758601	0.014199	4.14107	532.012
77	-486.651	-8.60994	2230.59	-480.354	-109.53	2152.52	535.483	49.0822	2209.55	1.06161	0.118154	4.65817	-437.459	-19.7678	1954.04	456.059	53.99	1898.59	-347.845	-22.1715	1557.36	0.973676	0.0752432	4.24339	-363.081	-49.2047	1699.96	303.354	57.5425	1655.11	-361.855	-48.3031	1612.53	0.66743	0.100638	3.2243	-310.557	22.0182	1473.93	-204.634	-35.9816	1254.01	332.477	28.8787	1792.05	0.697502	0.0352525	3.71927	519.231
78	-461.171	-20.0075	2118.13	-460.246	-102.303	2011.31	523.641	50.4507	2084.17	1.02103	0.122068	4.39035	-420.581	-22.7007	1812.29	431.338	57.1149	1758.87	-323.53	-26.96	1410.21	0.921977	0.0837506	3.90719	-338.753	-51.8684	1561.46	282.519	58.3856	1501.15	-334.048	-45.3014	1450	0.620067	0.100966	2.92899	-277.824	8.94924	1291.27	-165.185	-45.0634	1059.31	313.003	33.4734	1641.42	0.622084	0.05726	3.28481	504.934
79	-431.769	-29.7762	2001.69	-441.705	-93.7743	1856.5	508.882	50.7269	1946.74	0.976729	0.123139	4.10158	-400.387	-27.2095	1664.35	403.026	60.8543	1615.64	-296.351	-32.8823	1260.76	0.862612	0.0948654	3.56159	-311.063	-53.7888	1418.1	260.577	58.7743	1343.88	-305.823	-42.1974	1270.49	0.569532	0.10045	2.61734	-234.849	-5.67218	1113.03	-121.71	-52.7157	885.496	287.768	37.8487	1475.8	0.530183	0.0791881	2.85884	488.524
80	-400.518	-36.0628	1870.75	-423.285	-86.6125	1684.84	487.248	49.5472	1785.34	0.926347	0.121687	3.77374	-378.186	-32.5019	1518.29	371.191	65.2336	1467.19	-266.15	-39.0088	1110.28	0.79654	0.107257	3.21255	-279.331	-54.0863	1268.56	237.419	58.3815	1186.03	-276.257	-39.3821	1081.59	0.514714	0.0985608	2.29522	-182.213	-21.1721	947.045	-75.9525	-58.0032	754.825	254.77	41.8209	1290.53	0.422069	0.0995616	2.46229	469.264
81	-369.867	-37.1083	1713.22	-400.339	-80.6814	1503.4	455.067	46.7318	1590.51	0.86574	0.116246	3.39657	-355.083	-37.8491	1381.23	336.341	70.0314	1309.58	-232.953	-43.2323	958.357	0.725045	0.118527	2.86226	-243.074	-52.0282	1112.41	212.532	56.331	1032.29	-243.474	-36.4063	902.299	0.45375	0.0939625	1.9777	-126.456	-35.7001	800.841	-31.3454	-60.618	671.237	214.13	45.3871	1093.5	0.306043	0.116602	2.11108	444.093
82	-342.193	-31.2302	1517.38	-367.06	-74.8284	1322.98	411.754	44.0689	1378.84	0.792068	0.106075	2.98116	-329.965	-43.1994	1250.1	298.993	75.0126	1139	-196.814	-43.4478	804.679	0.647703	0.1268	2.50508	-203.904	-48.4535	957.993	185.407	51.7545	887.403	-205.621	-32.816	751.755	0.386151	0.0863416	1.68572	-74.8657	-47.257	681.906	6.64499	-61.0078	616.617	168.516	48.7621	907.745	0.194798	0.129209	1.81542	404.95
83	-315.539	-20.5491	1293.43	-318.667	-68.1514	1154.04	358.593	44.5403	1182.77	0.701481	0.0941438	2.56502	-300.379	-48.9119	1115.71	259.532	79.5749	960.876	-158.884	-39.4179	655.172	0.563795	0.131698	2.14268	-164.701	-45.1553	819.047	156.385	45.0128	756.327	-163.37	-29.1655	638.242	0.314445	0.0774555	1.43679	-34.4942	-53.9285	597.231	32.4298	-59.6656	571.536	120.75	52.1737	757.21	0.101058	0.136402	1.58479	343.157
84	-281.607	-12.7516	1083.59	-259.296	-61.9386	1004.09	296.917	51.1239	1034.8	0.591977	0.0888963	2.20625	-263.867	-55.3473	968.809	218.145	82.58	794.146	-121.924	-33.6391	524.908	0.473703	0.13457	1.79451	-128.361	-43.9304	709.3	127.045	38.2655	644.316	-121.094	-27.4837	554.174	0.244374	0.0711894	1.23828	-7.39117	-55.583	543.403	41.7509	-57.112	519.287	73.8281	55.7085	660.829	0.0324765	0.138571	1.41819	258.899
85	-231.603	-15.9594	932.639	-197.678	-58.6059	879.078	230.793	64.0389	948.451	0.466387	0.0979334	1.95025	-219.842	-62.3259	810.317	175.006	82.8479	658.822	-88.8187	-28.8234	429.676	0.379369	0.136477	1.48936	-97.0381	-45.3803	633.473	99.0634	33.8136	556.641	-83.4569	-29.9153	490.706	0.181452	0.0708192	1.09096	9.16002	-53.7884	507.088	38.5585	-54.0392	459.954	31.8067	58.5835	606.668	-0.013093	0.136931	1.29492	173.187
86	-163.73	-33.1833	863.534	-142.322	-60.2885	784.091	169.722	78.0193	899.549	0.336167	0.12117	1.79975	-171.444	-68.593	661.276	131.21	79.8285	565.73	-61.7116	-26.6231	376.106	0.285794	0.137298	1.25742	-71.4195	-47.7282	578.352	73.9085	32.8824	494.481	-53.9682	-37.1988	439.933	0.129357	0.0764662	0.981887	18.0658	-50.18	474.557	29.9312	-51.2048	400.021	-0.84982	59.684	571.034	-0.0401936	0.132535	1.18952	109.991
87	-95.2901	-53.4784	839.765	-98.2287	-65.1813	712.411	123.849	87.1502	859.441	0.224242	0.145419	1.70397	-122.253	-72.7669	545.119	90.3559	74.6922	500.623	-40.7095	-25.7963	345.81	0.198693	0.135895	1.09148	-52.0187	-48.9162	528.607	52.472	33.7597	447.834	-32.9826	-46.2348	396.523	0.0892294	0.0836717	0.891146	22.0815	-46.2871	433.919	22.9142	-49.3603	345.952	-19.7201	57.9063	530.339	-0.0532513	0.126351	1.0781	83.0151
88	-46.8154	-63.5395	814.76	-67.8687	-68.6394	648.815	101.37	86.3005	801.663	0.152657	0.154371	1.60055	-75.8129	-73.6533	481.061	56.471	68.9005	445.016	-25.576	-24.6119	316.172	0.123819	0.131118	0.974371	-39.132	-47.1757	470.806	35.5485	34.2367	404.804	-20.3214	-53.2746	355.576	0.0616626	0.087421	0.799122	22.9009	-42.8924	386.218	21.1272	-48.7233	301.366	-24.0681	53.1699	472.655	-0.0560329	0.119137	0.954701	79.6772
89	-33.7423	-53.2672	748.964	-53.4037	-66.1152	578.218	95.7419	76.2621	716.266	0.129223	0.138236	1.44384	-35.4051	-71.4763	456.471	32.6953	63.6982	383.741	-15.8651	-21.7467	269.235	0.0658593	0.123083	0.870206	-31.4174	-42.9261	405.867	23.6674	32.5349	355.651	-15.3426	-55.1072	312.43	0.0457121	0.0847475	0.697065	21.7612	-40.4575	338.061	22.1545	-48.5706	264.867	-19.6532	47.1967	406.594	-0.0523076	0.112092	0.830684	83.2568
90	-44.2167	-29.7321	640.423	-51.1463	-56.7372	492.915	93.6873	60.5332	600.846	0.133577	0.103867	1.22532	-4.18789	-67.1074	444.167	17.4267	59.1715	319.407	-10.0093	-18.0645	211.988	0.0248046	0.113217	0.765192	-26.7841	-37.5861	341.269	15.9371	29.1814	302.168	-14.9227	-51.4012	263.685	0.0374147	0.0766994	0.588783	19.8972	-39.4424	296.073	22.9663	-48.0834	234.548	-12.8955	41.892	342.855	-0.0458813	0.106491	0.718739	81.3749
91	-57.2858	-5.72905	499.719	-51.5614	-43.3103	392.593	82.0554	42.615	453.277	0.134886	0.0647601	0.950752	14.7292	-61.4112	417.176	7.4814	55.0199	260.549	-6.06704	-15.1576	159.742	-0.00092616	0.103213	0.656876	-23.1568	-32.5697	284.448	10.9922	25.4723	249.994	-15.1107	-42.7853	206.361	0.0319729	0.0654436	0.480831	18.0837	-39.8145	263.854	20.8272	-46.4709	208.402	-9.66113	38.9525	291.166	-0.0399675	0.103052	0.628181	73.7806
92	-53.7336	6.94156	338.377	-45.0154	-28.7862	277.458	56.5963	25.3871	284.571	0.109762	0.0333725	0.636199	20.9688	-54.6605	364.175	-0.115962	50.8994	214.813	-2.24989	-14.4319	126.371	-0.0147733	0.0941169	0.553256	-19.5242	-28.7274	238.762	7.55326	22.6182	204.378	-12.3098	-30.0556	138.504	0.0255649	0.0528349	0.377525	15.7718	-40.1253	236.297	15.897	-43.2205	183.431	-10.3699	38.0256	251.672	-0.0345915	0.0998703	0.552461	62.3242
93	-33.8356	7.64311	178.39	-28.9339	-15.5291	156.9	26.4403	10.7961	125.488	0.0630329	0.0132002	0.325571	18.2591	-46.2391	297.368	-5.99829	45.9854	179.867	1.51339	-15.1981	109.661	-0.0202136	0.0842581	0.460337	-16.474	-26.0638	201.437	5.30894	20.871	166.173	-6.8886	-15.8744	69.6294	0.0186098	0.0407674	0.283797	12.176	-38.6729	206.739	9.97855	-37.9772	156.073	-12.3508	37.5953	219.084	-0.0283927	0.0940067	0.478813	49.1062
94	-10.0857	2.73751	48.3065	-10.5379	-5.08768	53.0476	1.82126	0.711268	8.41691	0.0158589	0.00216312	0.0775608	10.6669	-35.4574	230.9	-9.33041	39.1509	147.115	4.21777	-15.4541	97.3077	-0.0189934	0.0706414	0.372825	-14.7261	-24.5135	169.193	4.55434	19.8815	133.478	-1.7017	-4.073	16.4425	0.0136188	0.031459	0.207126	6.54281	-33.8006	168.689	4.89233	-30.3889	122.765	-12.8994	36.1335	188.053	-0.0200236	0.0825506	0.394562	36.9899
95	5.12384	-1.43159	-24.108	2.26292	1.05889	-11.149	-8.99913	-3.51255	-41.5757	-0.0115778	-0.00221852	-0.0542876	1.91288	-22.1065	176.786	-9.29825	29.3295	108.165	4.87684	-13.2411	77.2005	-0.0126188	0.0507302	0.284057	-14.7338	-23.8793	139.13	5.56475	19.2854	104.386	0.439134	1.61649	-4.81683	0.0128901	0.0269676	0.154932	-0.68827	-25.5241	121.964	1.84727	-20.6986	82.7304	-10.4112	32.6442	155.015	-0.00952053	0.0648955	0.295986	28.9838
96	7.86962	-2.19876	-37.027	5.54297	2.59374	-27.3091	-8.54105	-3.33375	-39.4594	-0.0155117	-0.0026346	-0.0733386	-6.17756	-8.60468	135.387	-6.36564	17.3428	63.2289	3.53257	-8.46371	47.3324	-0.00291833	0.0269908	0.192913	-15.4936	-23.2439	110.434	7.76253	18.5495	78.0344	-0.91225	0.896034	5.29558	0.0156869	0.0265451	0.125766	-7.55806	-15.9904	74.4166	0.44724	-10.7098	42.5022	-6.16816	27.5279	121.096	0.000775666	0.0446215	0.19585	26.6222
97	3.83695	-1.07204	-18.0531	3.11375	1.45703	-15.3408	-2.98977	-1.16697	-13.8126	-0.00702362	-0.00109656	-0.0333547	-12.4227	1.7364	103.108	-2.44649	6.15564	22.285	1.39377	-3.14085	17.1631	0.00673175	0.00592984	0.111815	-15.5067	-21.445	82.9972	9.60214	16.9487	54.7447	-3.51777	-2.63612	27.1659	0.0185806	0.0266311	0.107036	-12.0087	-7.48463	34.4249	0.036093	-2.47938	9.79917	-1.91975	21.4116	88.1788	0.00827202	0.0258173	0.108948	26.5211
98	-0.784723	0.21925	3.69217	-0.326188	-0.152634	1.60706	1.58406	0.618292	7.31832	0.00190418	0.000389797	0.00891517	-15.6733	5.70325	76.4469	0.472741	-1.1623	-4.19874	-0.271245	0.600944	-3.26166	0.0128771	-0.00585643	0.0541103	-13.322	-17.3656	56.7479	9.49216	13.7522	34.9037	-5.00164	-5.18195	40.2128	0.0180543	0.023561	0.0855888	-12.2263	-2.08995	9.55868	-0.022501	2.05188	-8.10517	0.665832	14.9242	58.1298	0.0106268	0.0123117	0.0490281	24.2718
99	-2.16066	0.603685	10.166	-1.48486	-0.694816	7.31562	2.61134	1.01926	12.0643	0.00442091	0.000784569	0.0208763	-15.7226	3.02011	54.9021	1.30165	-3.20029	-11.5609	-0.746849	1.65464	-8.98069	0.013939	-0.00617687	0.0269511	-8.91788	-11.236	32.6795	6.83503	8.91415	18.9011	-4.12116	-4.61764	33.5191	0.0128996	0.016076	0.0552354	-8.88054	0.168596	-0.828082	-0.031675	2.88842	-11.4096	1.28703	8.73028	32.5263	0.00839243	0.00466824	0.0166945	17.0161
100	-1.34492	0.375768	6.32793	-0.956305	-0.447486	4.71152	1.5306	0.597426	7.07134	0.00270745	0.000472796	0.0127965	-13.443	-3.22644	41.4019	0.810223	-1.99204	-7.19614	-0.464882	1.02995	-5.5901	0.0115443	0.000160363	0.022445	-3.90912	-4.82855	13.0041	3.09673	3.812	7.13399	-1.98635	-2.29539	16.233	0.00583654	0.00709816	0.0236073	-4.09215	0.467905	-2.17947	-0.01808	1.64868	-6.51251	0.776191	3.52393	12.7063	0.00402079	0.00115803	0.0033032	7.55939
101	0	0	0	0	0	0	0	0	0	0	0	0	-9.76562	-9.76562	39.0625	0	0	0	0	0	0	0.00765977	0.00765977	0.0306391	0	0	0	0	0	0	0	0	0	0	0	0	2.1e-05	-3e-06	1.5e-05	0	0	0	0	0	0	-1.72798e-08	2.46855e-09	1.23427e-08	0
[truncated: 74 more columns]

## Sheet: RFGRF
	RFGRF_Z	RFGRF_Z	RFGRF_Z	RFGRF_Z	RFGRF_Z	RFGRF_Z	RFGRF_Z	RFGRF_Z	RFGRF_Z				RFGRF_Z	RFGRF_Z	RFGRF_Z	RFGRF_Z	RFGRF_Z	RFGRF_Z	RFGRF_Z	RFGRF_Z	RFGRF_Z				RFGRF_Z	RFGRF_Z	RFGRF_Z	RFGRF_Z	RFGRF_Z	RFGRF_Z	RFGRF_Z	RFGRF_Z	RFGRF_Z				RFGRF_Z	RFGRF_Z	RFGRF_Z	RFGRF_Z	RFGRF_Z	RFGRF_Z	RFGRF_Z	RFGRF_Z	RFGRF_Z				RFGRF_Z
	LINK_MODEL_BASED	LINK_MODEL_BASED	LINK_MODEL_BASED	LINK_MODEL_BASED	LINK_MODEL_BASED	LINK_MODEL_BASED	LINK_MODEL_BASED	LINK_MODEL_BASED	LINK_MODEL_BASED				LINK_MODEL_BASED	LINK_MODEL_BASED	LINK_MODEL_BASED	LINK_MODEL_BASED	LINK_MODEL_BASED	LINK_MODEL_BASED	LINK_MODEL_BASED	LINK_MODEL_BASED	LINK_MODEL_BASED				LINK_MODEL_BASED	LINK_MODEL_BASED	LINK_MODEL_BASED	LINK_MODEL_BASED	LINK_MODEL_BASED	LINK_MODEL_BASED	LINK_MODEL_BASED	LINK_MODEL_BASED	LINK_MODEL_BASED				LINK_MODEL_BASED	LINK_MODEL_BASED	LINK_MODEL_BASED	LINK_MODEL_BASED	LINK_MODEL_BASED	LINK_MODEL_BASED	LINK_MODEL_BASED	LINK_MODEL_BASED	LINK_MODEL_BASED				LINK_MODEL_BASED
	PROCESSED	PROCESSED	PROCESSED	PROCESSED	PROCESSED	PROCESSED	PROCESSED	PROCESSED	PROCESSED				PROCESSED	PROCESSED	PROCESSED	PROCESSED	PROCESSED	PROCESSED	PROCESSED	PROCESSED	PROCESSED				PROCESSED	PROCESSED	PROCESSED	PROCESSED	PROCESSED	PROCESSED	PROCESSED	PROCESSED	PROCESSED				PROCESSED	PROCESSED	PROCESSED	PROCESSED	PROCESSED	PROCESSED	PROCESSED	PROCESSED	PROCESSED				PROCESSED
ITEM	X	Y	Z	X	Y	Z	X	Y	Z	Horse 2			X	Y	Z	X	Y	Z	X	Y	Z	Horse 10			X	Y	Z	X	Y	Z	X	Y	Z	Horse 7			X	Y	Z	X	Y	Z	X	Y	Z	Horse 5			X
1	263.672	-107.422	302.734	283.203	-107.422	1279.3	-517.578	-83.0078	1123.05	-0.752109	0.0931511	1.91132	4.88281	9.76562	273.438	-258.789	0	683.594	317.383	-53.7109	625	-0.455756	0.034469	1.24088	-19.5312	9.76562	48.8281	-146.484	78.125	166.016	39.0625	9.76562	292.969	-0.107755	0.0380313	0.329604	455.262	-3.15712	820.437	490.363	-75.0829	857.5	-152.288	85.5915	352.755	-0.903416	0.134809	1.67095	-4.88281
2	457.721	-42.7928	456.544	252.611	-68.4827	1306.99	-650.104	-48.4706	1130.14	-0.961242	0.044376	2.04458	101.945	10.5341	344.234	-282.036	-13.1792	797.112	292.967	-41.594	698.823	-0.530972	0.0140249	1.44336	-55.0034	14.0815	182.673	-136.591	61.895	193.934	80.6595	12.0111	482.964	-0.105309	0.0232381	0.55792	422.035	35.8892	976.377	459.907	-49.7737	897.661	-91.6768	49.8742	404.858	-0.801141	0.0524638	1.87519	-37.6972
3	643.289	59.9767	628.876	189.931	6.31519	1177.35	-750.388	8.09626	1021.51	-1.11893	-0.0411192	1.99799	228.032	7.24177	420.299	-276.687	-26.4918	844.522	230.378	-14.1442	713.682	-0.576582	-0.0153652	1.55186	-70.8298	31.5363	389.644	-101.187	33.9976	242.173	141.119	8.44772	689.752	-0.1113	-0.00388558	0.857787	313.936	81.4117	1058.86	349.176	-7.31507	838.107	-6.06521	-8.31539	444.363	-0.550632	-0.0678126	1.92656	-99.2672
4	740.281	156.58	815.678	171.066	93.3729	1088.04	-814.201	66.4526	936.735	-1.21922	-0.129656	2.00697	334.439	-1.67781	551.244	-284.804	-28.9444	903.628	222.427	16.3015	767.736	-0.660173	-0.0341731	1.74333	-21.4655	77.1471	656.493	-94.0682	34.1309	387.417	220.973	-5.444	885.496	-0.19055	-0.0243869	1.25231	222.406	108.118	1127.74	261.867	24.854	829.112	30.083	-55.3411	535.98	-0.373729	-0.154953	2.05122	-195.504
5	688.682	209.467	1012.49	258.443	169.734	1208.9	-837.301	106.468	1014.2	-1.26082	-0.192705	2.28616	387.896	-17.5883	755.353	-329.782	-14.4549	1025.26	321.498	38.8322	922.463	-0.815089	-0.0280007	2.12019	101.588	151.768	952.23	-132.219	54.8574	619.907	300.593	-29.3741	1046.43	-0.346862	-0.0438358	1.69962	221.39	96.1606	1231.18	274.674	26.1711	980.112	-36.8517	-65.3777	724.586	-0.438509	-0.154456	2.41578	-312.268
6	545.764	220.533	1212.45	406.196	217.607	1486.12	-814.186	116.753	1295.15	-1.2479	-0.227082	2.82184	395.651	-41.3216	968.71	-372.38	6.58137	1169.78	444.346	47.3214	1116.27	-0.950941	0.000456202	2.5529	209.622	219.089	1199.29	-205.525	54.4149	866.68	325.927	-54.8403	1155.73	-0.481007	-0.0712898	2.0911	282.69	57.4803	1349.06	345.998	6.19973	1221.63	-169.169	-46.8187	968.182	-0.656516	-0.0909237	2.91196	-393.372
7	411.248	205.951	1407.85	516.304	221.686	1758.2	-737.202	100.883	1654.59	-1.17626	-0.230874	3.40611	371.494	-73.5687	1114.64	-360.271	20.3232	1278.6	479.378	36.6507	1261.81	-0.949973	0.0448978	2.86688	199.107	237.094	1313.43	-282.826	15.3267	1063.59	245.168	-72.9151	1200.22	-0.471937	-0.0966153	2.32187	341.131	15.5255	1436.53	401.857	-17.2495	1435.21	-304.17	-17.4259	1200.98	-0.861652	-0.0129203	3.35123	-379.844
8	372.141	180.552	1589.23	495.771	168.161	1871.05	-598.484	63.9031	1951.18	-1.03611	-0.201237	3.82357	327.438	-110.249	1165.79	-271.754	17.884	1322.74	368.931	6.75944	1309.67	-0.759358	0.0952009	2.97916	47.9853	191.217	1284.09	-291.957	-29.56	1167.11	92.2985	-80.4465	1212.2	-0.280553	-0.0910837	2.37779	338.725	-8.62065	1456.26	383.95	-29.7992	1528.79	-387.312	7.64143	1367.36	-0.913351	0.0379015	3.58137	-288.827
9	404.26	147.306	1732.14	350.845	70.5847	1821.02	-392.717	11.3638	2052.99	-0.811015	-0.145926	3.96113	272.371	-138.876	1181.65	-171.559	4.36082	1356.67	207.554	-28.1393	1317.43	-0.510998	0.134421	3.0243	-122.271	115.255	1230.62	-178.728	-47.0398	1155.05	-31.7097	-78.7919	1259.42	-0.0160625	-0.0541988	2.36591	280.461	-14.5985	1436.61	309.241	-33.5523	1537.06	-403.22	25.7141	1460.54	-0.817025	0.0607796	3.64869	-225.454
10	426.171	103.077	1804.36	175.241	-33.3686	1737.03	-153.892	-43.3659	1972.74	-0.533675	-0.0798945	3.89611	215.057	-146.512	1229.48	-139.415	-12.7051	1449.37	116.273	-51.3576	1361.32	-0.369234	0.145236	3.16895	-178.422	47.3954	1282.79	-30.0918	-38.8202	1121.82	-42.4452	-70.0064	1396.45	0.123826	-0.0105208	2.46714	203.759	-12.7189	1439.8	217.249	-35.5495	1532.69	-348.252	37.8656	1488.35	-0.632984	0.0708752	3.67059	-287.308
11	362.517	45.6017	1779.2	64.9375	-105.513	1751.44	53.1419	-80.7817	1836.69	-0.264478	-0.0147461	3.79238	170.738	-133.565	1340.28	-214.566	-27.2345	1634.32	163.295	-53.6443	1486.23	-0.430299	0.125478	3.4989	-81.1553	8.16849	1478.99	17.2679	-19.8065	1201.84	42.8303	-59.3492	1599.4	0.0360835	0.0203639	2.77816	145.019	-12.6682	1524.2	144.993	-40.6805	1578.98	-228.448	44.8128	1466.38	-0.426614	0.0807721	3.76005	-427.168
12	226.851	-14.792	1705.27	68.5764	-127.962	1924.73	162.711	-81.2142	1774.14	-0.0937736	0.0434819	3.8184	162.465	-116.531	1501.38	-339.726	-36.6335	1860.37	290.888	-43.4774	1662.47	-0.62206	0.0967704	3.9408	95.6435	-3.17481	1747.46	-68.7096	-2.17213	1415.68	171.841	-53.1712	1817.42	-0.218212	0.0351625	3.23272	123.214	-14.459	1692.76	116.332	-42.5138	1689.96	-100.774	45.3917	1450.99	-0.280032	0.0842305	3.97741	-504.392
13	96.8062	-58.7063	1685.53	159.286	-115.207	2202.73	123.908	-31.4942	1890.37	-0.0933967	0.100629	4.083	211.55	-112.01	1696.96	-443.738	-38.8306	2064.22	423.132	-31.8972	1849.53	-0.84587	0.0824176	4.40082	273.287	10.7323	2011.99	-208.654	4.84855	1662.68	298.042	-54.7799	2010.79	-0.506261	0.0317369	3.69025	144.754	-11.1317	1908.46	150.812	-30.9076	1863.54	-38.8825	37.8222	1511.88	-0.2752	0.0657139	4.34783	-409.848
14	48.9615	-67.2984	1819.88	303.439	-84.6337	2521.02	-31.5209	45.1761	2156.13	-0.271267	0.13927	4.59059	302.281	-122.263	1902.29	-484.47	-33.7275	2209.2	508.431	-26.5924	2017.42	-1.01589	0.0903018	4.80728	405.628	36.8884	2231.97	-330.784	-2.2046	1860.68	388.147	-60.4809	2165.51	-0.729914	0.0138822	4.06197	214.825	4.02864	2133.83	258.825	0.826351	2091.9	-99.5542	21.5465	1701.61	-0.47166	0.0137346	4.8773	-219.423
15	103.14	-39.0914	2111.3	465.846	-50.8539	2824.38	-243.1	112.95	2495.4	-0.573795	0.143359	5.25057	388.225	-137.657	2085.26	-478.488	-25.2162	2312.45	544.391	-28.474	2157.5	-1.10681	0.110528	5.14165	473.52	53.689	2396.33	-402.475	-9.82177	2001.03	412.211	-65.7261	2272.03	-0.836132	0.00143792	4.32887	316.827	28.5793	2341.27	397.957	39.4303	2334.38	-242.12	3.06561	1973.77	-0.787388	-0.0534391	5.47146	-73.2799
16	222.41	10.0251	2465.81	606.623	-20.1518	3085.29	-450.385	136.041	2832.22	-0.903997	0.103278	5.92339	426.583	-149.029	2217.26	-449.401	-17.6498	2397.55	534.66	-37.6109	2263.81	-1.10645	0.13255	5.39531	462.918	41.988	2497.98	-403.364	-3.32203	2091.11	376.724	-69.0851	2341.28	-0.806794	0.0154316	4.49827	412.374	50.9195	2513.06	506.892	64.5059	2538.57	-391.025	-8.59272	2246.49	-1.07817	-0.102048	6.00525	-66.4887
17	367.453	63.5018	2786.23	685.013	2.74204	3281.36	-608.645	97.5422	3113.82	-1.17369	0.0221145	6.4873	419.383	-155.376	2306.32	-417.36	-13.7246	2482.7	491.49	-52.0846	2340.57	-1.04181	0.151959	5.59217	401.858	9.35226	2560.54	-361.391	12.2072	2160.74	325.917	-72.3569	2405.45	-0.706942	0.0488176	4.62572	462.742	59.2443	2632.36	534.977	59.5979	2661.87	-480.54	-6.18253	2448.87	-1.21638	-0.102876	6.3714	-164.224
18	502.724	109.099	3021.62	670.734	14.1567	3397.52	-709.703	24.4572	3341.39	-1.33058	-0.0698077	6.89649	394.095	-160.325	2381.32	-396.567	-13.2836	2576.91	441.952	-66.5534	2409.49	-0.966814	0.167535	5.77895	342.264	-21.4899	2624.96	-331.436	20.608	2252.05	300.916	-77.2028	2494.05	-0.632591	0.0774341	4.78431	456.822	50.5361	2701.99	499.351	33.3069	2724.06	-507.527	6.22453	2579.78	-1.2044	-0.0638682	6.58758	-308.586
19	597.913	140.555	3185.18	595.461	16.6844	3461.9	-750.568	-49.9798	3523.79	-1.37353	-0.146415	7.18642	375.476	-166.94	2467.9	-400.395	-15.8802	2688.09	414.245	-75.418	2493.77	-0.93348	0.17764	6.00018	328.135	-31.1635	2725.87	-340.077	14.5745	2382.64	305.07	-83.0437	2608.06	-0.631725	0.083588	5.00858	421.825	33.9701	2752.08	443.632	4.02253	2769.29	-493.299	20.1353	2665.32	-1.11805	-0.0146938	6.73641	-450.124
20	623.306	152.103	3294.85	513.557	15.2107	3518.44	-728.964	-93.4893	3669.96	-1.31834	-0.184276	7.40714	369.726	-174.458	2570.53	-429.565	-20.6741	2816.42	418.913	-77.3103	2603.1	-0.955512	0.181262	6.26708	352.879	-22.0639	2857.35	-369.539	0.721714	2531.9	324.008	-88.2503	2735.1	-0.679201	0.0720698	5.27325	387.69	19.5867	2814.69	406.997	-12.0868	2836.99	-458.938	28.1976	2730.81	-1.03154	0.0170311	6.89751	-552.476
21	574.566	144.222	3372.51	475.906	14.3674	3608.39	-660.645	-97.7797	3790.73	-1.20902	-0.181142	7.61089	375.977	-180.664	2685.55	-466.187	-26.2463	2950.6	440.527	-77.0869	2727.37	-1.00609	0.181583	6.56002	390.625	-4.88281	2998.05	-400.446	-13.5831	2678.84	345.062	-91.561	2864.45	-0.737427	0.0537821	5.5439	373.143	13.4442	2907.65	397.19	-14.5001	2933.33	-423.503	31.0859	2795.52	-0.982346	0.0264478	7.10654	-582.843
22	496.65	129.52	3447.63	489.195	15.548	3738.42	-580.281	-79.7341	3898.99	-1.10658	-0.158838	7.83234	392.175	-183.945	2808.76	-491.217	-31.1544	3078.62	461.824	-79.9907	2854.99	-1.05513	0.182584	6.85717	419.771	10.8004	3130.83	-423.644	-23.0258	2816.1	361.226	-92.8871	2990.97	-0.781893	0.0383345	5.80129	375.127	13.8667	3021.3	408.572	-9.35972	3050.33	-405.193	32.8929	2876.19	-0.978278	0.0233573	7.3627	-552.148
23	440.155	121.995	3550.57	529.917	17.9334	3891.63	-523.438	-57.4281	4007.68	-1.05527	-0.139446	8.09013	411.59	-185.123	2933.77	-497.938	-34.8052	3195.25	474.413	-87.219	2978.48	-1.08551	0.186315	7.14357	435.95	19.9209	3255.61	-433.414	-23.1864	2940.53	366.73	-92.3783	3110.69	-0.802308	0.0319802	6.04075	388.082	18.2904	3142.79	434.855	-2.38421	3179.63	-418.924	37.0918	2986.5	-1.02186	0.0174325	7.65982	-509.133
24	437.442	130.233	3698.34	574.234	20.6655	4050.8	-520.654	-47.1693	4128.26	-1.0827	-0.139949	8.3922	426.33	-185.632	3053.66	-495.149	-37.6744	3303.83	481.077	-94.8732	3095.57	-1.10011	0.190467	7.41461	439.108	18.5485	3376.58	-432.254	-14.7209	3054.68	361.524	-90.5564	3223.23	-0.800226	0.037183	6.26641	406.236	24.4306	3261.56	465.13	4.15454	3310.47	-454.399	42.2958	3117.01	-1.0909	0.0112819	7.97262	-498.418
25	470.5	147.879	3871.17	607.146	23.0112	4203.57	-562.533	-51.2252	4260.03	-1.1589	-0.15694	8.71536	431.646	-186.301	3164.14	-492.426	-40.2839	3408.14	485.25	-98.8636	3204.44	-1.10542	0.192075	7.66848	431.318	5.91386	3496.17	-429.459	-2.49363	3165.8	353.419	-88.4544	3333.2	-0.788095	0.0519558	6.48753	423.234	30.7747	3373.43	486.345	9.58261	3430.99	-489.627	44.8653	3247.56	-1.15133	0.00370941	8.27125	-521.994
26	512.695	166.016	4042.97	624.564	24.3916	4343.66	-620.634	-65.1683	4396.53	-1.24207	-0.180582	9.03218	431.049	-186.39	3267.84	-493.683	-42.5784	3509.74	488.793	-98.6482	3306.79	-1.10871	0.190176	7.90978	420.233	-10.4594	3612.24	-430.288	9.30282	3278.01	350.091	-87.013	3444.95	-0.779277	0.0693042	6.70824	432.616	35.9424	3475.25	487.3	13.3366	3531.02	-504.895	41.6452	3360.07	-1.1724	-0.00628148	8.52993	-561.523
27	542.03	177.623	4192.82	623.095	24.2391	4465.16	-666.404	-84.5294	4531.26	-1.2941	-0.202355	9.3191	429.362	-184.912	3368.5	-496.718	-43.8793	3607.75	491.863	-97.5154	3408.1	-1.11218	0.187108	8.14508	414.348	-21.7628	3721.94	-430.269	18.3071	3387.9	351.255	-85.7117	3555.99	-0.776202	0.0816406	6.92284	430.07	38.9469	3565.33	472.585	15.7163	3614.98	-500.314	33.699	3454.84	-1.15443	-0.0172503	8.75112	-600.586
28	555.069	183.266	4320.4	603.759	22.2892	4566.49	-679.723	-104.769	4659.13	-1.29906	-0.219265	9.5712	429.278	-181.654	3468.41	-499.064	-43.5509	3701.26	494.493	-98.7894	3513.73	-1.11602	0.18581	8.37964	416.619	-24.3631	3824.17	-424.544	22.8263	3491.58	351.614	-83.1098	3659.48	-0.774193	0.084573	7.12366	419.847	40.3756	3647.69	454.757	17.4568	3694.64	-486	24.2177	3541.41	-1.11957	-0.0276598	8.95566	-630.931
29	553.016	185.404	4430.57	577.605	18.9666	4655.96	-667.529	-121.119	4779.59	-1.27052	-0.22998	9.79737	429.737	-177.777	3567.26	-499.044	-42.4524	3791.05	495.944	-102.68	3622.78	-1.1175	0.186681	8.61313	420.244	-23.7448	3920.91	-415.181	24.1289	3589.03	347.038	-78.2492	3750.79	-0.767497	0.0818622	7.30897	408.346	41.2096	3727.76	445.199	19.2376	3780.55	-471.468	16.1796	3628.57	-1.09028	-0.0364255	9.16397	-646.376
30	537.876	186.119	4528.59	557.069	14.7915	4743.21	-642.169	-128.767	4892.99	-1.22739	-0.23294	10.0084	429.31	-174.536	3664.47	-495.713	-42.8268	3879.45	494.762	-106.512	3728.55	-1.11362	0.186851	8.84168	417.593	-26.1806	4014.42	-407.157	24.7201	3681.96	338.794	-72.3273	3835.03	-0.755218	0.0799833	7.48466	400.881	42.3146	3809.8	443.705	21.1812	3871.42	-459.891	10.4097	3717.37	-1.07339	-0.0436818	9.37932	-644.885
31	516.333	185.287	4622.19	551.248	10.2405	4835.71	-615.876	-123.009	4999.69	-1.18948	-0.225068	10.2153	427.051	-171.901	3759.06	-488.237	-46.7992	3968.66	489.559	-107.66	3824.47	-1.10191	0.182569	9.06108	406.605	-33.3348	4105.38	-401.627	25.2849	3772.19	329.6	-67.1161	3919.89	-0.73853	0.081611	7.65735	396.455	43.883	3891.13	443.715	23.1059	3959.46	-450.972	6.55342	3804.61	-1.06241	-0.0497292	9.59047	-633.121
32	496.765	181.984	4719.98	554.522	5.60093	4931.36	-595.52	-104.264	5099.62	-1.16358	-0.206212	10.4226	422.591	-168.283	3849.56	-477.107	-53.8303	4057.45	480.397	-105.991	3909.57	-1.08249	0.172907	9.26846	391.919	-41.3169	4192.61	-395.121	24.3084	3861.7	320.919	-63.4013	4008.48	-0.71914	0.0837469	7.82955	391.788	45.8637	3966.55	439.049	24.8279	4037.3	-444.235	4.2712	3887.11	-1.04919	-0.0546539	9.78447	-618.721
33	486.48	175.573	4829.11	557.22	1.10728	5025.4	-580.438	-80.1441	5192.13	-1.14756	-0.181464	10.6315	415.612	-162.106	3934.56	-463.867	-61.2646	4141.9	468.491	-103.348	3987.32	-1.0573	0.160159	9.46235	378.347	-46.0896	4274.83	-385.255	20.8138	3951.06	311.899	-60.1572	4095.38	-0.698072	0.0824708	7.99733	383.882	48.1769	4031.45	428.148	26.181	4102.71	-437.766	3.50655	3962.32	-1.02839	-0.0583	9.95357	-605.79
34	483.441	167.914	4943.82	550.63	-3.00216	5113.44	-569.399	-58.7999	5276.53	-1.13296	-0.158068	10.8344	406.116	-153.536	4014.25	-449.983	-66.5335	4218.3	455.028	-101.537	4061.11	-1.0284	0.147883	9.64266	366.858	-46.6969	4351.7	-374.368	16.1458	4036.05	301.479	-56.2048	4174.57	-0.676786	0.0772698	8.15379	372.225	50.4976	4086.27	412.204	27.0091	4156.51	-428.795	4.37127	4028.04	-0.998299	-0.0601794	10.097	-594.343
35	480.805	162.157	5051.72	534.624	-6.45742	5194.37	-561.07	-47.7471	5352.27	-1.1139	-0.143749	11.0213	394.361	-144.185	4090.13	-435.604	-68.8806	4286.34	440.466	-101.173	4132.03	-0.996476	0.138422	9.81117	355.233	-44.7403	4423.65	-365.5	11.9916	4111.75	289.266	-51.0679	4244.67	-0.655557	0.0699693	8.29512	357.587	52.3747	4134.06	392.485	27.1612	4199.72	-414.849	6.92621	4082.32	-0.958553	-0.0597467	10.2166	-584.04
36	472.084	161.207	5141.22	513.593	-8.97191	5268.84	-552.868	-47.1084	5420.6	-1.08709	-0.14085	11.1854	380.631	-135.537	4163.53	-419.982	-68.7815	4348.01	424.764	-102.067	4199.59	-0.961137	0.132418	9.97011	341.325	-41.7977	4491.05	-357.926	8.17183	4177.25	275.423	-44.8593	4308.18	-0.632629	0.0615503	8.42261	340.754	53.3941	4177.73	370.749	26.5431	4235.27	-397.087	10.6134	4125.63	-0.912202	-0.0570429	10.3174	-573.05
37	456.158	164.527	5212.3	491.842	-10.2771	5337.43	-541.412	-52.237	5483.92	-1.05237	-0.145897	11.3289	365.359	-127.387	4233.54	-402.417	-66.8153	4405.13	407.883	-104.029	4263.22	-0.92214	0.129106	10.1197	324.638	-38.4561	4553.77	-348.506	3.31438	4234.29	260.152	-37.7712	4367.33	-0.605772	0.0516279	8.53873	322.595	53.6622	4218.16	349.07	25.0976	4267.3	-379.007	14.4758	4160.01	-0.864544	-0.052896	10.4053	-558.584
38	435.778	169.101	5273.33	470.984	-10.4937	5399.79	-523.304	-58.4069	5544.64	-1.01044	-0.153336	11.459	349.061	-118.57	4298.01	-382.86	-64.3738	4457.19	389.871	-107.037	4321.75	-0.87989	0.126465	10.257	305.616	-34.7401	4611.36	-335.392	-2.95662	4284.89	243.781	-30.3622	4421.79	-0.574288	0.0403367	8.6443	304.036	53.6606	4254.76	329.341	22.7932	4299.63	-363.83	17.5885	4187.45	-0.820551	-0.0484373	10.4846	-538.383
39	413.71	171.951	5332.56	450.054	-10.1157	5454.63	-496.313	-61.6508	5604.51	-0.960988	-0.157909	11.5819	332.088	-108.091	4354.96	-361.643	-63.3203	4502.31	370.83	-111.163	4373.67	-0.834999	0.122308	10.3778	284.717	-30.7456	4663.29	-319.077	-9.22667	4331.6	226.685	-23.3262	4470.3	-0.539036	0.0291075	8.73981	285.96	53.863	4286.9	311.007	19.9241	4331.21	-350.662	19.5336	4209.07	-0.779755	-0.0446425	10.5548	-513.25
40	391.06	172.266	5392.06	427.985	-9.65356	5500.67	-463.42	-61.3946	5662.32	-0.90615	-0.158276	11.6973	313.751	-96.0591	4403.54	-339.117	-65.2193	4538.82	350.827	-116.384	4417.74	-0.787259	0.115476	10.4791	262.43	-27.0501	4708.59	-300.235	-14.1754	4376.25	208.705	-16.8073	4511.78	-0.500671	0.0192656	8.82512	268.209	54.3736	4313.65	291.798	17.0123	4357.67	-335.733	20.2476	4225.36	-0.737059	-0.0420791	10.612	-485.055
41	367.278	171.398	5447.68	404.026	-9.7408	5537.41	-429.059	-58.012	5716.02	-0.848139	-0.155211	11.8005	292.969	-83.0078	4443.36	-315.785	-69.1102	4566.76	329.646	-121.861	4454.84	-0.736044	0.106484	10.5614	239.258	-24.4141	4746.09	-279.236	-17.9557	4416.75	188.359	-9.58431	4545.62	-0.458795	0.0104128	8.89772	249.589	54.9276	4333.81	269.56	14.5552	4374.81	-315.45	19.6936	4236.87	-0.686749	-0.040969	10.6522	-455.424
42	341.752	170.776	5495.07	377.97	-11.2251	5565.85	-397.646	-51.8818	5763.58	-0.789497	-0.149391	11.8877	269.056	-69.4309	4474.28	-292.224	-72.7836	4587	306.929	-126.355	4486.9	-0.680989	0.0964786	10.6267	215.418	-23.38	4774.84	-256.347	-21.1705	4449.84	164.019	-0.284074	4571.31	-0.412666	0.00161853	8.95452	228.879	55.2478	4346.19	244.243	12.6231	4382.35	-289.681	18.1161	4244.85	-0.627671	-0.0409406	10.6751	-425.273
43	314.363	170.932	5532.18	349.666	-14.9756	5587.11	-371.265	-43.93	5803.24	-0.731506	-0.141233	11.9569	242.916	-55.6663	4497.3	-268.819	-74.3438	4600.42	282.37	-128.768	4515.55	-0.622865	0.0863507	10.6777	189.989	-23.6166	4794.7	-231.891	-23.6263	4475.09	135.69	10.8868	4588.75	-0.3619	-0.00707251	8.99513	205.795	55.227	4350.57	217.399	10.9628	4382.99	-260.915	15.9728	4251.15	-0.562917	-0.041321	10.6844	-395.373
44	285.673	171.16	5560.23	319.154	-21.2366	5602.16	-347.598	-36.119	5833.77	-0.672954	-0.131452	12.009	215.852	-42.0126	4513.7	-244.633	-74.1064	4607.71	256.001	-128.976	4540.07	-0.561984	0.0759906	10.7155	161.769	-24.5745	4805.72	-206.237	-24.3819	4494.74	105.188	21.9655	4598.39	-0.307134	-0.014132	9.02129	181.352	54.994	4348.1	190.554	9.33009	4379.39	-231.628	13.7142	4257.4	-0.496618	-0.0416443	10.6846	-365.35
45	256.296	170.666	5580.63	287.107	-28.1924	5611.4	-323.83	-30.5267	5854	-0.61276	-0.122237	12.0442	188.755	-28.578	4524.52	-218.175	-73.3141	4609.5	228.002	-127.267	4558.8	-0.498016	0.0647339	10.7401	130.297	-25.8849	4808.19	-179.767	-22.9715	4510.14	74.3925	31.1075	4600.77	-0.249538	-0.0182999	9.03442	156.658	54.6943	4340.01	164.182	7.75744	4372.47	-203.027	11.5848	4262.01	-0.431064	-0.0418557	10.676	-333.062
46	226.677	169.155	5594.57	254.326	-33.6029	5615.13	-297.246	-29.1212	5862.91	-0.549886	-0.116353	12.063	161.442	-14.9703	4530.18	-188.345	-73.0172	4606.47	198.622	-124.038	4570.28	-0.43015	0.0517609	10.7512	97.0615	-27.6529	4802.92	-152.895	-20.2533	4520.09	44.904	38.2553	4597.18	-0.191384	-0.0200274	9.03514	132.266	54.3619	4327.12	137.892	6.50476	4361.74	-175.272	9.65976	4260.68	-0.366522	-0.0421355	10.6555	-296.359
47	196.942	167.301	5602.68	221.489	-35.6432	5613.55	-266.809	-31.8986	5862.37	-0.484169	-0.115564	12.0672	133.556	-0.720061	4531.01	-156.287	-73.1491	4599.71	168.511	-120.308	4574.21	-0.359516	0.0375542	10.7496	63.8616	-30.0593	4790.83	-126.021	-17.2961	4523.1	18.1816	44.2543	4589.34	-0.135047	-0.0204398	9.02415	107.654	53.8157	4309.46	111.277	5.81797	4346.66	-148.469	8.02168	4249.29	-0.302314	-0.0424689	10.6192	-255.776
48	167.179	165.89	5605.56	188.482	-35.2018	5606.33	-232.94	-37.15	5856.7	-0.415887	-0.118589	12.0601	104.907	14.3684	4527.21	-123.941	-73.2474	4590.44	138.467	-117.314	4570.74	-0.288107	0.0232943	10.7366	31.9751	-33.1626	4772.96	-99.3561	-15.1374	4518.5	-5.24323	49.816	4578.34	-0.0818395	-0.0206344	9.00243	82.1769	52.8497	4286.97	84.1466	5.55592	4326.56	-122.216	6.98485	4227.9	-0.237425	-0.0423115	10.5665	-214.169
49	137.227	165.422	5603.22	154.869	-34.2571	5592.91	-196.109	-43.1097	5850.34	-0.34495	-0.123137	12.0445	75.593	30.0079	4518.71	-92.9043	-72.9974	4579.27	109.026	-116.035	4560.15	-0.217678	0.0102199	10.7129	1.76202	-36.8063	4750.61	-73.0135	-14.7824	4506.05	-27.9939	55.1706	4563.31	-0.0303644	-0.0215144	8.97009	55.5378	51.4181	4259.74	56.503	5.23367	4300.68	-95.6663	7.0693	4200.34	-0.170911	-0.0407989	10.5002	-174.14
50	106.237	165.606	5594.05	120.267	-34.6641	5572.84	-156.893	-48.1136	5846.62	-0.270896	-0.126515	12.0212	45.7569	45.861	4505.44	-63.1536	-72.7937	4563.86	79.4986	-116.205	4543.35	-0.147781	-0.00192175	10.6772	-26.5351	-40.805	4725.05	-46.6928	-16.4956	4486.69	-53.3198	60.4465	4542.94	0.0215244	-0.0234554	8.92771	28.4032	49.9179	4228.36	28.3666	4.38113	4268.3	-68.0094	8.76409	4170.42	-0.102674	-0.0374684	10.4231	-135.708
51	73.2422	166.016	5576.17	85.0459	-36.4741	5547.01	-116.541	-51.1328	5842.04	-0.194185	-0.127659	11.9871	15.9599	61.5705	4487.36	-34.1797	-73.2422	4541.02	48.8281	-117.188	4521.48	-0.0776264	-0.0138245	10.628	-53.4903	-44.7364	4696.5	-19.5312	-19.5312	4462.89	-82.1355	65.7679	4516.67	0.0753532	-0.026328	8.87668	1.60436	48.8216	4193.5	0.035604	3.10368	4229.76	-39.61	11.7418	4138.59	-0.0339425	-0.0330649	10.3365	-97.6562
52	37.7481	166.288	5548.55	50.1348	-38.3971	5517.32	-76.5661	-51.3841	5830.49	-0.116195	-0.12667	11.9384	-12.7297	76.7554	4464.44	-5.57447	-74.7128	4508.85	16.7062	-118.479	4496.25	-0.00749141	-0.0258752	10.565	-80.6617	-47.8925	4663.92	9.00344	-23.2207	4436.57	-111.907	71.2537	4484.97	0.130834	-0.0302348	8.81787	-24.21	48.4609	4155.73	-27.9247	2.05975	4186.4	-11.9608	14.8901	4102.08	0.0330571	-0.0293186	10.2397	-59.0642
53	1.1405	166.319	5513.41	16.4605	-39.1306	5485.66	-38.4799	-48.0866	5805.83	-0.039625	-0.123844	11.8738	-39.3103	91.0639	4436.66	22.6668	-76.6324	4470.72	-14.1849	-120.102	4471.64	0.0597384	-0.0373309	10.494	-109.579	-49.5886	4626.23	37.9611	-27.4965	4406.97	-140.041	76.9894	4448.36	0.186659	-0.035632	8.75043	-49.1211	48.603	4115.1	-54.9511	1.9077	4139.59	13.445	17.0888	4058.1	0.0966989	-0.0275012	10.1316	-20.2269
54	-34.724	166.069	5473.85	-15.7243	-38.1883	5452.36	-3.22723	-41.3031	5764.76	0.0333649	-0.11954	11.7933	-64.4039	104.663	4404.1	50.4479	-78.1924	4431.32	-40.4153	-122.21	4452.21	0.121785	-0.0475677	10.4223	-140.314	-49.8141	4583.31	66.1605	-32.3717	4372.67	-166.675	82.654	4406.45	0.242199	-0.0423267	8.67312	-73.393	48.8741	4071.57	-80.7909	2.74972	4090.16	36.2257	17.8101	4006.79	0.156678	-0.0278236	10.0128	18.2571
55	-68.2744	165.566	5432.5	-47.0724	-36.1815	5415.66	29.7118	-33.2752	5711.23	0.102494	-0.11493	11.7003	-89.9793	118.151	4366.92	77.6671	-78.8082	4393.61	-60.3713	-124.704	4439.14	0.178848	-0.0566748	10.3533	-171.728	-49.1174	4535.81	94.3593	-36.8895	4332.37	-193.793	87.6512	4358.27	0.298494	-0.0489548	8.58485	-97.2341	48.9718	4025.06	-105.515	4.10944	4038.4	57.1562	17.1426	3951.31	0.213863	-0.0295721	9.88634	55.91
56	-99.6068	165.251	5389.46	-78.2999	-33.7975	5373.65	61.09	-26.5924	5650.35	0.168868	-0.11167	11.5972	-117.808	132.053	4325.21	104.204	-78.6488	4354.79	-78.5317	-126.629	4422.36	0.235734	-0.0659438	10.277	-202.676	-48.0127	4484.25	124.718	-39.3918	4284.84	-222.808	91.578	4303.03	0.357118	-0.0538448	8.48468	-120.532	49.0086	3975.24	-129.204	5.49763	3984.57	77.0648	15.1986	3894.89	0.268907	-0.0323442	9.75463	92.5042
57	-129.42	165.711	5343.91	-109.892	-31.402	5325.04	91.6612	-23.7842	5587.17	0.233856	-0.111704	11.4861	-147.318	146.049	4278.65	129.935	-78.0409	4310.84	-100.649	-126.855	4389.42	0.296411	-0.0762673	10.1801	-232.305	-46.5089	4427.85	157.106	-39.4313	4229.85	-252.261	94.9635	4240.86	0.416488	-0.0570438	8.37203	-143.056	49.2478	3921.69	-151.82	6.83254	3928.81	96.7833	11.9585	3838.4	0.322276	-0.0363056	9.61819	127.847
58	-158.436	167.397	5294.83	-141.758	-28.559	5270.07	122.203	-25.5646	5524.78	0.298452	-0.116162	11.3685	-176.609	159.339	4226.66	154.901	-77.387	4259.2	-130.072	-124.458	4333.78	0.362046	-0.0880583	10.0552	-259.929	-44.3284	4365.05	186.734	-39.0228	4169.17	-279.863	98.6062	4172.17	0.471564	-0.0605583	8.2473	-164.581	49.9284	3864.03	-173.185	8.49107	3871.08	117.147	7.25319	3780.08	0.374324	-0.0421021	9.47526	161.839
59	-187.539	169.575	5239.48	-173.72	-24.7101	5209.2	153.522	-30.5489	5463.95	0.363728	-0.123942	11.2434	-204.033	171.213	4168.93	179.614	-77.3034	4201.28	-163.367	-119.102	4265.51	0.429057	-0.101507	9.91097	-285.083	-41.2784	4294.52	209.461	-40.1237	4103.9	-304.421	102.705	4097.97	0.518583	-0.065913	8.111	-184.919	51.0791	3802.41	-193.123	10.8627	3811.35	138.962	0.920958	3718.08	0.425416	-0.0502109	9.32438	194.49
60	-217.706	170.898	5174.24	-205.505	-19.5839	5142.83	186.424	-37.2356	5405.37	0.43075	-0.133223	11.109	-229.59	181.544	4106.98	204.666	-78.443	4139.23	-195.92	-110.557	4197.58	0.494285	-0.117207	9.76042	-308.652	-37.7095	4216.27	228.6	-42.5211	4029.39	-326.923	106.272	4020.46	0.560907	-0.0721005	7.96154	-203.902	52.6204	3737.2	-211.624	13.9314	3749.05	162.088	-6.68837	3652.11	0.475289	-0.0602656	9.16518	225.888
61	-249.763	170.111	5095.86	-236.376	-14.3032	5071.11	221.511	-44.1438	5349.27	0.500003	-0.14128	10.9633	-253.906	190.43	4042.97	230.196	-81.1121	4074.62	-224.677	-99.5155	4137.54	0.555938	-0.134931	9.61245	-332.031	-34.1797	4130.86	250.039	-45.1492	3939.53	-348.547	108.227	3941.81	0.604033	-0.0773667	7.79672	-221.38	54.4614	3668.73	-228.887	17.1873	3682.95	185.23	-14.6014	3583.85	0.522918	-0.0709707	8.99828	256.975
62	-282.515	167.243	5006.26	-265.456	-10.4134	4994.06	257.521	-49.9782	5292.17	0.569135	-0.146124	10.8052	-277.406	198.02	3978.2	255.263	-84.7921	4007.73	-250.308	-88.8743	4080.02	0.614137	-0.152117	9.46406	-355.988	-31.2475	4039.05	272.904	-46.2708	3847.19	-369.248	108.435	3861.1	0.647859	-0.0801327	7.62481	-237.469	56.3695	3596.57	-245.114	20.1	3611.83	207.031	-21.8156	3515.02	0.567448	-0.0808738	8.82376	289.245
63	-313.317	163.248	4911.13	-291.984	-9.24089	4911.8	292.21	-53.5419	5228.63	0.634153	-0.146648	10.635	-299.695	204.678	3910.46	278.773	-88.844	3938.62	-274.025	-81.8367	4017.76	0.668662	-0.166038	9.30788	-378.756	-29.4726	3942.5	289.115	-43.4387	3785.41	-387.879	107.604	3774.6	0.685253	-0.0789073	7.46591	-252.475	58.0106	3519.76	-260.241	22.5313	3535.52	226.539	-27.6835	3445.98	0.608295	-0.0890531	8.64095	323.64
64	-339.586	159.088	4816.05	-316.355	-9.92515	4825.06	323.328	-53.6388	5153.18	0.691921	-0.143293	10.4532	-320.176	210.823	3836.62	300.07	-92.7024	3866.59	-296.596	-79.5766	3946.44	0.719135	-0.175656	9.13753	-397.94	-29.414	3843.12	294.788	-36.6362	3764.89	-403.425	106.368	3679.25	0.711477	-0.0737279	7.32619	-266.692	59.0566	3437.34	-273.844	24.8599	3455.24	243.329	-32.0257	3375.24	0.645003	-0.0954028	8.44886	357.96
65	-361.016	155.416	4722.85	-339.629	-10.3487	4734.96	349.386	-49.8202	5062.09	0.741918	-0.137702	10.2593	-338.523	216.64	3755.02	319.393	-95.9494	3789.4	-317.894	-79.164	3867.58	0.765387	-0.18309	8.95113	-412.207	-31.1118	3742.18	299.727	-33.2754	3725.9	-415.969	104.662	3577.08	0.732085	-0.0693369	7.16905	-280.022	59.3773	3349.33	-285.485	27.4914	3372.29	257.023	-34.6984	3301.16	0.676817	-0.100031	8.24723	388.914
66	-379.571	152.575	4629.58	-362.823	-8.45252	4642.52	371.629	-44.3139	4957.87	0.787134	-0.133143	10.0545	-355.13	221.718	3667.78	337.084	-98.1867	3704.61	-337.68	-77.1984	3783.42	0.807809	-0.190369	8.75018	-423.019	-33.2444	3639.36	314.903	-40.9572	3604.29	-426.04	102.138	3472.13	0.75549	-0.0713005	6.95526	-291.974	59.0402	3256.67	-294.988	30.4151	3286.87	267.598	-35.7337	3221.74	0.703173	-0.103012	8.03535	414.437
67	-397.29	150.879	4534.1	-385.679	-3.99704	4546.99	391.917	-39.9461	4844.44	0.830138	-0.132007	9.83934	-370.507	225.549	3577.59	353.269	-99.1314	3611.61	-355.708	-72.2928	3695.63	0.846704	-0.197963	8.53764	-432.278	-34.278	3534.09	337.542	-55.444	3421.7	-434.174	98.6912	3366.63	0.781472	-0.0777954	6.69994	-302.047	58.1213	3160.36	-302.564	33.0244	3197.62	275.54	-35.4149	3134.43	0.724231	-0.10414	7.81081	436.002
68	-415.083	149.982	4433.14	-406.61	1.35904	4445.71	412.092	-39.5132	4725.69	0.871754	-0.134851	9.61254	-384.922	227.923	3485.3	367.703	-98.6995	3512.89	-371.71	-66.5268	3604.9	0.881885	-0.204009	8.31665	-440.731	-33.3987	3425.26	357.158	-65.8778	3247.83	-440.917	94.8654	3257.87	0.804068	-0.0826551	6.44586	-310.042	56.6948	3060.9	-308.448	34.672	3103.05	281.371	-34.0436	3036.67	0.740449	-0.103194	7.57072	455.702
69	-432.287	148.617	4321.81	-423.975	5.8747	4335.96	433.1	-44.0105	4605.01	0.911023	-0.140255	9.37106	-398.234	229.157	3388.49	380.103	-96.832	3411.17	-385.422	-62.2933	3511.83	0.912807	-0.206833	8.08793	-447.095	-31.0618	3310.86	368.702	-67.2403	3116.23	-446.798	91.2929	3142.4	0.819509	-0.0827374	6.21124	-316.175	54.8322	2958.14	-312.639	35.0173	3002.45	285.349	-31.8627	2928.3	0.752218	-0.100151	7.3142	474.978
70	-448.125	145.458	4195.16	-437.035	8.52693	4216.24	454.492	-51.6422	4484.98	0.946556	-0.145289	9.11218	-410.244	229.602	3284.45	390.153	-93.7464	3306.57	-396.742	-60.4198	3415.85	0.938989	-0.206231	7.849	-449.917	-27.85	3188.85	375.685	-63.6844	3003.43	-451.557	87.9844	3018.78	0.828962	-0.0803667	5.9786	-320.692	52.6044	2851.89	-314.779	34.1956	2896.25	287.323	-29.0243	2812.81	0.759319	-0.0953058	7.04436	494.264
71	-461.787	139.964	4051.92	-446.763	9.65679	4087.4	475.703	-60.3726	4368.14	0.97807	-0.148375	8.83738	-420.394	229.032	3172	397.49	-90.0673	3195.26	-405.81	-59.4309	3314.76	0.959818	-0.203673	7.59419	-449.06	-24.2926	3058.7	381.146	-59.4333	2885.04	-454.001	84.2089	2887.99	0.833536	-0.077466	5.73239	-323.604	50.0228	2741.85	-314.481	32.382	2785	287.113	-25.6773	2694.03	0.761297	-0.0889352	6.76454	513.837
72	-472.407	133.125	3897.97	-454.324	9.75788	3950.55	496.085	-68.2076	4256.49	1.00532	-0.14915	8.55302	-427.688	226.52	3051.77	401.758	-86.4409	3073.24	-412.779	-57.6955	3206.25	0.974353	-0.20022	7.31907	-445.966	-20.8542	2921.75	382.538	-55.3918	2754.91	-452.96	79.2086	2751.22	0.831756	-0.0738289	5.47026	-324.472	46.9836	2627.57	-311.811	29.7124	2669.21	284.988	-22.3082	2574.51	0.758067	-0.0814655	6.47688	532.705
73	-479.11	126.105	3740.03	-460.596	9.35172	3806.91	513.934	-73.7139	4145.48	1.0271	-0.147794	8.2615	-431.154	221.161	2924.48	403.009	-83.1259	2940.11	-417.581	-54.6045	3089.81	0.981819	-0.195841	7.02348	-442.058	-17.984	2779.43	376.019	-51.4972	2612.33	-448.017	72.3776	2610.17	0.82178	-0.0687302	5.19379	-322.806	43.3699	2508.55	-307.593	26.2559	2549.34	281.978	-19.9713	2454.66	0.750748	-0.0737248	6.18169	548.779
74	-481.558	119.689	3582.61	-465.424	9.06115	3658.2	526.794	-75.8571	4025.81	1.04132	-0.144569	7.96064	-430.612	213.068	2790.33	401.811	-79.8927	2800.04	-419.861	-50.8369	2967.18	0.982243	-0.189912	6.71221	-436.835	-15.9345	2633.13	362.976	-47.5089	2460.18	-439.162	63.1929	2466.82	0.804177	-0.0615103	4.90703	-318.266	39.1524	2384.33	-302.714	22.0759	2425.83	279.173	-19.7656	2334.68	0.74069	-0.0666457	5.87912	560.096
75	-480.894	113.61	3424.07	-468.416	9.532	3506.21	532.192	-73.6113	3888.13	1.04678	-0.139019	7.64394	-426.544	203.202	2649.11	398.739	-76.4916	2657.4	-419.26	-47.1365	2840.15	0.976171	-0.182409	6.38991	-428.199	-14.795	2484.23	349.126	-43.0406	2304.27	-426.62	51.7435	2322.22	0.781442	-0.0519183	4.61533	-310.931	34.5439	2254.44	-297.225	17.2991	2298.49	276.703	-21.8381	2213.94	0.728105	-0.0606284	5.5681	565.988
76	-478.516	107.422	3261.72	-469.173	11.2373	3351.86	528.449	-66.5173	3725.09	1.04299	-0.13084	7.30498	-419.438	192.46	2500.74	393.684	-72.9711	2513.43	-415.666	-43.7891	2708.34	0.963813	-0.173847	6.05724	-414.258	-14.5964	2333.91	337.566	-38.2596	2148.57	-411.467	40.3727	2174.04	0.755054	-0.0415636	4.32053	-300.951	29.7986	2118.41	-289.65	12.1682	2165.95	272.943	-24.5981	2090.22	0.710566	-0.0547728	5.24531	566.406
77	-474.961	100.697	3091.76	-467.247	13.3987	3189.66	517.865	-56.9475	3539.66	1.03164	-0.120854	6.93927	-409.643	180.875	2346.95	385.8	-69.7013	2366.08	-409.234	-40.5862	2569	0.944901	-0.164708	5.71173	-395.606	-14.8426	2181.38	325.086	-34.6116	1992.69	-394.944	31.9155	2019.2	0.724123	-0.0335467	4.01985	-288.45	25.2263	1976.51	-278.355	6.9386	2026.74	266.087	-26.2774	1961.17	0.685344	-0.0480891	4.90781	561.468
78	-467.335	93.0766	2905.89	-462.166	14.6874	3011.3	503.98	-48.1579	3337.98	1.01285	-0.110169	6.53941	-397.433	167.99	2190.4	374.242	-67.0271	2213.2	-400.122	-37.3046	2419.45	0.919112	-0.155078	5.35174	-374.248	-14.7385	2024.77	307.926	-33.2296	1835.91	-376.524	27.4258	1857.43	0.687166	-0.0298032	3.71143	-273.445	21.3588	1831.97	-262.443	1.95345	1881.36	254.894	-26.0755	1826.16	0.650694	-0.0406386	4.55816	551.953
79	-451.887	84.219	2694.67	-453.352	13.797	2809.1	490.316	-43.3914	3126.2	0.986055	-0.0999141	6.09767	-383.017	153.347	2033.2	358.915	-64.4628	2054.88	-388.251	-33.9224	2260.93	0.886471	-0.144234	4.97992	-351.633	-13.7638	1863.03	284.694	-31.7238	1679.77	-352.861	25.1296	1692.89	0.642049	-0.0279681	3.39831	-255.925	18.7834	1688.72	-242.473	-2.27055	1734.21	239.252	-25.1104	1688.02	0.606974	-0.0342496	4.20554	538.804
80	-425.516	73.7019	2452.75	-438.448	9.83024	2586.32	477.587	-43.7583	2908.9	0.947898	-0.0899394	5.61579	-366.21	136.542	1873.74	340.421	-60.7537	1893.21	-373.32	-30.6044	2098.27	0.847071	-0.130747	4.60045	-325.681	-13.1162	1700.36	255.109	-26.29	1526.91	-320.732	23.1141	1530.44	0.585149	-0.0235533	3.08808	-236.041	17.901	1550.38	-219.176	-5.19812	1590.13	219.187	-24.7214	1549.98	0.554932	-0.0307945	3.85956	522.793
81	-388.934	60.6282	2198.47	-413.659	2.22058	2355.02	460.614	-45.8961	2687.41	0.892542	-0.0768358	5.11619	-346.68	117.188	1708.98	319.349	-54.7036	1730.3	-355.069	-27.5009	1936.16	0.800909	-0.113254	4.21629	-292.969	-14.6484	1542.97	221.434	-17.1748	1384.39	-282.025	21.0148	1378.78	0.516935	-0.0152798	2.79498	-214.876	18.023	1418.52	-193.785	-6.64369	1452.85	195.409	-25.3533	1415.38	0.497059	-0.0302253	3.52734	504.337
82	-344.231	43.929	1958.78	-375.25	-9.54537	2127.49	433.477	-45.8796	2462.64	0.814643	-0.0567115	4.62726	-323.907	95.5045	1537.56	295.703	-46.4877	1567.35	-333.964	-24.4298	1774.95	0.747946	-0.0922113	3.82757	-252.168	-19.4304	1396.8	188.994	-9.51373	1264.52	-242.345	19.5929	1249.4	0.443642	-0.00628051	2.53832	-193.852	18.0664	1293.98	-168.609	-7.17595	1323.7	170.113	-25.5212	1287.75	0.438228	-0.0299613	3.21358	483.706
83	-294.04	23.2053	1758.17	-324.695	-23.7258	1915.03	390.672	-39.9761	2235.73	0.713216	-0.0278781	4.17506	-296.626	74.1533	1364.72	269.02	-37.3704	1404.83	-311.053	-20.9449	1611.54	0.687649	-0.0710464	3.43635	-210.355	-25.3977	1266.82	162.664	-7.19969	1174.01	-207.044	19.3885	1150.39	0.3765	-0.000772711	2.33094	-174.354	17.0711	1177.76	-146.096	-7.46033	1203.68	145.686	-23.4928	1170.67	0.383559	-0.0272393	2.92285	458.109
84	-245.701	3.88768	1599.63	-271.093	-35.2782	1727.41	335.525	-28.5244	2012.77	0.602222	0.00202511	3.77295	-263.389	56.4	1197.4	238.853	-28.6197	1243.61	-287.12	-16.7394	1443.32	0.619144	-0.0535564	3.04671	-176.698	-29.7038	1157.75	145.118	-8.80532	1098.96	-179.77	19.6814	1072.21	0.325563	0.000789956	2.16069	-157.443	15.1485	1072.13	-128.442	-7.78965	1094.23	124.639	-18.5339	1066.38	0.3378	-0.0213058	2.66005	421.212
85	-208.976	-5.59106	1475.12	-224.145	-38.9016	1574.31	279.769	-15.7426	1804.52	0.503707	0.0203139	3.42965	-224.312	44.3632	1042.79	205.089	-21.1755	1089.86	-259.476	-13.338	1275.22	0.540328	-0.0409442	2.673	-157.018	-30.3894	1070.66	138.062	-11.798	1022.39	-163.606	19.3534	999.682	0.297718	-0.000494591	2.00739	-144.013	12.962	979.996	-117.263	-7.58169	997.749	109.778	-12.2529	974.074	0.305321	-0.0145094	2.4289	367.473
86	-192.862	2.40872	1376.29	-191.222	-31.7403	1458.4	235.473	-6.00305	1621.92	0.437759	0.0164832	3.1489	-183.611	37.1478	908.769	167.848	-15.7543	953.388	-223.075	-13.5108	1117.27	0.450642	-0.030897	2.33695	-148.356	-27.8238	997.085	137.467	-14.1976	942.758	-158.467	17.8293	923.487	0.288374	-0.00272806	1.85849	-134.89	11.14	903.901	-114.082	-6.13019	916.808	103.942	-6.59306	892.462	0.290396	-0.00954742	2.23253	302.816
87	-195.678	24.4242	1291.75	-173.328	-17.6172	1363.33	212.918	-3.10088	1473.83	0.411169	-0.00700063	2.91735	-146.164	33.3702	803.245	127.85	-12.9862	842.878	-174.118	-19.4618	978.972	0.351497	-0.0210951	2.05902	-146.331	-22.7596	927.071	135.652	-14.3962	868.448	-157.512	15.6914	846.708	0.285262	-0.00475634	1.71498	-129.994	9.77807	841.007	-118.875	-3.34381	851.355	107.581	-2.90339	820.006	0.293305	-0.00768348	2.0673	240.56
88	-208.053	48.9913	1207.96	-170.391	-1.48426	1269.51	209.786	-6.76122	1354.22	0.415625	-0.0383442	2.70735	-116.302	31.6056	725.889	91.8809	-12.6705	755.294	-121.911	-27.43	863.556	0.258913	-0.0132135	1.83912	-147.054	-16.501	854.947	129.241	-12.2004	802.575	-153.295	13.647	773.839	0.278833	-0.00606639	1.57812	-128.591	8.58718	784.603	-127.646	-0.705153	794.685	115.022	-1.01219	754.481	0.30549	-0.00731859	1.92034	192.966
89	-220.656	64.7851	1111.81	-181.515	12.2736	1161.32	218.343	-14.9594	1250.69	0.438435	-0.0650171	2.48983	-97.3968	30.3573	661.87	70.2461	-14.124	680.774	-83.367	-30.1909	770.608	0.196882	-0.0112088	1.65755	-147.494	-11.3241	782.603	122.538	-9.89793	738.676	-144.076	11.8916	705.37	0.268784	-0.00679273	1.44524	-129.904	7.27427	728.041	-135.772	0.05588	739.046	119.633	-0.508054	693.554	0.317051	-0.00644966	1.77788	165.668
90	-228.987	67.7585	1000.87	-201.375	22.3092	1044.49	230.835	-25.6643	1150.81	0.467181	-0.0817725	2.25831	-92.543	28.1555	595.22	71.4026	-16.6036	610.288	-72.9674	-21.69	698.912	0.185825	-0.0180944	1.49375	-144.775	-9.53735	712.622	119.527	-9.4649	671.232	-133.624	10.1267	637.932	0.25828	-0.00652591	1.31227	-132.546	5.64605	668.011	-139.967	-2.00738	678.73	117.422	-1.11684	634.938	0.320858	-0.00391306	1.63062	161.99
91	-233.383	61.1413	883.398	-223.171	28.2884	931.792	241.126	-36.9799	1045.67	0.492959	-0.0893171	2.02139	-98.8893	24.6675	521.154	88.1258	-18.9212	542.353	-84.261	-5.92447	640.996	0.212778	-0.0295424	1.33695	-138.314	-11.245	645.073	118.284	-9.86857	604.962	-125.372	8.11036	568.62	0.247924	-0.00437075	1.18043	-134.516	3.60897	604.547	-140.661	-5.65392	613.744	111.789	-2.94781	576.481	0.318415	-0.000742916	1.47683	180.585
92	-234.315	48.4768	767.958	-240.015	29.9496	834.106	247.731	-47.4	936.479	0.510185	-0.088905	1.79365	-106.42	20.9312	448.369	105.438	-19.6685	479.221	-100.446	8.13863	586.29	0.244959	-0.0382285	1.18743	-130.29	-13.8955	576.993	115.063	-9.1562	547.5	-118.74	6.14729	498.987	0.236321	-0.000913905	1.05375	-133.808	1.07698	537.817	-138.93	-9.26394	545.083	107.41	-6.17639	516.053	0.312804	0.0016544	1.3157	206.667
93	-228.85	33.1768	654.947	-244.026	27.8319	740.587	249.996	-55.4876	826.274	0.510758	-0.0823127	1.56986	-105.198	18.0166	385.784	110.266	-17.7274	422.391	-106.738	12.8666	525.532	0.252723	-0.0381282	1.04611	-122.89	-14.931	505.489	108.905	-6.99341	496.54	-111.408	4.7801	432.527	0.222762	0.00204944	0.931123	-129.488	-1.89332	467.566	-135.142	-11.677	473.111	107.073	-10.5499	451.908	0.305855	0.00248539	1.14589	223.187
94	-209.334	18.4707	533.448	-226.704	22.9772	626.786	247.242	-59.8254	718.003	0.482785	-0.0715566	1.3271	-93.7922	16.1686	332.591	102.98	-13.9788	368.032	-102.689	10.0193	458.561	0.234886	-0.0315052	0.909218	-115.689	-14.3502	431.864	101.463	-4.56637	440.444	-101.77	4.34532	371.593	0.207002	0.00352998	0.807375	-122.104	-5.04735	392.956	-127.504	-13.1346	396.265	107.802	-14.5092	383.472	0.294094	0.00302215	0.964949	221.417
95	-167.843	7.56104	391.835	-180.027	16.4396	469.178	237.851	-59.7171	612.044	0.413852	-0.0591523	1.04082	-77.8252	14.9469	279.908	89.5879	-10.1427	310.072	-93.8661	5.29658	389.036	0.204937	-0.0238338	0.767901	-106.093	-14.2726	360.9	93.8189	-2.61955	372.53	-90.3185	4.57924	315.212	0.188379	0.00459138	0.68064	-112.309	-8.11448	313.129	-113.812	-14.1444	312.616	105.53	-16.2469	310.393	0.272898	0.00494697	0.7703	205.526
96	-105.555	2.00323	233.026	-110.278	9.41856	277.34	219.008	-55.3852	505.48	0.307245	-0.0472038	0.717765	-62.6824	13.8865	219.736	75.3105	-7.64438	244.07	-84.8526	3.49008	320.004	0.174791	-0.0196254	0.614791	-91.7255	-16.5359	296.802	85.2804	-0.583813	300.076	-77.9039	5.10799	261.796	0.165454	0.00703852	0.557337	-100.171	-10.6474	230.23	-93.1165	-14.9353	223.103	97.1582	-14.7818	234.269	0.238992	0.00888744	0.565793	180.649
97	-41.3401	0.154748	88.197	-39.9671	3.27782	98.4199	187.818	-47.112	395.184	0.190156	-0.0357132	0.411082	-49.311	12.4797	155.142	60.7651	-6.2111	174.928	-74.5106	4.13056	250.938	0.144783	-0.0179002	0.45572	-73.0006	-19.5786	237.063	74.7793	2.12652	231.585	-64.5264	5.48759	209.095	0.137801	0.0105263	0.439901	-84.615	-11.8554	152.232	-68.6556	-14.8055	138.242	82.843	-11.8902	163.204	0.194286	0.0121541	0.373309	149.298
98	3.91521	0.006247	-8.25115	7.59417	-0.615152	-18.5824	142.202	-35.3151	279.03	0.0923431	-0.0245223	0.178194	-36.1385	10.1947	95.4652	44.938	-4.96866	110.857	-59.6742	4.88481	180.047	0.110399	-0.015725	0.303053	-51.9154	-19.9101	175.361	60.5066	4.4541	166.953	-49.0985	5.18433	154.017	0.104838	0.012449	0.322153	-64.4409	-10.9094	87.775	-44.538	-12.8593	70.5422	63.4155	-9.92248	106.656	0.141855	0.0113933	0.218033	111.718
99	17.8227	0.028435	-37.5606	20.9098	-1.69376	-51.165	88.3412	-21.7927	165.085	0.0350519	-0.0142214	0.0539529	-22.0554	6.69549	49.0396	27.4815	-3.25059	59.0498	-38.6001	3.9261	107.552	0.0691312	-0.0108808	0.169141	-30.6299	-14.8407	107.633	40.3934	4.56243	101.975	-30.832	3.75035	94.4133	0.0661109	0.0101597	0.197331	-40.1104	-7.59092	42.6155	-24.2705	-8.70533	28.7599	40.4934	-10.3847	70.8335	0.0862957	0.00486427	0.117016	68.8868
100	11.4785	0.018313	-24.1904	13.0155	-1.0543	-31.848	37.2496	-9.14942	67.3747	0.00901272	-0.0057327	0.00800984	-8.98342	2.85335	17.516	11.2379	-1.38584	21.8133	-16.3468	1.85603	43.2991	0.0286825	-0.00478085	0.0648106	-12.1947	-6.76159	44.0029	17.1468	2.3326	40.9815	-12.7267	1.67576	38.3781	0.0273051	0.00481506	0.0800705	-16.6817	-3.36857	14.5473	-9.15709	-3.79491	7.94018	18.5625	-11.6981	50.0648	0.0365355	-0.00373132	0.0596995	28.1738
101	0	0	0	0	0	0	-0.000188	4.6e-05	-0.000336	-1.32835e-07	3.25022e-08	-2.37407e-07	0	0	0	0	0	0	0	0	0	0	0	0	0	0	0	0	0	0	0	0	0	0	0	0	0	0	0	0	0	0	2.76422	-11.5796	35.9684	0.00227453	-0.00952826	0.0295965	0
[truncated: 74 more columns]

## Sheet: LHGRF
	LHGRF_Z	LHGRF_Z	LHGRF_Z	LHGRF_Z	LHGRF_Z	LHGRF_Z	LHGRF_Z	LHGRF_Z	LHGRF_Z				LHGRF_Z	LHGRF_Z	LHGRF_Z	LHGRF_Z	LHGRF_Z	LHGRF_Z	LHGRF_Z	LHGRF_Z	LHGRF_Z				LHGRF_Z	LHGRF_Z	LHGRF_Z	LHGRF_Z	LHGRF_Z	LHGRF_Z	LHGRF_Z	LHGRF_Z	LHGRF_Z				LHGRF_Z	LHGRF_Z	LHGRF_Z	LHGRF_Z	LHGRF_Z	LHGRF_Z	LHGRF_Z	LHGRF_Z	LHGRF_Z				LHGRF_Z
	LINK_MODEL_BASED	LINK_MODEL_BASED	LINK_MODEL_BASED	LINK_MODEL_BASED	LINK_MODEL_BASED	LINK_MODEL_BASED	LINK_MODEL_BASED	LINK_MODEL_BASED	LINK_MODEL_BASED				LINK_MODEL_BASED	LINK_MODEL_BASED	LINK_MODEL_BASED	LINK_MODEL_BASED	LINK_MODEL_BASED	LINK_MODEL_BASED	LINK_MODEL_BASED	LINK_MODEL_BASED	LINK_MODEL_BASED				LINK_MODEL_BASED	LINK_MODEL_BASED	LINK_MODEL_BASED	LINK_MODEL_BASED	LINK_MODEL_BASED	LINK_MODEL_BASED	LINK_MODEL_BASED	LINK_MODEL_BASED	LINK_MODEL_BASED				LINK_MODEL_BASED	LINK_MODEL_BASED	LINK_MODEL_BASED	LINK_MODEL_BASED	LINK_MODEL_BASED	LINK_MODEL_BASED	LINK_MODEL_BASED	LINK_MODEL_BASED	LINK_MODEL_BASED				LINK_MODEL_BASED
	PROCESSED	PROCESSED	PROCESSED	PROCESSED	PROCESSED	PROCESSED	PROCESSED	PROCESSED	PROCESSED				PROCESSED	PROCESSED	PROCESSED	PROCESSED	PROCESSED	PROCESSED	PROCESSED	PROCESSED	PROCESSED				PROCESSED	PROCESSED	PROCESSED	PROCESSED	PROCESSED	PROCESSED	PROCESSED	PROCESSED	PROCESSED				PROCESSED	PROCESSED	PROCESSED	PROCESSED	PROCESSED	PROCESSED	PROCESSED	PROCESSED	PROCESSED				PROCESSED
ITEM	X	Y	Z	X	Y	Z	X	Y	Z	Horse 2			X	Y	Z	X	Y	Z	X	Y	Z	Horse 10			X	Y	Z	X	Y	Z	X	Y	Z	Horse 7			X	Y	Z	X	Y	Z	X	Y	Z	Horse 5			X
1	0	0	0	913.086	307.617	1123.05	0	0	0	-0.645158	-0.217353	0.79351	39.0625	24.4141	29.2969	-156.25	34.1797	634.766	268.555	-19.5312	498.047	-0.363839	0.0229793	0.911513	29.2969	9.76562	322.266	-68.3594	-29.2969	166.016	0	0	0	-0.0633855	-0.0253542	0.316927	498.078	215.983	980.571	259.817	184.144	838.717	-136.446	-162.058	507.63	-0.735907	-0.462594	1.9147	-53.7109
2	227.299	51.4879	261.43	850.994	290.373	1120.86	-314.143	-51.3452	310.738	-0.983852	-0.277827	1.19624	94.2715	-3.99683	178.494	-238.972	38.6536	700.688	294.858	-20.0865	600.281	-0.492658	0.0492084	1.16043	121.079	10.6195	351.794	-164.559	-26.254	304.479	196.449	35.4262	223.848	-0.312906	-0.0469274	0.571258	405.12	187.605	962.145	237.485	150.799	832.625	-133.179	-101.44	545.312	-0.638353	-0.361925	1.92553	-42.7402
3	491.16	117.083	603.988	601.043	215.999	945.744	-706.1	-120.579	702.539	-1.27062	-0.320542	1.59138	164.356	-41.0196	370.605	-310.917	38.3988	694.846	284.699	-17.797	669.257	-0.596092	0.0762519	1.36064	223.209	9.4963	354.914	-269.981	-19.074	468.906	424.414	73.6537	512.143	-0.595586	-0.0663503	0.867129	227.878	122.3	829.331	176.092	82.3119	729.16	-114.517	-3.41586	544.301	-0.426637	-0.171175	1.73028	-25.8795
4	649.099	171.118	908.136	283.536	129.086	752.776	-1027.02	-189.191	1032.78	-1.38463	-0.345791	1.90328	234.635	-66.345	545.32	-343.038	35.1497	681.191	259.485	-15.0752	741.298	-0.656634	0.0914328	1.54347	285.123	6.37262	373.648	-340.239	-14.5874	630.788	564.213	89.838	760.804	-0.772114	-0.0719153	1.14576	50.472	47.8561	691.22	111.277	8.08922	628.447	-98.8718	91.0837	558.349	-0.214451	0.0289135	1.54532	-26.438
5	589.009	191.773	1067.6	10.8575	69.4528	680.903	-1134.89	-239.17	1166.37	-1.22573	-0.353563	2.05956	290.827	-62.6328	650.338	-312.009	30.5629	717.034	238.88	-14.1052	848.175	-0.660209	0.0841626	1.73779	261.766	1.32759	446.695	-337.554	-18.7077	764.85	515.168	63.3787	880.087	-0.723378	-0.0541413	1.35761	-43.07	-7.96208	656.793	78.425	-42.657	629.868	-104.495	141.431	640.763	-0.115076	0.158028	1.58598	-63.8342
6	376.203	179.675	1053.6	-168.228	38.5279	739.393	-1012.09	-261.547	1105.78	-0.862063	-0.338977	2.04818	321.874	-36.3977	697.692	-240.469	25.6719	806.305	228.531	-15.2377	985.094	-0.620331	0.0606368	1.95235	172.071	-4.36856	574.146	-277.241	-29.9813	871.795	329.303	7.77981	895.421	-0.505374	-0.021674	1.5197	-6.23465	-28.2187	787.865	92.5571	-56.242	773.284	-137.039	131.052	809.328	-0.183793	0.177334	1.95054	-147.278
7	140.207	143.582	865.377	-235.601	19.253	875.057	-749.731	-255.264	973.676	-0.462333	-0.295415	1.9177	318.267	-5.64434	730.403	-173.198	21.2099	927.224	227.337	-17.9402	1129.65	-0.5638	0.035135	2.18623	76.2585	-8.67717	731.181	-200.187	-43.4061	964.837	132.188	-47.0288	887.708	-0.265231	0.00798341	1.67701	112.101	-23.5062	1026.33	133.827	-45.5652	996.654	-180.581	84.5503	1021.01	-0.350952	0.126407	2.50475	-283.945
8	-1.62556	92.8026	516.953	-175.966	-4.70214	1035.58	-442.543	-219.526	896.717	-0.187207	-0.217359	1.73057	271.76	12.3001	790	-153.029	17.8798	1058.39	234.106	-21.6584	1260.22	-0.516811	0.0213646	2.43827	34.5859	-9.57572	892.712	-145.951	-54.1244	1056.95	44.1787	-72.3457	934.843	-0.145856	0.0180421	1.87223	248.124	-8.72783	1295.31	178.967	-26.1346	1227.94	-217.079	30.5735	1226.82	-0.530055	0.0538438	3.08574	-447.984
9	-38.6651	41.3956	150.549	-22.6559	-33.9878	1192.34	-170.004	-157.124	957.714	-0.076792	-0.116253	1.62553	197.304	14.0051	886.707	-184.133	15.8625	1188.35	246.772	-25.5353	1371.79	-0.492742	0.0214857	2.70357	68.3241	-6.78137	1042.56	-126.416	-60.3688	1155.1	80.4225	-64.1581	1052.44	-0.178599	0.00686105	2.10953	338.485	1.30969	1518.45	205.871	-12.8001	1398.79	-229.605	-3.55983	1380.43	-0.636853	0.00652567	3.53633	-555.353
10	-15.2361	5.86126	-25.6034	148.131	-55.4354	1337.55	33.3313	-81.3918	1110.47	-0.0703487	-0.0224814	1.7116	130.289	8.28843	1003.16	-236.612	14.8781	1314.45	262.497	-28.4471	1473.97	-0.493676	0.0274815	2.97396	138.313	-2.70763	1178.33	-129.074	-63.0957	1260.99	163.339	-40.2123	1201.21	-0.27957	-0.0130954	2.36294	353.601	-1.17718	1658.42	210.338	-10.2709	1497.72	-218.337	-10.9837	1476.69	-0.643695	0.000382107	3.81211	-519.071
11	25.8833	1.22918	178.496	259.456	-55.5908	1464.28	141.124	-7.5882	1285.2	-0.101898	0.0330486	2.06881	106.443	4.30776	1121.19	-279.638	14.6307	1434.36	278.439	-29.2762	1576.79	-0.521224	0.03106	3.24124	200.195	0	1298.83	-140.664	-63.363	1376.12	212.868	-18.87	1340.34	-0.359406	-0.028879	2.60619	319.954	-12.3115	1742.63	202.219	-15.2965	1557.88	-196.884	-0.887012	1542.82	-0.591675	0.0219872	3.98533	-350.753
12	69.0687	22.2828	697.962	281.418	-33.1951	1573.14	131.018	49.8188	1416.95	-0.15507	0.0429108	2.60586	137.755	6.08454	1231.28	-297.756	14.7779	1547.88	292.928	-27.8896	1685.82	-0.571359	0.0286942	3.50215	220.738	-0.627828	1404.9	-153.122	-62.782	1500.74	194.032	-10.0863	1451.43	-0.368599	-0.0337955	2.82803	269.313	-27.1168	1804.63	191.741	-24.4122	1613.62	-179.213	17.1103	1606.87	-0.526843	0.0564797	4.13492	-180.836
13	118.265	49.2143	1284.21	259.149	-6.44316	1676.78	28.9444	85.9744	1499.71	-0.246217	0.030526	3.1518	198.349	9.44649	1337.79	-300.036	14.904	1658.14	306.174	-25.7251	1799.48	-0.631064	0.0244584	3.76134	211.208	-3.85593	1505.55	-166.675	-63.8456	1633.13	143.765	-10.4062	1551.82	-0.338585	-0.032183	3.04445	232.754	-40.7196	1877.24	187.564	-34.558	1693.87	-176.77	34.5751	1692.51	-0.491314	0.0903921	4.33116	-139.3
14	177.345	62.5667	1692.55	244.479	4.73554	1788.95	-107.044	102.418	1566.63	-0.373681	0.0248117	3.56685	258.967	9.48986	1446.29	-297.74	14.5867	1768.61	318.553	-24.3604	1915.58	-0.68652	0.0231051	4.02414	194.001	-8.27299	1611.81	-182.292	-69.1251	1771.4	105.427	-15.1761	1662.05	-0.312669	-0.0296468	3.27471	222.155	-51.102	1973.59	189.561	-44.9348	1797.25	-186.881	49.7158	1798.64	-0.492555	0.119932	4.58284	-229.661
15	238.613	58.3541	1860.56	269.714	-12.3981	1917.89	-218.441	100.814	1651.5	-0.513512	0.0387611	3.83663	298.446	3.13225	1560.24	-299.271	13.549	1881.76	330.083	-24.8484	2031.71	-0.72773	0.0276607	4.29336	190.046	-12.5293	1733.71	-200.317	-79.8638	1912.71	108.42	-20.7906	1795.29	-0.323744	-0.0302101	3.53203	228.168	-59.4027	2085.03	194.549	-55.53	1911.85	-201.962	63.05	1915.6	-0.514016	0.146453	4.86508	-350.494
16	282.805	48.0624	1908.17	308.594	-49.0148	2055.45	-271.653	84.6277	1773.48	-0.609805	0.0604683	4.05366	319.898	-7.2456	1676.83	-304.461	11.9488	1997.16	339.701	-26.6672	2144.97	-0.756171	0.035972	4.56416	203.256	-15.9909	1869.31	-219.22	-93.3227	2051.45	140.285	-26.7887	1942.58	-0.36527	-0.0328058	3.8057	240.346	-66.9243	2201.81	199.348	-66.3313	2025.76	-214.437	75.0968	2033.72	-0.538251	0.171443	5.15209	-406.957
17	290.559	43.6696	1961.79	323.925	-92.2583	2190.39	-287.601	61.2617	1919.74	-0.637386	0.0776169	4.29022	330.965	-18.2429	1792.08	-311.54	10.025	2113.81	346.145	-29.0005	2252.35	-0.775458	0.0449191	4.83028	226.568	-18.486	2009.01	-237.119	-106.019	2181.45	180.748	-33.2964	2090.85	-0.418281	-0.0352033	4.07699	248.74	-74.8874	2314.57	201.908	-77.2184	2130.92	-219.797	86.2549	2146.07	-0.551675	0.196135	5.42385	-400.064
18	261.015	48.9918	2082.57	287.133	-130.408	2313.08	-294.423	38.6411	2073.17	-0.595334	0.0848284	4.57067	338.496	-26.9262	1902.6	-318.858	8.02799	2230.52	348.421	-31.1157	2351.6	-0.788891	0.0518227	5.08636	252.763	-19.8542	2143.14	-252.293	-114.952	2297.84	212.172	-40.3061	2228.7	-0.46553	-0.0355633	4.32907	250.395	-83.3639	2419.82	202.808	-87.8198	2228.28	-220.666	96.6419	2252.11	-0.554493	0.22038	5.67783	-385.24
19	218.978	56.5196	2241.17	220.601	-158.453	2423.32	-316.727	24.0266	2218.18	-0.534383	0.0889994	4.86308	344.649	-33.1253	2008.71	-325.462	6.27238	2344.76	347.129	-32.7726	2444.85	-0.797883	0.0566075	5.33234	276.533	-20.1763	2266.61	-263.968	-119.962	2403.41	232.528	-47.0211	2354.59	-0.501748	-0.0342479	4.55944	247.53	-91.5767	2518.42	202.998	-97.7284	2320.06	-220.684	106.336	2352.2	-0.552306	0.243268	5.91684	-409.06
20	191.042	57.9515	2401.69	165.377	-173.843	2524.35	-349.297	19.0627	2351.5	-0.498637	0.0953545	5.14208	349.859	-37.6816	2112.1	-330.658	5.09671	2453.53	343.452	-33.9114	2535.88	-0.80316	0.0601523	5.57014	295.519	-19.9065	2381.44	-271.714	-121.934	2503.69	245.499	-52.3551	2470.59	-0.527518	-0.0322407	4.77436	242.482	-98.7287	2611.31	203.394	-106.545	2408.44	-223.367	115.412	2446.71	-0.550686	0.263876	6.14377	-459.667
21	191.26	50.065	2541.03	159.229	-174.433	2619.35	-371.914	22.5698	2476.13	-0.510427	0.103822	5.39572	354.472	-41.4017	2214.3	-333.788	4.7921	2554.13	338.521	-34.4833	2628.14	-0.805367	0.06328	5.80157	307.617	-19.5312	2490.23	-275.205	-121.749	2603.93	254.585	-55.3422	2578.74	-0.543534	-0.0304255	4.98023	237.372	-104.123	2699.42	204.022	-114.075	2494.46	-229.218	123.907	2536.41	-0.551812	0.2815	6.36086	-502.93
22	209.332	39.5031	2661.05	198.297	-163.154	2710.64	-364.462	33.3198	2595.07	-0.545535	0.110911	5.62906	357.733	-44.6337	2315.4	-334.695	5.05337	2648	332.812	-34.5753	2721.06	-0.804158	0.0660921	6.02739	311.445	-19.4227	2595.06	-275.397	-120.25	2704.99	260.867	-56.5296	2680.64	-0.550219	-0.0287524	5.18001	232.52	-107.882	2783.41	203.971	-120.336	2577.99	-235.57	131.809	2622.42	-0.553005	0.296248	6.56948	-513.553
23	232.162	34.0371	2766.44	250.287	-146.403	2799.94	-322.017	48.1342	2710	-0.56841	0.113405	5.84783	358.13	-47.4119	2414.47	-333.557	5.16797	2739.37	326.353	-34.3669	2811.39	-0.798511	0.0681977	6.24762	308.496	-19.4958	2695.75	-274.121	-118.254	2804.8	263.772	-57.4989	2777.55	-0.549364	-0.0267798	5.37304	227.369	-110.53	2863.84	202.288	-125.358	2658.83	-239.612	139.107	2705.9	-0.550707	0.308564	6.77087	-501.758
24	249.696	38.0834	2861.23	282.931	-130.592	2888.91	-264.699	60.6194	2820.36	-0.563365	0.108195	6.05565	354.185	-49.7635	2510.6	-330.557	4.43412	2832.43	319.158	-34.0398	2895.86	-0.78742	0.06921	6.46226	300.986	-19.5512	2791.55	-273.184	-116.556	2901.23	262.711	-59.8201	2870.72	-0.543192	-0.0241355	5.55828	221.357	-112.591	2941.23	198.142	-129.179	2736.79	-238.885	145.774	2787.88	-0.541751	0.318889	6.96616	-486.629
25	260.273	46.7883	2947.59	284.149	-120.221	2977.14	-214.969	64.0815	2925.42	-0.536561	0.097163	6.25324	345.999	-51.6675	2603.41	-325.779	2.79887	2927.97	311.067	-33.7866	2973.73	-0.770905	0.0692221	6.67108	291.076	-19.4147	2881.85	-272.86	-115.327	2992.87	257.552	-63.9703	2960.79	-0.533201	-0.0207323	5.73484	214.037	-114.483	3016.09	191.67	-131.903	2811.69	-233.782	151.65	2868.23	-0.526203	0.327523	7.1555	-480.488
26	263.672	53.7109	3027.34	266.777	-117.433	3061.66	-191.875	53.3162	3024.5	-0.510371	0.0826956	6.43931	335.625	-53.0433	2693.21	-319.18	1.01039	3022.58	301.706	-33.8133	3047.39	-0.750251	0.0689194	6.87349	280.321	-19.2051	2967.58	-271.534	-113.958	3079.17	248.726	-69.0776	3047.64	-0.519631	-0.0166647	5.90287	205.542	-116.072	3088.61	183.474	-133.67	2883.33	-226.051	156.517	2946.28	-0.506107	0.33429	7.33835	-477.903
27	259.959	53.9217	3102.59	245.17	-124.214	3139.37	-193.732	32.1712	3117.38	-0.493793	0.0723979	6.61302	325.236	-53.8075	2780.35	-310.714	-0.135483	3112.6	290.69	-34.3264	3119.39	-0.72682	0.0690225	7.06893	269.884	-19.2304	3050.64	-267.478	-111.795	3159.63	236.706	-74.1879	3131.13	-0.502422	-0.0119275	6.06319	196.193	-117.053	3158.92	174.157	-134.619	2951.54	-217.448	160.153	3021.36	-0.483668	0.338869	7.5141	-470.621
28	250.352	48.5369	3176.37	228.4	-139.669	3209.07	-211.061	7.89553	3204.05	-0.4874	0.0699696	6.77564	316.098	-53.9855	2865.44	-300.592	-0.266954	3195.84	277.923	-35.4369	3191.12	-0.701699	0.06993	7.25722	260.903	-19.798	3132.92	-259.89	-108.627	3235.05	222.695	-78.746	3212.91	-0.482574	-0.00654478	6.21864	186.306	-117.12	3227.13	164.183	-134.874	3016.31	-209.237	162.467	3092.97	-0.46057	0.341039	7.68245	-455.009
29	236.358	40.1843	3251.98	213.533	-156.353	3273.95	-234.414	-12.3689	3284.48	-0.483508	0.0733415	6.93173	307.431	-53.8511	2949.69	-289.615	0.024307	3273.51	263.97	-37.0385	3261.23	-0.675347	0.0713093	7.43921	253.611	-21.0063	3215.41	-250.065	-105.251	3309.16	209.558	-83.1021	3298.77	-0.462937	-0.000741891	6.37601	176.114	-116.116	3293.35	153.574	-134.512	3078.17	-201.104	163.786	3161.2	-0.436761	0.340999	7.84399	-435.573
30	219.202	31.6016	3331.94	195.975	-165.92	3337.76	-255.85	-25.5374	3359.04	-0.474127	0.076861	7.08599	298.172	-53.712	3034.36	-278.663	0.01355	3347.28	249.492	-38.995	3328	-0.648139	0.0727264	7.61585	246.829	-22.6296	3297.61	-239.589	-102.602	3386.1	200.39	-87.7314	3395.08	-0.445785	0.00503614	6.54181	165.574	-114.348	3357.69	142.261	-133.605	3137.77	-192.418	164.517	3226.26	-0.411632	0.3394	7.99951	-417.542
31	198.475	26.1663	3414.39	172.301	-162.333	3403.22	-269.319	-33.6084	3428.55	-0.452271	0.0724647	7.23962	287.468	-53.7882	3119.98	-268.225	-0.860763	3418.37	234.97	-41.1101	3390.1	-0.620165	0.0737594	7.78748	239.258	-24.4141	3378.91	-229.639	-101.402	3468.52	196.801	-93.0264	3504.74	-0.432083	0.0104099	6.71925	154.59	-112.219	3420.23	130.178	-132.221	3195.75	-182.554	165.065	3288.33	-0.384535	0.336961	8.14975	-402.534
32	173.173	27.4877	3495.83	144.214	-149.742	3468.38	-268.889	-38.9015	3493.9	-0.414245	0.0588944	7.38938	275.398	-53.9118	3203.75	-257.046	-2.44095	3486.07	220.118	-42.9219	3447.87	-0.59028	0.074038	7.9516	229.828	-26.1339	3458.62	-219.59	-101.443	3552.65	193.855	-99.0149	3615.39	-0.417527	0.0153864	6.89742	143.065	-110.13	3481.06	117.327	-130.519	3252.12	-171.188	165.566	3347.36	-0.355126	0.334253	8.29476	-387.818
33	142.744	38.3969	3572.96	114.833	-135.098	3529.99	-250.537	-43.5136	3555.95	-0.359017	0.0375809	7.53125	262.296	-53.8082	3281.96	-243.394	-4.37129	3549.1	204.437	-43.8955	3502.1	-0.556996	0.0732062	8.10492	218.398	-27.674	3535.77	-208.321	-102.26	3632.93	184.811	-105.624	3710.48	-0.396924	0.0201462	7.06132	130.853	-108.342	3539.87	103.811	-128.774	3305.98	-158.418	165.785	3402.92	-0.323447	0.331526	8.43319	-370.586
34	110.543	54.9462	3644.08	87.1215	-124.805	3585.19	-218.695	-48.553	3615.54	-0.294187	0.0150543	7.66261	248.458	-53.275	3351.35	-225.769	-6.30837	3606.4	187.436	-43.5685	3553.46	-0.518982	0.0710123	8.24458	205.053	-28.947	3609.29	-194.867	-103.42	3704.46	163.885	-112.715	3775.68	-0.365947	0.0248213	7.19779	117.706	-106.832	3595.55	89.7388	-127.27	3356.4	-144.373	165.457	3454.55	-0.289493	0.328777	8.56297	-351.083
35	81.9409	69.6978	3708.33	62.6608	-120.341	3634.43	-180.14	-54.8536	3673.52	-0.229453	-0.00297463	7.78375	233.802	-52.7589	3412.83	-204.75	-8.01904	3658.68	168.676	-42.1269	3601.18	-0.476286	0.0681349	8.37123	189.887	-29.8606	3678.19	-179.644	-104.813	3768.24	133.823	-119.547	3816.63	-0.326711	0.0289453	7.31048	103.364	-105.541	3646.85	75.2114	-126.276	3402.49	-129.179	164.355	3501.82	-0.253236	0.325989	8.68201	-332.085
36	61.8545	75.6587	3764.99	42.3043	-120.593	3679.88	-141.5	-63.1658	3730.66	-0.173575	-0.0128816	7.89628	218.055	-53.0474	3469.48	-182.015	-9.3282	3707.55	147.746	-40.0977	3643.78	-0.429686	0.0657427	8.48742	173.03	-30.2648	3742.12	-163.798	-106.491	3828.39	101.868	-125.068	3849.42	-0.284743	0.0317014	7.4123	87.5725	-104.41	3692.58	60.2381	-125.842	3444.18	-112.938	162.669	3544.52	-0.214557	0.323315	8.78908	-316.064
37	48.8323	72.2682	3815.56	26.7909	-124.415	3723.66	-106.208	-72.4606	3786.68	-0.128476	-0.0143528	8.00252	200.943	-54.8871	3524.32	-159.194	-10.0694	3754.59	124.276	-38.0026	3679.84	-0.379955	0.064961	8.59562	154.638	-29.9721	3801.18	-148.436	-108.494	3888.86	75.0408	-128.281	3889.73	-0.245422	0.0322965	7.51604	70.3391	-103.4	3732.28	44.7688	-125.883	3481.92	-95.7312	160.863	3582.58	-0.173489	0.321031	8.88412	-301.766
38	36.8327	63.6009	3863.11	14.5425	-130.467	3765.77	-74.6415	-80.0083	3840.25	-0.0890395	-0.00928554	8.10373	182.28	-58.0785	3577.96	-136.781	-10.2504	3799.66	98.7132	-36.1822	3709.5	-0.327685	0.0658944	8.69631	134.868	-28.8007	3855.47	-133.673	-110.528	3949.61	54.816	-129.533	3941.28	-0.20988	0.0310291	7.62417	52.0256	-102.496	3766.52	28.7519	-126.312	3516.17	-77.6415	159.401	3615.93	-0.130355	0.319437	8.96791	-285.815
39	19.9008	53.7742	3910.59	1.76022	-137.222	3804.22	-47.0591	-83.0115	3890	-0.0485554	0.00030848	8.19959	161.962	-61.5152	3628.75	-114.172	-10.0456	3841.04	72.2907	-34.8031	3734.36	-0.273291	0.0676689	8.7881	113.846	-26.9496	3905.3	-118.679	-111.976	4006.78	37.3534	-130.457	3996.39	-0.175169	0.0294871	7.72939	33.0187	-101.686	3795.96	12.15	-127.067	3547.2	-58.7392	158.648	3644.52	-0.0855005	0.318772	9.04119	-265.374
40	-3.60262	45.5361	3957.63	-15.4219	-143.156	3836.91	-23.3852	-79.8948	3934.91	-0.00308111	0.0125243	8.28767	139.893	-64.0635	3674.95	-90.727	-9.63699	3876.95	46.2673	-34.0233	3756.07	-0.217179	0.0693765	8.86953	91.6512	-25.2075	3951.3	-102.591	-112.216	4056.36	18.6185	-132.724	4046.96	-0.138161	0.0296723	7.82426	13.6864	-100.964	3821.19	-5.0139	-128.219	3574.53	-39.0402	158.505	3668.3	-0.0392603	0.319008	9.10401	-241.069
41	-31.0001	40.2647	4000.49	-38.9892	-147.669	3862.81	-2.46477	-73.062	3975.1	0.0477107	0.024265	8.36465	116.24	-65.3778	3715.55	-66.0304	-9.25459	3906.3	21.3718	-33.8448	3775.14	-0.159729	0.0705674	8.93935	68.3594	-24.4141	3994.14	-85.039	-111.083	4096.24	-3.66618	-136.981	4087.88	-0.0971862	0.0326562	7.90451	-5.9673	-100.467	3841.82	-22.6995	-129.871	3597.47	-18.5453	158.745	3687.27	0.00832844	0.320157	9.15547	-214.844
42	-59.4566	39.2346	4035.36	-67.6549	-151.764	3882.63	17.077	-65.725	4010.92	0.101879	0.0330705	8.4286	91.6358	-66.4836	3750.81	-40.0656	-9.21215	3929.29	-2.58996	-33.9983	3790.09	-0.10127	0.0715885	8.99676	44.0884	-25.1361	4033.91	-66.5179	-109.21	4127.55	-28.7226	-142.093	4119.28	-0.053148	0.0376581	7.97103	-26.2675	-100.463	3856.58	-40.8671	-132.129	3615.31	2.74376	159.142	3701.39	0.0574993	0.322337	9.19392	-188.217
43	-87.483	41.7259	4061.06	-99.8041	-156.608	3897.29	36.6075	-60.9092	4042.7	0.158197	0.0381354	8.47957	66.7594	-68.5436	3781.11	-12.8559	-9.83182	3946.23	-25.9043	-34.1872	3799.21	-0.0421288	0.0728663	9.04097	19.1283	-26.8491	4068.43	-47.6076	-107.313	4151.77	-55.4662	-146.745	4141.82	-0.0073148	0.0430213	8.02378	-47.5511	-101.221	3864.17	-59.5259	-135.001	3627.5	24.7019	159.579	3710.78	0.108434	0.325685	9.21792	-160.995
44	-115.459	44.2506	4080.14	-133.611	-163.029	3907.55	57.3917	-59.0609	4070.57	0.216536	0.0421946	8.52	42.1537	-72.3081	3806.8	15.2937	-11.2511	3957.48	-48.8239	-34.2054	3801.48	0.0172276	0.0747201	9.07172	-6.18805	-28.756	4094.97	-28.6555	-105.863	4170.03	-82.9119	-150.079	4156.43	0.0392325	0.0473637	8.06234	-70.0907	-102.973	3863.47	-78.7784	-138.32	3633.74	46.9713	160.147	3715.76	0.161147	0.330324	9.22657	-132.559
45	-143.9	43.1342	4095.4	-166.552	-170.747	3913.72	80.62	-58.7463	4094.51	0.276319	0.048659	8.55204	17.9152	-77.1675	3828.11	43.149	-12.9981	3963.55	-71.4913	-34.1451	3798.06	0.0758674	0.077114	9.09052	-31.5357	-30.0977	4111.1	-9.24132	-104.544	4182.46	-110.402	-152.74	4164.96	0.0861289	0.0508181	8.08642	-93.4772	-105.513	3855.35	-98.7369	-141.897	3633.74	69.1679	160.961	3716.69	0.215078	0.336027	9.22066	-102.573
46	-173.106	36.7755	4108.23	-195.962	-179.253	3916	107.478	-58.4911	4114.49	0.336713	0.059342	8.57684	-5.95131	-82.2318	3845.27	69.2841	-14.4756	3965.01	-94.026	-34.1599	3790.55	0.132762	0.079939	9.09923	-56.6798	-30.5592	4118.29	11.2129	-102.874	4188.97	-137.347	-155.684	4169.44	0.133214	0.0541125	8.09821	-116.891	-108.376	3841.83	-119.493	-145.543	3627.29	90.9142	162.13	3713.92	0.269317	0.342346	9.20195	-71.4528
47	-202.963	27.6	4117.37	-219.786	-187.915	3914.58	138.349	-57.3578	4130.42	0.396454	0.0727462	8.59355	-29.5103	-86.677	3858.33	92.5476	-15.1769	3962.25	-116.546	-34.3571	3780.28	0.187152	0.0830303	9.09926	-81.4442	-30.1118	4120.46	33.1442	-100.453	4189.52	-163.209	-159.698	4171.54	0.180309	0.0579988	8.10134	-139.505	-111.095	3824.99	-140.763	-149.083	3614.94	111.941	163.671	3707.48	0.322729	0.348763	9.17263	-39.7387
48	-233.306	18.4948	4121.23	-239.966	-195.307	3909.52	171.677	-55.7045	4142.09	0.4557	0.0855709	8.60095	-53.2772	-90.1083	3866.44	113.58	-15.1851	3954.88	-139.164	-34.5408	3766.75	0.24003	0.0858593	9.08922	-105.656	-28.7374	4121.56	56.0648	-97.4061	4184.59	-187.802	-164.464	4170.42	0.226864	0.0621777	8.09813	-160.597	-113.263	3806.61	-161.937	-152.347	3597.91	132.076	165.521	3697.17	0.374075	0.354756	9.13501	-8.12082
49	-263.817	11.6229	4118.53	-260.048	-199.684	3900.83	205.618	-54.0805	4149.24	0.51543	0.0946664	8.59796	-77.9486	-92.3032	3868.36	133.74	-14.8208	3942.1	-161.986	-34.3935	3748.7	0.293096	0.087751	9.06656	-129.298	-26.7571	4122.66	79.1162	-94.0703	4174.85	-211.079	-169.222	4164.27	0.272279	0.0661456	8.08853	-180.091	-114.885	3786.78	-182.394	-155.168	3577.46	151.146	167.618	3682.74	0.422641	0.360137	9.08999	22.4459
50	-293.745	7.14583	4108.82	-283.341	-199.486	3888.49	238.433	-52.9547	4151.63	0.57622	0.0984851	8.58406	-104.155	-93.0829	3862.97	154.319	-14.4001	3923.23	-185.096	-33.6188	3724.93	0.347919	0.088085	9.02888	-152.592	-25.0185	4120.48	101.481	-90.7698	4160.89	-233.026	-173.218	4151.35	0.31616	0.0697531	8.06967	-198.168	-116.125	3764.91	-201.59	-157.406	3554.69	169.025	169.876	3664.03	0.468022	0.364857	9.03787	51.0008
51	-322.266	4.88281	4091.8	-309.679	-195.816	3872.38	269.335	-52.0324	4148.89	0.636816	0.0981428	8.55871	-131.58	-92.8839	3850.46	175.572	-14.1646	3898.39	-208.216	-32.2279	3694.87	0.404235	0.0870226	8.97601	-175.781	-24.4141	4111.33	122.942	-87.6478	4142.53	-254.077	-175.829	4130.89	0.358804	0.0730817	8.03853	-215.008	-117.149	3740.41	-219.449	-159.094	3529.8	185.847	172.101	3641.36	0.510416	0.368918	8.97857	77.3125
52	-348.79	4.48231	4067.67	-336.308	-191.759	3852.28	298.07	-50.5969	4140.58	0.694675	0.0965737	8.52159	-159.202	-92.5999	3832.04	196.986	-14.3011	3868.33	-230.801	-30.4605	3658.39	0.460411	0.0853066	8.90937	-198.936	-25.4922	4092.62	143.734	-84.7125	4118.95	-274.996	-176.526	4102.9	0.400907	0.0761393	7.99291	-230.787	-118.027	3712.74	-236.08	-160.331	3502.63	201.851	174.05	3615.18	0.550254	0.372263	8.9119	102.028
53	-373.662	4.91043	4038.72	-360.459	-190.389	3827.98	324.393	-47.9351	4126.3	0.747913	0.0971837	8.47388	-185.991	-93.1111	3808.93	218.033	-14.9913	3833.81	-252.307	-28.5617	3615.4	0.5148	0.0836768	8.83044	-221.432	-27.4234	4066.08	164.094	-81.9653	4089.35	-296.538	-174.8	4067.42	0.442706	0.0780556	7.93345	-245.661	-118.462	3681.57	-251.59	-161.218	3473.03	217.276	175.483	3585.98	0.587947	0.37453	8.83787	125.846
54	-397.462	4.9627	4007.78	-381.149	-192.318	3799.71	348.613	-44.112	4105.93	0.796461	0.101211	8.41765	-211.328	-94.2593	3781.75	238.357	-16.2646	3795.04	-272.558	-26.762	3566.54	0.566499	0.082167	8.74039	-242.472	-29.0341	4034.56	184.119	-79.2607	4053.61	-318.613	-170.809	4025.17	0.483687	0.0782661	7.86237	-259.779	-118.061	3646.62	-266.046	-161.749	3440.87	232.27	176.2	3554.07	0.623798	0.375227	8.75639	149.465
55	-420.645	3.69849	3976.96	-399.803	-194.853	3768.32	372.037	-40.6003	4079.92	0.842572	0.106377	8.35532	-235.139	-94.4909	3750.38	257.834	-17.9455	3751.52	-291.876	-25.272	3513.41	0.615605	0.0798615	8.63998	-261.364	-29.2399	4000.68	203.71	-76.2554	4012.54	-339.997	-165.609	3977.86	0.522545	0.0769754	7.78301	-273.293	-116.434	3607.62	-279.407	-161.646	3406.07	246.748	176.099	3519.36	0.657824	0.37372	8.66711	173.584
56	-442.94	1.71814	3944.45	-418.01	-195.072	3734.69	396.08	-39.0209	4048.81	0.888178	0.109047	8.28661	-257.388	-92.1571	3714.63	276.356	-19.8443	3702.68	-310.614	-24.301	3457.7	0.662281	0.0757801	8.52994	-278.66	-27.9968	3964.68	222.757	-72.5927	3967	-359.385	-160.319	3927.23	0.558718	0.075112	7.69722	-286.234	-113.412	3564.48	-291.614	-160.587	3368.58	260.586	175.1	3481.73	0.689904	0.369541	8.5698	198.797
57	-463.816	0.179742	3907	-436.709	-191.218	3699.07	421.846	-40.7022	4013.17	0.934346	0.106223	8.20979	-278.13	-86.6063	3674.23	293.866	-21.7429	3648.49	-328.811	-23.9498	3400.3	0.706557	0.0696616	8.41072	-295.712	-25.9319	3925.28	241.003	-68.1505	3917.4	-376.058	-155.648	3874.11	0.592451	0.0736233	7.60498	-298.334	-109.397	3517.65	-302.614	-158.259	3328.32	273.666	173.124	3441.02	0.719675	0.362695	8.46464	224.702
58	-482.817	0.121925	3861.76	-455.21	-184.435	3660.13	448.37	-44.9926	3974.03	0.979585	0.0984397	8.12266	-297.635	-79.6691	3628.75	310.437	-23.3529	3590.23	-345.719	-24.0492	3340.13	0.748116	0.0630355	8.28215	-313.865	-23.681	3881.18	257.832	-63.3909	3863.01	-390.747	-151.292	3817.06	0.624691	0.0724243	7.50403	-309.277	-104.876	3467.63	-312.501	-154.656	3285.08	285.97	170.21	3397.13	0.746939	0.353613	8.35179	250.326
59	-500.179	1.53697	3809.42	-472.574	-176.314	3616.31	473.824	-50.4194	3932.6	1.02211	0.087867	8.02544	-316.209	-73.5561	3577.71	326.161	-24.3753	3529.37	-360.471	-24.3889	3275.81	0.786589	0.0577051	8.14393	-333.408	-21.7181	3831.29	272.574	-58.8647	3802.92	-404.405	-146.791	3754.29	0.655809	0.0711664	7.3919	-318.752	-100.336	3414.95	-321.537	-150.121	3238.46	297.601	166.535	3349.98	0.771742	0.343121	8.23128	274.735
60	-516.493	3.87839	3752.49	-488.047	-168.233	3566.28	496.403	-55.5203	3890.03	1.06052	0.0768991	7.91979	-334.074	-70.0284	3521	341.082	-24.6219	3466.93	-372.505	-24.7542	3206.21	0.821743	0.0550313	7.99588	-352.984	-20.2674	3774.79	284.792	-55.0341	3736.49	-417.752	-141.845	3684.51	0.685108	0.0695009	7.26682	-326.739	-95.9943	3359.57	-329.998	-145.017	3188.06	308.666	162.283	3299.5	0.79438	0.33185	8.1027	297.273
61	-532.291	6.58206	3693.34	-501.773	-160.562	3509.83	515.399	-59.4225	3846.04	1.0948	0.0668114	7.80703	-351.039	-68.6668	3460.17	355.01	-24.4427	3401.73	-382.74	-24.9107	3131.3	0.854003	0.0542267	7.83828	-371.094	-19.5312	3710.94	295.189	-51.9286	3664.35	-430.369	-136.939	3608.91	0.711801	0.0678544	7.12948	-333.7	-91.6253	3300.55	-338.116	-139.666	3133.47	319.263	157.623	3245.61	0.815508	0.320018	7.96486	317.383
62	-547.293	8.9048	3632.37	-514.169	-153.361	3447.1	531.608	-62.0609	3798.27	1.12561	0.058218	7.68587	-366.792	-68.3907	3397.26	367.686	-24.3509	3331.94	-392.546	-24.6177	3051.42	0.883993	0.0538523	7.67154	-386.603	-19.5688	3639.55	304.816	-49.4465	3587.5	-441.494	-132.794	3529.4	0.735337	0.0667994	6.98166	-340.147	-86.9617	3236.87	-345.766	-134.021	3074.35	329.394	152.583	3188.16	0.835444	0.307388	7.81655	334.928
63	-560.634	9.9743	3568.51	-525.583	-146.682	3378.38	545.933	-63.4292	3744.25	1.15323	0.0517765	7.55403	-381.043	-68.1537	3334.07	378.868	-24.8288	3255.84	-403.091	-23.6668	2966.97	0.912214	0.0525457	7.49605	-399.82	-19.8663	3562.82	314.606	-47.4836	3506.92	-450.432	-129.995	3447.75	0.756071	0.0664503	6.82656	-346.571	-81.743	3167.53	-352.632	-127.836	3010.41	339.014	147.118	3126.99	0.854295	0.293507	7.65655	351.429
64	-571.473	8.97811	3500.69	-535.683	-140.49	3305.53	559.207	-63.6275	3682.04	1.1774	0.0479648	7.41068	-393.733	-67.2509	3269.65	388.518	-26.0482	3173.26	-413.548	-22.1711	2879.27	0.937937	0.0497079	7.31194	-411.417	-19.7664	3483.54	324.327	-45.9103	3423.19	-457.147	-127.778	3364.2	0.774267	0.0659673	6.66652	-353.049	-75.9069	3092.44	-358.397	-120.865	2941.31	348.075	141.181	3061.92	0.871826	0.278084	7.48437	368.822
65	-579.872	6.54437	3428.34	-543.747	-134.697	3231.3	571.895	-63.2812	3612.4	1.198	0.0458365	7.2579	-404.933	-65.174	3201.51	396.709	-28.003	3084.82	-421.937	-20.4286	2790.12	0.959728	0.0451789	7.11921	-422.014	-18.6862	3404.24	333.077	-44.5822	3336.66	-461.987	-124.598	3278.09	0.789965	0.0640641	6.503	-359.193	-69.6102	3012.5	-362.835	-112.976	2866.85	356.516	134.759	2992.87	0.887478	0.261127	7.3005	388.028
66	-586.796	4.74182	3351.32	-549.078	-129.209	3158.33	584.352	-63.1767	3536.91	1.21546	0.0433059	7.09859	-414.718	-61.4521	3127.21	403.515	-30.6759	2991.21	-426.348	-18.7323	2701.24	0.9762	0.0388325	6.91779	-431.614	-16.9045	3324.43	339.978	-43.354	3247.66	-465.301	-118.97	3188.74	0.802827	0.0600517	6.33543	-364.591	-63.0208	2928.63	-366.042	-104.436	2787.15	364.221	127.959	2920.07	0.900898	0.243083	7.10599	407.308
67	-593.229	5.66651	3269.56	-551.666	-123.694	3085.98	596.894	-64.0673	3457.14	1.23069	0.0381264	6.93333	-423.133	-56.4892	3045.95	408.953	-33.8285	2893.22	-426.849	-17.1932	2611.55	0.98746	0.0312599	6.70685	-439.827	-15.2562	3241.65	344.978	-42.0575	3156.04	-467.381	-111.073	3095.33	0.812753	0.0546979	6.16161	-368.836	-56.3051	2841.71	-368.188	-95.6064	2702.37	371.063	120.916	2843.8	0.911787	0.224496	6.90196	424.501
68	-599.271	9.81333	3182.8	-552.221	-117.577	3010.18	608.921	-65.871	3374.1	1.24385	0.0296002	6.7598	-430.196	-51.6021	2958.68	412.984	-36.9919	2791.78	-425.577	-15.7328	2517.05	0.995163	0.0237999	6.48471	-446.259	-14.5734	3153.45	348.879	-40.5004	3061.17	-468.46	-102.824	2996.85	0.820161	0.0499114	5.97886	-371.59	-49.6042	2751.6	-369.438	-86.8424	2612.72	376.913	113.763	2764.37	0.919896	0.205885	6.68868	438.341
69	-603.798	15.4555	3090.59	-551.483	-110.277	2926.73	618.871	-67.6328	3288.26	1.25356	0.0192109	6.57503	-435.92	-48.1423	2866.38	415.564	-39.6881	2687.82	-424.749	-14.264	2413.66	1.00103	0.0178192	6.24968	-450.71	-14.954	3058.59	352.522	-38.49	2962.38	-468.767	-96.2091	2892.31	0.825612	0.0471697	5.78531	-372.567	-43.0413	2657.4	-369.691	-78.3105	2518.17	381.533	106.623	2681.46	0.924709	0.187589	6.46514	449.129
70	-605.602	20.7092	2992.47	-549.792	-101.619	2833.37	625.137	-68.3562	3200.05	1.25807	0.00886984	6.37742	-440.273	-46.5639	2769.83	416.696	-41.6514	2581.69	-425.043	-12.7435	2299.93	1.00556	0.0138487	6.00149	-453.281	-15.3582	2957.69	356.243	-35.9101	2859.39	-468.327	-91.9094	2781.42	0.829411	0.0463158	5.58101	-371.48	-36.7386	2558.22	-368.432	-69.883	2418.41	384.51	99.5997	2593.84	0.925229	0.169689	6.22935	457.327
71	-604.162	24.4847	2888.76	-546.732	-92.2003	2731.62	626.739	-67.4235	3109.46	1.25602	0.00020645	6.16823	-443.129	-45.6171	2669.27	416.466	-43.0186	2472.58	-424.215	-11.2119	2179.5	1.00697	0.0108323	5.74258	-454.102	-14.6484	2851.56	359.43	-32.7895	2752.71	-466.785	-88.1279	2665.22	0.831012	0.0454262	5.36745	-368.079	-30.7737	2453.19	-365.113	-61.4068	2313.1	385.417	92.7964	2500.21	0.920446	0.152208	5.97923	463.332
72	-600.302	27.2353	2781.23	-541.799	-82.7074	2623.38	624.953	-65.582	3014.98	1.24854	-0.00714326	5.94902	-444.348	-43.8613	2564.94	414.972	-43.9714	2359.57	-419.692	-9.71856	2056.59	1.00321	0.00753647	5.47569	-453.258	-12.0988	2741	361.364	-29.1729	2642.9	-463.741	-82.7901	2544.89	0.829743	0.0426541	5.14632	-362.378	-24.8568	2341.91	-359.205	-52.7265	2201.83	383.856	86.2952	2399.37	0.909609	0.134847	5.71313	467.47
73	-594.993	29.5913	2671.84	-534.494	-73.7846	2510.55	621.566	-63.8868	2914.72	1.23724	-0.0139148	5.72116	-443.758	-40.2873	2456.97	412.069	-44.6132	2242.09	-409.73	-8.28381	1934.22	0.992654	0.00310441	5.20287	-450.677	-8.63084	2626.88	361.348	-25.2597	2530.46	-458.8	-74.5569	2421.38	0.824851	0.0375992	4.9191	-354.529	-18.5189	2224.17	-350.459	-43.6585	2083.19	379.779	79.9016	2291.73	0.8926	0.116909	5.43005	470.033
74	-588.574	32.1118	2561.25	-524.336	-65.9285	2394.94	618.24	-63.3455	2806.85	1.22318	-0.0208641	5.48513	-441.05	-35.4511	2345.3	406.74	-44.7609	2120.85	-395.595	-6.82079	1811.13	0.975262	-0.00195233	4.92365	-446.245	-5.57781	2510.08	358.781	-21.8091	2415.56	-451.58	-64.7581	2294.62	0.815621	0.0314972	4.68643	-344.681	-11.2897	2099.76	-338.827	-33.9987	1955.08	373.397	73.2245	2178.82	0.869673	0.0975182	5.12936	470.896
75	-579.62	35.1593	2446.56	-510.848	-59.6023	2278.38	614.641	-64.2109	2690.54	1.20478	-0.0280987	5.23954	-435.883	-30.2643	2229.83	397.768	-44.1669	1996.88	-379.235	-5.21842	1685.08	0.95134	-0.00681153	4.63698	-439.869	-4.15629	2391.38	353.078	-19.7074	2298.34	-441.704	-55.3296	2164.32	0.801371	0.0258189	4.44873	-332.741	-2.82073	1968.04	-324.264	-23.5428	1815.38	364.922	65.8685	2062.19	0.840891	0.0758929	4.81005	469.59
76	-566.406	39.0625	2324.22	-493.652	-55.0832	2162.01	608.848	-66.1336	2565.7	1.1792	-0.0354083	4.98267	-427.927	-25.5185	2110.47	384.155	-42.6757	1870.97	-362.277	-3.40982	1554	0.921121	-0.0107829	4.34179	-431.711	-4.22517	2270.4	343.821	-19.6022	2178.79	-428.839	-47.9236	2030.24	0.781718	0.0211249	4.20558	-317.394	6.62227	1826.07	-306.491	-12.1646	1662.91	354.362	57.4816	1942.57	0.804949	0.0518592	4.46935	465.604
77	-547.683	43.9312	2191.73	-473.096	-51.3013	2042.26	598.894	-68.7472	2432.25	1.14441	-0.0433672	4.71016	-416.905	-21.1374	1987.37	366.482	-40.8008	1742.42	-344.021	-1.64821	1416.89	0.884294	-0.0141304	4.03685	-422.096	-4.76756	2145.98	331.789	-20.4128	2056.22	-413.002	-42.1422	1892.23	0.757388	0.0171983	3.95569	-296.939	16.5803	1670.19	-284.066	-0.129802	1501.34	340.698	47.9292	1816.49	0.758421	0.0259022	4.10439	458.183
78	-524.101	48.999	2050.62	-449.845	-46.5942	1913.5	583.381	-71.5259	2290.34	1.10036	-0.0522371	4.41921	-402.567	-16.663	1860.74	346.019	-39.3503	1609.85	-322.739	-0.327722	1273.24	0.840306	-0.017538	3.72087	-411.348	-4.76088	2016.96	318.287	-20.2977	1929.57	-394.357	-36.6849	1750.21	0.729546	0.0137265	3.69757	-269.675	26.5946	1496.77	-255.181	12.174	1335.81	322.59	37.1446	1679.16	0.69732	-0.00133627	3.71248	446.423
79	-496.785	53.2802	1903.46	-424.417	-39.4395	1770.43	562.427	-73.5199	2140.57	1.04829	-0.0617262	4.10831	-384.686	-11.6521	1730.83	323.989	-39.0663	1471.86	-296.781	0.189173	1122.82	0.78864	-0.021651	3.39277	-399.518	-3.72007	1882.24	304.568	-17.5419	1797.81	-373.027	-30.3114	1604.09	0.699119	0.0107028	3.42977	-234.617	36.2314	1306.96	-218.044	24.3581	1171.48	298.7	25.064	1525.83	0.618257	-0.0292321	3.29491	429.683
80	-466.639	55.874	1752.19	-394.899	-30.6213	1613.41	536.397	-73.7097	1983.64	0.987737	-0.0699238	3.77961	-363.415	-5.93354	1598.29	300.73	-39.608	1326.45	-265.724	0.062366	969.746	0.729353	-0.0264618	3.05468	-386.236	-1.99321	1740.85	291.051	-12.527	1659.81	-348.436	-22.8201	1453.17	0.665763	0.0079746	3.15046	-193.053	45.1367	1117.23	-173.038	35.9044	1014.56	268.04	12.0769	1357.4	0.521794	-0.0567471	2.87108	408.929
81	-433.275	56.3746	1595.24	-357.409	-22.7917	1447.4	505.586	-71.2184	1820.46	0.915904	-0.0740493	3.43611	-339.214	0.444127	1464.03	275.867	-39.7568	1171.11	-230.146	-0.125206	821.671	0.662963	-0.0314338	2.71139	-371.094	0	1591.8	277.475	-7.33292	1514.37	-319.439	-14.8505	1296.31	0.628302	0.00487944	2.8575	-146.721	52.973	947.064	-125.106	46.0235	873.451	230.355	-0.475943	1186.61	0.41322	-0.0818507	2.47441	385.742
82	-395.838	54.5549	1429.76	-308.112	-18.6074	1277.54	469.534	-66.6938	1654.1	0.829147	-0.0725231	3.08163	-312.551	7.42454	1328.98	248.995	-38.2901	1003.52	-190.678	0.215349	686.328	0.590015	-0.0360257	2.36785	-353.442	1.88585	1435.38	263.542	-4.06172	1360.35	-284.907	-7.0644	1132.47	0.585388	0.0007249	2.54966	-97.3673	59.4025	815.883	-79.7685	53.8914	756.843	185.48	-11.134	1027.68	0.298378	-0.102385	2.13974	360.954
83	-353.491	50.405	1254.52	-248.476	-18.1752	1112.81	427.323	-61.7092	1488.96	0.727264	-0.0663743	2.72473	-283.757	14.8802	1192.13	219.31	-35.0584	830.733	-149.126	1.3516	570.155	0.511554	-0.04023	2.03386	-331.659	3.47467	1276.98	247.982	-3.44532	1200.69	-245.204	-0.020173	967.603	0.53538	-0.00447845	2.23621	-47.9694	64.1324	731.531	-42.39	58.7268	672.888	133.445	-18.5005	894.327	0.184157	-0.116318	1.89152	332.404
84	-305.566	45.7986	1082.53	-187.732	-17.8696	967.754	378.04	-57.8445	1329.43	0.61566	-0.0606048	2.388	-252.965	22.5794	1049.7	185.423	-31.4837	673.542	-109.02	3.08081	477.698	0.429366	-0.0448215	1.72633	-303.882	4.62284	1123.26	228.101	-4.2097	1044.28	-202.883	5.87514	817.83	0.476977	-0.00954627	1.9377	-4.02665	66.9615	678.147	-15.0947	60.646	618.471	78.3199	-22.5242	789.629	0.0801794	-0.123536	1.71667	297.187
85	-251.481	43.5797	934.102	-135.723	-13.7718	857.359	322.31	-55.8677	1179.53	0.50132	-0.0605357	2.09921	-220.292	30.2822	897.683	145.904	-29.1117	553.817	-74.0238	5.16279	413.345	0.345291	-0.0506357	1.46271	-268.57	5.20384	980.706	201.098	-4.92202	900.441	-160.671	10.2268	700.079	0.409132	-0.0132103	1.67539	28.6534	67.6998	636.973	3.08304	60.6203	579.741	28.0282	-24.4365	706.521	-0.0030513	-0.125696	1.58253	253.735
86	-191.199	46.2638	827.917	-99.19	-4.1206	788.339	263.819	-54.9318	1042.43	0.391586	-0.0685901	1.87854	-185.81	37.4227	738.31	101.541	-28.773	482.503	-46.8259	7.29355	376.058	0.262116	-0.057642	1.25252	-227.951	5.29031	853.563	166.332	-4.51831	776.421	-121.442	12.8531	622.598	0.334741	-0.014709	1.46208	44.3918	66.1683	589.504	13.2318	59.6552	542.418	-9.3547	-25.5194	637.53	-0.055113	-0.124532	1.45599	203.997
87	-132.063	51.7958	759.788	-76.4064	6.95311	744.839	206.616	-53.9989	921.242	0.293286	-0.0796641	1.71404	-149.477	42.5471	590.771	59.1921	-29.3454	440.706	-27.4416	8.99514	349.987	0.185196	-0.063445	1.08357	-186.684	5.08338	744.667	129.072	-2.94202	673.655	-88.4724	14.154	569.926	0.262371	-0.0143959	1.29051	43.0067	62.663	528.24	16.5853	58.6539	494.232	-27.1608	-26.8993	575.794	-0.0713845	-0.12196	1.31513	150.521
88	-86.7348	54.8272	709.033	-64.2119	14.3221	707.188	154.685	-52.0931	818.468	0.21595	-0.0856661	1.57896	-111.228	44.0514	477.13	26.7374	-29.3765	404.488	-15.435	9.76012	316.774	0.120321	-0.0652494	0.939972	-149.436	4.78582	656.757	95.5819	-0.306978	592.611	-65.1045	14.628	522.597	0.20129	-0.0128001	1.15012	31.7523	58.1223	460.564	15.402	57.7997	437.06	-28.6514	-28.6031	518.726	-0.0623766	-0.118922	1.16544	98.5328
89	-67.3346	50.1618	654.894	-59.2132	14.0252	657.164	111.553	-48.7067	732.209	0.168235	-0.0797671	1.44442	-71.7739	40.9171	413.471	10.2897	-27.687	354.203	-10.0805	9.20778	262.363	0.0722743	-0.0610326	0.807921	-119.016	4.57012	588.418	71.0908	3.16688	532.318	-53.5798	14.7302	464.585	0.158169	-0.0104717	1.02898	18.4103	53.5301	394.915	12.381	56.9663	378.865	-21.3562	-30.1853	465.578	-0.0429095	-0.11576	1.0198	57.9762
90	-70.824	37.7857	583.233	-56.7642	8.3469	584.301	80.53	-43.5461	658.549	0.14705	-0.0633641	1.29025	-35.9791	35.2628	383.832	6.48362	-24.5607	293.209	-9.10001	7.63596	195.735	0.0404438	-0.0529125	0.684571	-95.3522	4.56193	531.804	55.2689	6.69103	484.129	-50.2406	14.6848	398.303	0.130373	-0.00814951	0.917934	10.4616	49.8383	339.418	10.2219	56.0262	327.628	-12.8192	-31.1988	415.607	-0.0275675	-0.112782	0.89086	38.9543
91	-79.0062	22.8671	486.528	-51.8015	1.65403	480.72	64.8404	-36.3308	593.516	0.138239	-0.0429961	1.10279	-10.0895	30.2528	361.571	8.79372	-20.7689	232.529	-9.69784	5.56876	133.548	0.0224179	-0.0443874	0.570739	-78.1249	4.88282	478.515	45.9337	9.28749	436.837	-49.4622	14.639	332.311	0.112627	-0.00664278	0.809818	9.56557	47.3808	296.159	10.5777	54.8603	288.439	-8.41141	-31.3877	368.406	-0.0234962	-0.109956	0.784178	40.9544
92	-73.3202	10.7369	357.932	-39.8324	-2.0086	340.879	62.8909	-27.4558	530.75	0.124387	-0.0255665	0.868769	0.403172	28.7676	322.18	11.0708	-17.0492	182.481	-9.28228	3.5113	91.1811	0.015648	-0.038691	0.467355	-66.7616	5.65101	421.937	40.9161	10.1018	380.304	-46.0433	14.7211	274.507	0.0997752	-0.00666618	0.698881	12.1165	45.9321	261.755	12.0911	53.3733	258.061	-7.25409	-31.0468	324.531	-0.0258882	-0.10726	0.69477	50.6708
93	-48.5409	3.88058	208.021	-22.7509	-2.2116	185.366	65.8465	-18.331	460.297	0.0968977	-0.0141314	0.603186	-1.53837	30.5048	265.118	11.3951	-13.7562	145.414	-7.5458	1.75545	69.6337	0.0160631	-0.0360935	0.376623	-59.6773	6.97127	362.601	38.2151	9.66183	316.367	-39.5368	14.8504	225.323	0.0892007	-0.00789256	0.586946	14.3188	45.2465	232.629	12.8667	51.474	231.772	-7.35133	-30.569	284.705	-0.0284186	-0.10474	0.616401	54.61
94	-17.949	0.836194	71.5508	-6.45441	-0.792119	51.144	64.275	-10.4501	371.906	0.0626574	-0.00741488	0.34947	-7.65149	33.1669	204.868	10.4978	-11.0046	118.679	-5.61281	0.459325	60.8916	0.0186381	-0.0350067	0.301539	-55.0339	8.94499	302.825	35.9348	9.36239	254.371	-32.4751	14.815	180.518	0.0801233	-0.00934498	0.478826	12.7219	45.0263	205.337	11.053	49.0662	204.91	-6.74037	-30.3319	249.608	-0.0251095	-0.102382	0.542961	48.9224
95	3.87039	-0.145393	-15.1155	3.24992	0.414243	-25.617	50.8356	-5.04576	259.552	0.0308879	-0.00375514	0.154611	-9.7882	34.4618	155.8	9.13854	-8.89859	99.538	-4.59808	-0.227661	56.9038	0.0184519	-0.0338316	0.24491	-51.0336	11.6035	244.849	32.2257	10.5586	203.518	-27.3655	14.4016	135.922	0.0718029	-0.0100258	0.379242	7.53396	44.4193	177.891	6.43073	45.8582	175.157	-4.69025	-30.137	218.12	-0.0153502	-0.099083	0.469984	37.7598
96	9.48042	-0.356137	-37.0251	4.99149	0.636228	-39.3446	29.6192	-1.92296	140.3	0.0107026	-0.0015566	0.0451711	-5.53144	33.159	122.201	7.70705	-7.33851	84.8499	-4.69112	-0.34966	52.5989	0.0140633	-0.0314904	0.203659	-46.3423	14.163	189.987	26.5512	13.0615	165.433	-24.6309	13.4196	91.634	0.0632998	-0.00942517	0.290168	1.16649	42.2394	149.172	0.860771	41.3099	143.172	-2.03936	-29.052	186.837	-0.00334621	-0.0926538	0.394293	25.3414
97	5.3256	-0.200059	-20.7988	2.43368	0.310203	-19.1831	8.60331	-0.401619	39.0658	0.000596365	-0.000361596	-0.000647229	1.03322	29.2321	96.9197	6.17351	-5.99382	71.0169	-5.03163	-0.170482	46.2863	0.00797846	-0.0274961	0.168028	-39.9251	15.3143	138.96	19.8643	14.9301	133.15	-22.3296	11.7031	52.6007	0.0533008	-0.00784546	0.210759	-3.93853	37.2958	118.076	-3.66127	34.8649	109.813	0.27212	-26.0968	152.205	0.0064774	-0.080851	0.31276	14.1688
98	-0.557896	0.020958	2.17882	-0.497729	-0.063442	3.92327	-4.42052	0.191596	-19.914	-0.00237753	0.000165394	-0.00975907	5.48216	22.7236	72.2125	4.4861	-4.52285	54.4325	-4.70583	0.034867	36.468	0.0029098	-0.0213984	0.127939	-30.7759	13.7596	92.4881	13.1973	14.1374	99.2673	-18.4004	9.09008	24.0105	0.0404846	-0.00565485	0.140047	-5.73424	28.7592	84.0537	-5.3362	26.1107	76.0732	1.39095	-20.4563	111.296	0.0102538	-0.061982	0.22334	5.76823
99	-2.53964	0.095403	9.91836	-1.37045	-0.174681	10.8024	-7.28728	0.315848	-32.8285	-0.00238622	0.000279184	-0.00855497	5.44424	14.3154	44.4243	2.70168	-2.80287	34.0703	-3.30668	0.096002	23.2081	0.000442481	-0.0135022	0.0797716	-19.3044	9.43289	52.0511	7.38636	9.97483	61.0149	-12.0622	5.72794	8.20834	0.0251532	-0.00336606	0.0787152	-4.69691	18.1072	50.1039	-4.36698	16.1039	44.3635	1.35027	-12.9946	67.5297	0.00856928	-0.0388431	0.133299	1.32151
100	-1.63562	0.061443	6.38778	-0.853047	-0.108732	6.72401	-4.27134	0.18513	-19.242	-0.00125958	0.00016422	-0.00433139	2.80991	6.01623	18.39	1.10279	-1.16577	14.2606	-1.47938	0.059757	9.8149	-0.000178636	-0.00568016	0.0333082	-8.11476	4.17729	20.3035	2.86101	4.47222	25.2435	-5.1926	2.40761	1.63598	0.0104944	-0.00137127	0.0306249	-2.29517	7.72505	20.6203	-2.12591	6.75861	17.9227	0.700857	-5.55669	28.0383	0.00421458	-0.0164902	0.0547863	-0.047725
101	0	0	0	0	0	0	0	0	0	0	0	0	0	0	0	0	0	0	0	0	0	0	0	0	3.6e-05	-1.9e-05	-8.7e-05	0	0	0	0	0	0	-2.33664e-08	1.23323e-08	-5.64688e-08	0	0	0	1.1e-05	-3.4e-05	-8.9e-05	-4e-06	2.8e-05	-0.000141	-1.23427e-08	5.10166e-08	-1.89255e-07	0
[truncated: 74 more columns]

## Sheet: HORSE 10 LF
	LFGRFZ	LFGRFZ	LFGRFZ	LFGRFZ	LFGRFZ	LFGRFZ	LFGRFZ	LFGRFZ	LFGRFZ	LFGRFZ	LFGRFZ	LFGRFZ	LFGRFZ	LFGRFZ	LFGRFZ	LFGRFZ	LFGRFZ	LFGRFZ	LFGRFZ	LFGRFZ	LFGRFZ	LFGRFZ	LFGRFZ	LFGRFZ
	LINK_MODEL_BASED	LINK_MODEL_BASED	LINK_MODEL_BASED	LINK_MODEL_BASED	LINK_MODEL_BASED	LINK_MODEL_BASED	LINK_MODEL_BASED	LINK_MODEL_BASED	LINK_MODEL_BASED	LINK_MODEL_BASED	LINK_MODEL_BASED	LINK_MODEL_BASED	LINK_MODEL_BASED	LINK_MODEL_BASED	LINK_MODEL_BASED	LINK_MODEL_BASED	LINK_MODEL_BASED	LINK_MODEL_BASED	LINK_MODEL_BASED	LINK_MODEL_BASED	LINK_MODEL_BASED	LINK_MODEL_BASED	LINK_MODEL_BASED	LINK_MODEL_BASED
	PROCESSED	PROCESSED	PROCESSED	PROCESSED	PROCESSED	PROCESSED	PROCESSED	PROCESSED	PROCESSED	PROCESSED	PROCESSED	PROCESSED	PROCESSED	PROCESSED	PROCESSED	PROCESSED	PROCESSED	PROCESSED	PROCESSED	PROCESSED	PROCESSED	PROCESSED	PROCESSED	PROCESSED
ITEM	X	Y	Z	X	Y	Z	X	Y	Z	X	Y	Z	X	Y	Z	X	Y	Z	X	Y	Z	X	Y	Z	X	Y	Z
1	9.76562	-102.539	136.719	-214.844	4.88281	341.797	-595.703	4.88281	683.594	-346.68	-4.88281	517.578	0	0	0	-39.0625	122.07	185.547	-273.438	-4.88281	1005.86	-48.8281	0	185.547	-188.599	2.44141	382.08
2	-123.889	-78.5981	364.041	-234.144	6.37557	578.458	-602.766	3.74689	758.117	-349.974	-5.90678	627.674	-77.5444	-0.316041	97.6672	-148.404	193.075	447.62	-333.517	-6.93558	1081.06	-125.49	-1.56156	247.943	-249.466	13.7349	525.322
3	-280.279	-23.3315	639.722	-223.64	7.91847	819.156	-506.776	1.47936	753.643	-301.794	-5.83069	699.354	-176.64	-0.369307	267.878	-278.119	246.354	745.354	-356.015	-8.70157	1002.12	-220.896	-4.92023	330.889	-293.02	26.5748	657.264
4	-364.115	36.9047	874.16	-214.871	10.1498	995.195	-422.513	-0.258295	788.41	-279.331	-4.45759	799.435	-251.784	0.395448	504.215	-371.097	248.247	963.742	-354.835	-10.0044	930.044	-309.017	-10.782	475.061	-320.945	33.7743	791.283
5	-328.253	82.1074	1012.63	-224.745	13.066	1069.11	-408.092	-0.572916	917.972	-315.825	-2.11857	952.623	-286.038	0.797501	768.883	-392.814	186.587	1044.49	-340.334	-10.2378	955.223	-370.185	-19.1706	691.73	-333.286	31.3073	926.583
6	-226.513	105.596	1073.52	-231.782	14.9802	1085.4	-402.811	-0.182535	1066.43	-352.344	-0.25203	1095.33	-302.799	-2.79495	979.778	-356.104	94.2752	1048.26	-315.439	-7.89458	1019.96	-401.428	-28.3192	915.023	-323.653	21.9261	1035.46
7	-124.501	102.681	1084.65	-208.588	13.9487	1101.63	-333.419	-0.005072	1144.09	-320.538	-0.403306	1155.4	-324.16	-13.5017	1063.17	-280.208	9.33956	1049.74	-282.194	-1.45498	1050.02	-402.49	-36.1786	1067.12	-284.512	9.30319	1089.48
8	-59.6483	78.1395	1080.35	-154.629	9.4281	1157.82	-199.782	-0.867659	1144.58	-218.385	-3.13193	1138.47	-332.669	-28.1016	1051.95	-197.784	-46.8042	1095.58	-244.173	7.53388	1034.94	-374.309	-41.3912	1118.5	-222.673	-3.14939	1102.77
9	-36.8117	47.6976	1102.49	-116.694	3.34273	1263.13	-86.3039	-3.49247	1157.88	-120.549	-7.85777	1140.08	-289.785	-39.9905	1035.91	-156.999	-71.9472	1200.02	-206.726	13.9794	1038	-319.919	-43.8168	1124.76	-166.723	-12.7606	1132.78
10	-58.3729	26.6718	1189.77	-144.948	-2.16661	1422.87	-74.3588	-8.44097	1271.03	-99.8122	-13.8832	1251.91	-184.93	-44.7934	1083.81	-200.941	-65.9215	1372.18	-175.881	13.1427	1121.25	-243.048	-43.4673	1149.29	-147.786	-17.3573	1232.76
11	-119.016	18.5341	1339.44	-241.992	-6.10194	1620.7	-155.387	-14.4745	1474.43	-157.444	-19.8828	1462.77	-89.9252	-44.75	1201.27	-303.551	-39.8502	1582.93	-164.429	6.69205	1285.08	-163.372	-41.2812	1226.39	-174.39	-17.6393	1399.13
12	-208.461	19.1151	1521.96	-353.105	-8.84252	1814.13	-262.807	-19.1932	1696.15	-248.578	-24.1264	1695.04	-88.5661	-43.2588	1381.67	-394.165	-12.1407	1778.45	-189.521	0.42925	1490.09	-119.783	-39.3133	1355.34	-233.123	-15.9163	1591.6
13	-313.732	24.2407	1708.76	-422.742	-10.8456	1961.4	-338.013	-20.7098	1873.97	-331.765	-25.3288	1880.95	-185.906	-42.5427	1597.51	-414.709	1.86925	1914.62	-260.701	-0.831672	1698.33	-149.389	-39.5511	1532.24	-302.12	-14.2125	1770.97
14	-407.248	30.4232	1879.05	-438.878	-12.4998	2059.18	-372.449	-20.1147	2005.8	-389.01	-24.7343	2013.94	-302.659	-43.5655	1799.01	-381.722	4.69883	2004.02	-344.55	1.80971	1883.75	-240.121	-41.7303	1734.82	-359.58	-13.2141	1922.45
15	-456.365	34.4154	2014.77	-425.596	-14.1374	2135.98	-374.956	-19.5329	2110.48	-410.476	-24.4657	2108.71	-366.516	-46.9178	1943.58	-337.668	5.07237	2078.92	-392.731	5.19902	2024.48	-339.104	-43.7186	1925.62	-387.926	-13.0107	2042.82
16	-445.265	34.5348	2109.07	-406.86	-16.0366	2219.46	-356.579	-20.465	2205.13	-395.478	-25.8684	2181.77	-377.053	-51.1744	2042.37	-314.385	9.109	2163.99	-377.852	7.19289	2112.15	-396.921	-43.5578	2070.59	-383.799	-13.2832	2138.07
17	-406.539	33.5998	2187.38	-394.683	-17.9643	2319	-334.642	-22.6128	2301.86	-369.626	-28.0493	2254.73	-362.417	-54.1141	2127.84	-313.063	15.416	2262.01	-332.819	8.56209	2177.23	-410.262	-41.5563	2174.14	-365.506	-13.3399	2225.52
18	-381.061	35.192	2280.58	-394.299	-19.3976	2433.63	-327.397	-25.3542	2411.75	-362.919	-29.725	2349.88	-345.259	-54.6174	2222.44	-329.37	21.2718	2371.79	-300.941	10.5862	2256.82	-401.987	-39.3096	2262.47	-355.404	-12.6692	2323.67
19	-387.442	40.4248	2401.91	-409.208	-19.9196	2561.32	-341.475	-27.9208	2537.36	-386.792	-30.2078	2473.68	-336.16	-53.9557	2326.76	-356.232	24.773	2489.37	-303.047	13.8288	2367.3	-393.133	-38.2079	2358.99	-364.186	-11.3982	2439.59
20	-409.794	46.5867	2537.29	-432.683	-19.7912	2694.22	-365.494	-29.3172	2668.01	-423.898	-29.733	2608.11	-343.366	-53.6328	2438.47	-382.329	25.2843	2606.54	-325.132	17.7435	2492.94	-391.624	-38.2862	2468.32	-384.29	-10.1433	2564.24
21	-429.875	50.7723	2670.77	-454.102	-19.5312	2822.27	-386.942	-28.6134	2792.4	-455.054	-28.6072	2733.81	-362.78	-53.8487	2554.21	-396.555	22.3544	2715.14	-350.634	21.7043	2615.93	-400.391	-39.0625	2587.89	-404.542	-9.354	2686.55
22	-440.532	52.5119	2795.8	-465.6	-19.5234	2938.09	-400.891	-26.3974	2908.34	-472.53	-26.9933	2844.81	-380.266	-53.7424	2669.78	-398.244	16.8832	2814.14	-370.868	25.3676	2729.76	-420.245	-40.1881	2714.55	-418.647	-9.01024	2801.91
23	-444.195	53.4424	2913.95	-470.374	-19.6084	3045.19	-408.972	-24.5713	3021.5	-478.5	-24.9301	2946.73	-384.647	-52.6016	2781.54	-395.757	10.9389	2908.72	-383.966	28.6341	2837.75	-443.579	-41.8503	2842.75	-426.249	-8.81827	2912.27
24	-443.586	55.0538	3026.98	-474.381	-19.4914	3149.79	-412.999	-24.8257	3137.09	-475.61	-22.5211	3045.24	-379.984	-50.5557	2888.56	-396.774	6.37937	3003.71	-388.868	31.3913	2943.37	-460.685	-44.3694	2966.37	-429.111	-8.61734	3020.14
25	-441.207	57.1194	3136.08	-481.324	-19.1138	3256.01	-414.54	-26.8316	3254.22	-467.657	-20.4174	3143.22	-374.745	-47.9838	2990.73	-401.21	3.08654	3099.26	-389.156	33.3596	3048.5	-465.684	-47.789	3081.91	-429.44	-8.57125	3126.24
26	-439.453	58.5938	3242.19	-488.995	-19.0365	3362.51	-415.039	-29.2969	3369.14	-458.984	-19.5312	3242.19	-373.63	-45.4874	3089.71	-405.273	0	3193.36	-390.625	34.1797	3154.3	-462.741	-51.4252	3192.73	-429.342	-9.00046	3230.76
27	-439.862	58.7896	3346.05	-494.238	-19.9136	3467.04	-415.342	-31.2254	3478.87	-452.862	-20.4648	3342.78	-375.226	-44.0299	3189.97	-405.973	-3.40906	3284.3	-397.024	33.5789	3261.26	-457.622	-54.4808	3303.28	-429.769	-10.1444	3334.19
28	-440.528	58.4725	3447.78	-495.12	-21.8055	3568.23	-413.888	-32.8288	3583.56	-448.245	-22.5736	3441.96	-377.632	-44.4935	3295.68	-403.615	-5.51996	3371.79	-403.856	31.634	3367.26	-453.829	-56.5567	3415.06	-429.589	-11.7089	3436.42
29	-438.694	58.7702	3547.32	-491.849	-23.7253	3666.14	-408.519	-34.6181	3684.16	-443.017	-24.9033	3535.83	-379.73	-46.5114	3404.76	-399.329	-4.18494	3455.9	-404.588	28.5104	3469.53	-450.875	-57.9551	3524.32	-427.075	-13.0772	3535.99
30	-432.968	60.6643	3644.41	-484.869	-24.6097	3760.98	-398.24	-36.7276	3781.31	-436.111	-26.8366	3622.61	-380.887	-48.9483	3511.31	-394.103	1.07372	3537.21	-396.23	24.6433	3565.84	-447.864	-59.0521	3626.89	-421.409	-13.7241	3631.32
31	-424.821	64.8297	3738.42	-475.066	-24.3897	3852.36	-384.482	-38.5009	3875.11	-428.66	-28.4618	3704.96	-380.218	-50.9533	3610.47	-388.638	7.23159	3617.39	-383.227	21.0323	3655.04	-443.873	-60.306	3721.55	-413.623	-13.6898	3721.91
32	-416.029	71.8396	3828.68	-463.858	-24.1935	3939.13	-368.971	-39.2098	3965.53	-422.023	-29.9574	3786.09	-375.962	-52.6855	3701.29	-383.551	10.9053	3698.15	-370.842	18.708	3736.24	-437.943	-62.2745	3810.59	-404.897	-13.3585	3808.21
33	-406.748	80.3545	3914.84	-452.614	-25.1466	4020.12	-352.956	-38.9691	4050.85	-415.977	-31.5325	3867.35	-366.241	-54.5107	3783.67	-378.095	11.1966	3778.38	-360.769	17.4644	3810.71	-429.174	-65.4609	3896.42	-395.322	-13.3255	3890.29
34	-395.26	86.8238	3996.95	-441.312	-27.1241	4094.53	-337.142	-38.8677	4127.45	-408.472	-33.4319	3948.01	-351.551	-56.483	3858.98	-369.944	10.0811	3853.72	-350.569	15.667	3882.32	-417.673	-69.3577	3979.74	-383.99	-14.0866	3967.71
35	-379.899	87.9092	4074.97	-428.78	-28.9637	4161.84	-322.085	-39.939	4191.95	-397.546	-35.9001	4026.99	-335.31	-58.2732	3930.45	-356.909	9.54026	3919.96	-337.765	11.7692	3954.67	-404.381	-72.619	4059.84	-370.334	-15.8095	4040.08
36	-360.827	84.1753	4147.46	-413.937	-29.6087	4221.59	-306.979	-41.938	4245.46	-383.469	-39.1563	4100.67	-320.592	-59.5106	4000.82	-339.428	9.77014	3977.11	-322.093	6.1765	4026.73	-390.185	-74.0269	4135.89	-354.689	-18.0148	4106.97
37	-339.384	78.7044	4212.15	-396.94	-29.349	4274.1	-290.138	-43.7948	4291.96	-367.949	-43.4034	4163.79	-306.46	-59.6874	4068.59	-319.631	9.81451	4027.84	-304.718	0.553426	4094.48	-375.153	-73.8699	4206.31	-337.547	-20.129	4167.4
38	-316.826	74.1823	4267.09	-378.645	-29.2385	4320.09	-270.138	-44.6063	4334.86	-352.278	-48.6967	4212.34	-290.134	-58.2332	4130.29	-299.339	8.85891	4074.48	-286.605	-3.72027	4154.48	-358.892	-73.2919	4269.11	-319.107	-21.8432	4220.34
39	-293.839	70.8409	4312.52	-359.724	-30.1712	4360.23	-247.102	-44.4784	4373.94	-335.271	-54.2659	4249.44	-270.243	-54.9881	4183.57	-278.457	6.98933	4116.93	-267.47	-6.97638	4206.85	-340.979	-73.2485	4322.64	-299.136	-23.2873	4265.76
40	-270.907	68.0588	4349.41	-339.637	-31.9997	4394.77	-221.689	-43.8679	4407.75	-314.889	-59.0546	4280.7	-248.998	-50.8242	4228.99	-256.23	4.60493	4154.26	-246.596	-10.1413	4252.89	-320.841	-73.4752	4367.3	-277.473	-24.5874	4304.51
41	-247.963	65.5225	4378.77	-317.383	-34.1797	4423.83	-194.507	-43.2695	4434.95	-290.085	-62.2294	4309.66	-229.013	-46.74	4267.51	-232.271	2.18382	4185.98	-223.502	-13.7813	4293.36	-297.852	-73.2422	4404.3	-254.072	-25.717	4337.29
42	-223.359	63.8051	4401.73	-292.232	-36.2339	4447.29	-166.007	-43.2858	4454.53	-262.689	-63.6009	4333.9	-209.828	-43.0541	4299.34	-207.26	0.430325	4212.83	-198.382	-17.4248	4327.31	-271.762	-72.0261	4434.59	-228.94	-26.4238	4363.94
43	-195.191	63.6282	4419.45	-264.54	-37.9559	4464.21	-136.613	-44.5252	4465.58	-235.024	-63.1033	4349.95	-188.119	-39.4509	4324.01	-182.059	0.080615	4235.77	-171.552	-20.4209	4353.5	-243.848	-70.1326	4458.12	-202.118	-26.485	4383.82
44	-163.441	65.0947	4432.6	-234.935	-39.2072	4473.47	-106.731	-46.7813	4468.44	-208.367	-61.2006	4356.74	-161.212	-35.6702	4341.19	-157.217	1.35628	4254.28	-143.52	-22.4856	4371.51	-215.766	-68.0745	4474.56	-173.899	-25.871	4396.6
45	-131.002	67.3494	4441.1	-204.137	-39.8445	4474.67	-76.741	-48.5846	4465.45	-182.369	-59.1772	4356.83	-130.614	-31.8902	4351.57	-132.79	3.68127	4265.62	-115.088	-23.9039	4382.16	-188.522	-66.2217	4483.7	-145.158	-24.8239	4402.64
46	-100.863	69.4899	4444.82	-173.112	-39.7133	4469.46	-46.9946	-48.4479	4458.93	-156.545	-58.3143	4353.02	-99.2537	-28.435	4356.18	-108.765	6.40365	4267.06	-87.0332	-25.0197	4386.34	-161.416	-64.5697	4485.54	-116.748	-23.5758	4402.67
47	-73.1365	71.2405	4443.36	-142.855	-38.6608	4459.77	-17.3566	-46.5084	4448.08	-130.459	-58.5582	4346.73	-69.0164	-25.2077	4355.59	-84.6462	8.74051	4260.17	-59.2542	-26.3589	4384.65	-133.485	-63.0526	4480.15	-88.7761	-22.2957	4397.31
48	-45.4546	72.8684	4436.07	-113.728	-36.846	4446.32	12.7279	-44.3094	4429.4	-103.725	-58.701	4338.14	-39.8365	-21.3222	4349.45	-59.5233	9.79571	4250.16	-30.8871	-28.6052	4377.35	-104.423	-61.5411	4468.45	-60.6061	-21.0826	4386.92
49	-15.6512	74.5133	4422.37	-84.9671	-34.9774	4427.68	43.6349	-43.2622	4400.09	-76.0356	-57.6649	4327.12	-11.4369	-15.9288	4337.38	-32.6178	8.85839	4241.59	-1.21954	-32.2583	4364.77	-75.0941	-59.7944	4452.93	-31.6734	-20.0643	4371.74
50	16.1711	75.1599	4402.03	-55.7238	-33.8044	4402.25	74.2032	-43.3659	4363.56	-47.7478	-55.7047	4311.27	16.4203	-9.80545	4319.62	-4.32185	6.71875	4232.7	29.0597	-36.3165	4347.48	-46.4637	-57.578	4436.15	-2.30035	-19.337	4351.88
51	48.8281	73.2422	4375	-26.0695	-33.5761	4370.08	102.539	-43.9453	4326.17	-19.5312	-53.7109	4287.11	43.9453	-4.88281	4296.88	24.4141	4.88281	4218.75	58.5938	-39.0625	4326.17	-18.8763	-55.2316	4418.19	26.7304	-19.0355	4327.29
52	81.2576	67.9955	4341.84	2.81447	-33.9394	4333.16	127.548	-44.3947	4292.34	7.98228	-52.496	4253.58	71.3938	-2.45273	4269.87	52.8215	4.43572	4196.21	86.3244	-39.411	4301.39	8.06926	-53.7876	4396.19	54.7764	-19.2563	4298.07
53	112.909	61.8739	4305.51	29.7695	-34.5026	4293.57	151.35	-44.4008	4258.47	34.3188	-52.5438	4219.31	99.2094	-1.15337	4239.4	80.8709	4.76155	4166.66	112.403	-38.8235	4272.94	34.8187	-54.2383	4367.25	81.9562	-19.8784	4265.39
54	143.361	58.1266	4269.56	55.1241	-34.8353	4252.64	176.856	-43.7244	4218.98	59.0492	-54.253	4195.29	127.859	1.01256	4206.29	108.716	4.82335	4132.9	137.286	-39.392	4240.47	61.8242	-56.2168	4331.13	108.759	-20.5574	4230.91
55	172.362	58.4716	4234.68	80.4405	-34.4749	4211.1	205.233	-42.2786	4170.65	82.5889	-57.5663	4182.84	156.765	4.72408	4170.7	136.155	4.27577	4096.61	161.563	-42.2283	4203.94	89.5421	-58.2274	4289.82	135.581	-20.913	4195.04
56	200.013	61.416	4195.63	107.137	-33.0458	4169.46	233.981	-40.2958	4115.13	107.124	-61.4701	4162.89	183.869	8.79882	4131.93	162.248	4.22371	4057.02	186.108	-46.3881	4164.01	118.34	-58.9112	4245.22	162.352	-20.709	4155.16
57	226.453	65.0936	4146.59	134.853	-31.0385	4126.36	260.215	-38.0521	4054.72	134.972	-64.8473	4114.51	207.37	12.0055	4089.17	185.992	5.91573	4013.09	211.799	-50.6856	4121.36	147.705	-58.5832	4197.97	188.67	-20.024	4107.97
58	251.69	68.5823	4087.41	162.216	-29.4353	4079.43	283.286	-35.9321	3991.52	165.727	-67.0994	4036.73	228.824	13.9464	4041.58	207.401	9.41882	3964.91	238.504	-54.4604	4075.2	176.628	-58.5092	4147.99	214.285	-19.1861	4053.1
59	275.571	72.0508	4024.52	188.006	-29.0179	4026.64	305.131	-34.4453	3927.46	195.833	-68.2273	3951.69	251.579	14.6688	3988.23	227.661	13.434	3913.88	264.928	-57.659	4023.06	204.181	-59.7198	4095.03	239.111	-18.6145	3993.81
60	297.971	75.6983	3964.15	212.005	-29.2965	3968.45	327.666	-34.0348	3864.15	221.818	-68.3128	3880.94	277.513	14.4635	3928.69	247.968	16.6595	3861.27	289.797	-60.2586	3962.7	229.994	-61.7299	4037.8	263.091	-18.3514	3933.52
61	319.135	79.3693	3905.88	234.375	-29.2969	3906.25	350.886	-34.2891	3799.5	243.267	-67.9905	3824.13	304.166	14.3206	3863.91	268.875	18.6476	3806.37	312.869	-62.1985	3895.69	253.906	-63.4766	3974.61	285.935	-18.1143	3872.04
62	339.553	82.6792	3845.02	255.374	-28.2731	3841.09	373.548	-34.2452	3729.08	261.735	-68.2511	3766.81	328.373	15.3146	3795.07	290.514	19.5015	3747.17	334.569	-63.3935	3826.08	275.852	-64.151	3904.77	307.44	-17.6023	3806.89
63	359.607	85.2801	3777.53	275.636	-26.3969	3772.67	394.404	-33.1194	3649.19	278.637	-69.8242	3696.91	349.213	17.3992	3722.46	312.791	19.4288	3682	355.236	-63.8103	3757.14	296.136	-63.9655	3831.61	327.707	-16.876	3736.19
64	379.066	87.0501	3703.33	295.888	-24.0692	3700.34	412.298	-31.183	3560.64	294.425	-71.9425	3617.32	368.168	19.327	3645.42	334.378	19.1697	3611.34	374.677	-63.709	3687.62	315.154	-63.3877	3759.44	346.757	-16.0931	3660.68
65	397.49	87.9457	3623.74	316.228	-21.7471	3623.28	426.102	-29.0736	3465.78	309.215	-73.319	3536.06	386.526	20.011	3563.51	353.514	19.6494	3536.43	392.516	-63.4514	3614.69	333.164	-62.8807	3690.15	364.344	-15.3582	3581.7
66	414.516	88.0616	3539.67	335.103	-20.0342	3540.25	435.329	-27.2354	3366.56	323.252	-73.2832	3457.85	403.551	19.7782	3477.69	369.17	21.336	3458.17	408.396	-63.318	3536.55	350.05	-62.8963	3619.21	379.921	-14.6989	3499.49
67	430.013	87.8888	3450.82	350.705	-19.5491	3449.96	441.318	-25.5538	3263.7	337.152	-72.9398	3377.86	417.708	19.5161	3389.52	382.417	23.3831	3376.6	422.012	-63.355	3454.47	365.642	-63.8787	3541.1	393.371	-14.311	3413
68	443.893	87.9804	3356.68	362.361	-20.1373	3352.71	445.727	-23.8174	3157.7	351.585	-73.6917	3289.62	428.296	19.6671	3299.41	394.686	24.72	3291.58	433.084	-63.5645	3370.19	379.927	-65.7773	3453.14	404.945	-14.3276	3321.38
69	455.882	88.3716	3257.21	371.398	-20.2832	3251.58	449.565	-21.9749	3048.25	366.419	-75.798	3190.72	436.433	19.7059	3205.38	406.391	24.9235	3202.77	442.011	-63.8062	3283.21	393.173	-67.6698	3357.64	415.159	-14.5664	3224.6
70	465.436	88.2943	3153.06	379.322	-18.3832	3149.86	452.844	-20.2234	2933.78	380.281	-77.7458	3085.07	443.409	19.0052	3105.24	416.375	24.5732	3109.49	450.253	-63.7196	3189.49	405.661	-68.5725	3257.4	424.198	-14.5965	3122.92
71	471.987	86.9759	3044.88	386.74	-14.5138	3047.33	455.45	-18.7561	2812.69	391.725	-77.9497	2976.9	449.45	17.3382	2998.66	423.411	24.3102	3011.05	459.224	-62.9405	3084.93	417.101	-68.4091	3153.64	431.886	-14.2431	3016.26
72	475.079	84.8016	2931.71	393.18	-10.7764	2939.57	456.61	-17.3161	2684.6	399.951	-76.2635	2866.6	453.922	14.8038	2886.86	427.443	24.3227	2907.25	467.916	-61.3741	2970.06	426.52	-68.197	3045.74	437.578	-13.7499	2904.05
73	474.35	83.1581	2811.21	398.103	-9.25494	2822.22	454.98	-15.2566	2550.19	404.71	-73.7857	2751.24	456.212	11.5259	2770.54	429.426	24.4073	2798.32	473.23	-59.1592	2849.4	432.937	-68.9598	2932.99	440.493	-13.4156	2785.76
74	469.518	83.1885	2681.46	400.913	-9.71932	2696.1	449.202	-12.0523	2410.01	405.765	-71.5539	2628.18	455.935	7.70163	2647.75	430.168	24.3801	2684.45	472.473	-56.4148	2726.96	435.892	-70.7347	2815.14	439.983	-13.1506	2661.26
75	460.928	83.8389	2544.07	400.97	-10.0192	2566.32	437.952	-8.24439	2263.46	402.811	-69.7973	2498.11	452.767	3.55156	2515.78	429.058	24.3162	2565.55	466.753	-53.0397	2601.82	435.363	-72.7398	2692.26	435.825	-12.7667	2530.92
76	449.219	83.0078	2402.34	397.631	-8.17672	2437.41	419.922	-4.8828	2109.37	395.508	-68.3594	2363.28	446.04	-0.557786	2374.08	424.805	24.4141	2441.41	458.984	-48.8281	2470.7	431.328	-74.1954	2564.34	427.929	-12.1973	2395.37
77	434.787	79.196	2258.59	390.239	-4.47904	2307.08	394.665	-2.70854	1947.44	383.836	-67.0237	2225.49	434.524	-4.02276	2225.54	416.344	24.743	2311.94	451.095	-43.7213	2331.37	423.651	-74.5828	2429.95	416.143	-11.5749	2254.68
78	417.034	73.3394	2111.13	378.13	-0.499058	2169.13	365.181	-1.21499	1780.76	369.063	-65.3438	2084.66	417.126	-6.31082	2073.2	403.535	24.8523	2177.66	441.012	-38.2509	2185.84	412.128	-73.5313	2286.9	400.401	-10.8699	2108.66
79	395.123	66.9798	1957.33	360.925	2.38151	2018.72	335.321	0.413296	1613.31	352.772	-62.818	1940.22	394.797	-7.90182	1917.9	386.473	24.1642	2039.22	425.675	-33.093	2037.15	396.664	-70.8187	2133.86	380.969	-10.0866	1957.21
80	369.279	61.2094	1795.87	339.996	4.05123	1859.7	307.653	2.49499	1447.55	335.914	-59.3345	1791.77	369.743	-9.89878	1759.13	365.909	22.4973	1897.17	403.683	-28.382	1887.23	377.828	-67.1256	1974.97	358.751	-9.31099	1801.67
81	341.958	56.1769	1628.27	317.383	4.88281	1699.22	282.053	4.30705	1282.84	318.114	-55.5983	1639.24	343.841	-12.7671	1596.88	343.968	20.5028	1751.9	377.125	-23.1169	1735.62	356.445	-63.4766	1816.41	335.111	-8.63618	1643.8
82	315.788	51.9075	1456.52	294.792	5.20313	1542.44	257.996	5.02577	1118.39	298.824	-52.3858	1482.7	317.757	-14.7627	1432.85	322.902	18.9294	1603.71	348.509	-16.2072	1581.62	333.315	-60.5228	1662.09	311.235	-7.85159	1485.04
83	290.127	48.281	1285.67	272.594	5.15193	1386.56	233.058	4.75301	961.246	277.392	-49.5108	1324.94	291.85	-13.7336	1269.24	303.457	18.3202	1451.86	319.737	-8.19315	1426.06	309.135	-57.418	1506.8	287.169	-6.54366	1326.54
84	260.552	45.0088	1124.35	250.822	4.82238	1226.76	202.618	4.66066	827.517	253.041	-45.6735	1171.93	264.642	-9.7323	1112.28	284.64	18.9793	1294.35	292.012	-1.50009	1271.52	284.579	-52.9424	1342.99	261.613	-4.54714	1171.46
85	223.101	41.8651	980.999	228.653	4.41071	1063.66	162.86	5.85332	731.927	225.142	-39.6739	1029.8	232.402	-5.52114	973.189	265.116	21.0889	1130.43	266.217	1.57233	1121.03	259.595	-46.51	1170.32	232.886	-2.11435	1025.17
86	181.618	39.4619	859.63	203.011	4.38372	912.073	120.702	7.96051	667.222	194.838	-32.1864	904.288	192.416	-3.66876	861.759	240.64	23.5611	974.466	240.022	1.40742	981.269	232.225	-39.1971	1007.12	200.684	0.215306	895.978
87	144.983	38.9519	761.392	170.514	5.24663	788.973	89.99	9.66007	611.966	164.419	-25.0948	800.899	150.825	-3.99167	774.552	205.095	24.4896	850.575	209.014	0.119355	861.318	200.243	-32.3422	874.641	166.885	2.12985	790.54
88	120.658	40.8516	685.713	132.742	7.03389	701.032	81.3895	9.93294	547.867	136.375	-19.9883	722.791	117.846	-5.03681	702.026	155.579	22.4038	776.428	170.574	-0.466899	767.838	164.6	-26.6955	780.867	134.97	3.50434	710.57
89	107.683	42.0685	622.621	100.014	8.95062	636.736	87.1206	9.54486	475.541	114.204	-16.693	660.045	99.8216	-5.64124	635.687	107.353	18.3503	732.704	132.297	-0.306211	693.796	131.855	-21.9696	710.429	110.044	4.28803	645.945
90	102.175	38.2577	558.885	83.2452	10.1355	582.847	92.9954	9.88137	402.175	101.753	-14.4224	598.195	93.2888	-5.38843	569.748	81.9793	14.2495	687.228	105.326	0.027988	627.402	108.978	-17.7797	645.841	96.2175	4.3702	584.04
91	100.139	27.5809	486.133	83.6153	10.3227	530.253	89.0913	11.6768	332.952	100.138	-12.5409	527.417	93.2762	-4.01026	499.182	90.6205	11.2054	618.399	95.969	0.127431	560.128	97.7287	-14.0093	578.11	93.8223	3.79411	516.572
92	97.2822	15.4138	409.979	90.5678	9.96395	474.807	77.7725	13.7908	267.258	102.624	-10.8488	451.245	94.8922	-1.91179	425.848	114.494	7.96994	535.068	96.6297	0.060755	492.836	93.5862	-10.8653	508.48	95.981	2.94668	445.69
93	89.3031	8.34335	338.454	93.273	9.54328	412.896	63.5713	14.7595	203.486	101.137	-9.22414	375.556	93.3208	-0.12653	358.032	129.688	2.90595	451.419	97.2987	-0.019379	428.043	91.7264	-8.55082	438.753	94.9148	2.2039	375.83
94	74.814	8.30018	274.528	88.0364	9.36867	344.811	49.353	13.819	142.44	91.6345	-7.55643	303.663	84.7209	0.499411	302.118	125.706	-3.75231	375.197	92.3843	-0.03257	366.92	88.5121	-6.88379	369.916	86.8952	1.72026	309.949
95	56.9398	9.9976	213.325	77.0845	9.60199	274.089	35.3986	11.2906	88.6589	76.3172	-5.75237	234.899	70.5951	0.282498	252.671	112.836	-8.87041	304.157	83.1407	-0.010412	308.549	81.2911	-5.36236	302.272	74.2004	1.39714	247.328
96	39.1289	7.83016	149.779	62.7756	10.3229	204.408	21.8239	7.61095	46.8246	57.9213	-3.73683	168.466	54.2655	-0.066223	200.275	102.549	-9.26567	235.393	71.3579	0.007362	251.84	67.8479	-3.54031	236.21	59.7087	1.14529	186.65
97	23.6578	1.61581	87.4935	47.0073	10.8461	139.898	9.75997	3.61132	18.4108	39.1392	-1.73259	107.32	38.3455	-0.128535	141.846	95.4298	-5.37283	169.419	57.8677	0.007837	195.811	49.9664	-1.61313	173.169	45.1467	0.904245	129.171
98	11.7899	-4.13645	37.5702	31.4148	10.0521	84.9404	1.2157	0.464406	2.11559	22.6258	-0.220125	57.6662	24.1192	-0.03541	86.1693	82.6521	-0.755559	109.713	42.6729	0.001295	139.569	31.6999	-0.140409	115.175	31.0238	0.653735	79.1149
99	4.53305	-5.37792	9.7022	17.5763	7.12652	43.3479	-2.14582	-0.821023	-3.7183	10.7442	0.388927	24.9226	12.6831	0.031986	42.8322	56.8556	1.34136	59.7626	26.0431	-0.002315	83.0908	16.7128	0.424361	64.4887	17.8753	0.388986	40.5536
100	1.13412	-2.9442	0.425059	6.73353	3.16699	15.3931	-1.63943	-0.62727	-2.84082	3.5503	0.297144	7.39528	4.58834	0.027372	14.7254	24.8049	1.02481	22.3675	10.5805	-0.001769	33.2029	6.10519	0.308789	24.7203	6.98217	0.156484	14.4236
101	0	0	0	0	0	0	0	0	0	0	0	0	0	0	0	0	0	0	0	0	0	0	0	0	0	0	0

## Sheet: HORSE 10 RH
	RHGRFZ	RHGRFZ	RHGRFZ	RHGRFZ	RHGRFZ	RHGRFZ	RHGRFZ	RHGRFZ	RHGRFZ	RHGRFZ	RHGRFZ	RHGRFZ	RHGRFZ	RHGRFZ	RHGRFZ	RHGRFZ	RHGRFZ	RHGRFZ	RHGRFZ	RHGRFZ	RHGRFZ	RHGRFZ	RHGRFZ	RHGRFZ
	LINK_MODEL_BASED	LINK_MODEL_BASED	LINK_MODEL_BASED	LINK_MODEL_BASED	LINK_MODEL_BASED	LINK_MODEL_BASED	LINK_MODEL_BASED	LINK_MODEL_BASED	LINK_MODEL_BASED	LINK_MODEL_BASED	LINK_MODEL_BASED	LINK_MODEL_BASED	LINK_MODEL_BASED	LINK_MODEL_BASED	LINK_MODEL_BASED	LINK_MODEL_BASED	LINK_MODEL_BASED	LINK_MODEL_BASED	LINK_MODEL_BASED	LINK_MODEL_BASED	LINK_MODEL_BASED	LINK_MODEL_BASED	LINK_MODEL_BASED	LINK_MODEL_BASED
	PROCESSED	PROCESSED	PROCESSED	PROCESSED	PROCESSED	PROCESSED	PROCESSED	PROCESSED	PROCESSED	PROCESSED	PROCESSED	PROCESSED	PROCESSED	PROCESSED	PROCESSED	PROCESSED	PROCESSED	PROCESSED	PROCESSED	PROCESSED	PROCESSED	PROCESSED	PROCESSED	PROCESSED
ITEM	X	Y	Z	X	Y	Z	X	Y	Z	X	Y	Z	X	Y	Z	X	Y	Z	X	Y	Z	X	Y	Z	X	Y	Z
1	-297.852	39.0625	263.672	68.3594	48.8281	48.8281	34.1797	4.88281	78.125	-29.2969	58.5938	156.25	-566.406	-92.7734	917.969	-19.5312	4.88281	39.0625	-48.8281	9.76562	107.422	-517.578	-53.7109	615.234	-172.119	2.44141	278.32
2	-316.011	1.92156	417.495	38.7192	56.2213	113.373	-125.02	-5.26174	262.482	-181.379	68.0707	349.121	-506.734	-77.2696	919.682	24.8154	47.3138	160.326	-50.7038	46.4452	255.847	-577.546	-36.9303	738.362	-211.732	12.5639	402.086
3	-292.77	-44.0656	596.016	3.64458	52.7449	204.083	-314.76	-22.069	492.138	-345.431	70.31	568.076	-338.528	-39.9595	784.962	56.476	93.0548	322.142	-54.3059	92.3391	436.705	-562.459	-6.27747	804.253	-231.017	24.5096	526.047
4	-252.009	-75.2332	770.524	1.67254	35.4278	314.704	-433.087	-43.5398	696.858	-421.563	68.6699	737.921	-183.851	-0.993744	675.067	17.5421	112.442	483.814	-76.9582	130.954	601.252	-500.829	23.9829	841.996	-231.135	31.4637	640.267
5	-216.794	-69.2269	913.531	63.1581	2.73373	439.248	-394.551	-66.884	816.033	-333.847	66.3162	800.331	-136.29	23.6262	713.955	-126.86	84.7776	610.905	-127.761	148.939	710.843	-420.135	41.2129	878.923	-211.635	28.9369	735.471
6	-195.396	-27.6154	1019.82	152.711	-35.3438	573.84	-246.332	-82.9572	866.409	-146.32	65.2893	795.515	-164.704	36.0739	862.158	-310.693	28.644	696.403	-179.793	146.717	771.079	-339.563	45.8462	928.266	-178.761	22.0818	814.186
7	-183.154	27.1312	1103.62	203.274	-63.2582	715.624	-99.4857	-79.5545	901.988	26.3241	67.2223	799.342	-203.806	43.4989	1035.47	-440.292	-26.6228	740.806	-196.269	128.481	799.674	-274.3	44.6123	996.464	-145.964	17.6887	886.624
8	-174.976	71.8454	1179.84	151.479	-66.3354	861.691	-60.2082	-45.4906	974.652	82.125	73.2753	879.156	-201.561	51.3322	1165.5	-444.368	-56.5079	749.31	-153.24	99.2581	814.949	-238.705	44.0306	1089.43	-129.932	21.426	964.317
9	-167.88	90.5424	1260.48	5.96271	-46.7145	1008.01	-137.113	11.1827	1092.65	30.5555	80.495	1027.63	-169.557	56.7563	1259.78	-359.016	-59.6357	749.652	-88.3591	68.0987	838.138	-232.246	45.9851	1204.22	-139.707	30.8387	1055.07
10	-165.088	88.3648	1349.1	-161.176	-21.3526	1149.59	-252.814	65.459	1225.79	-61.5342	83.81	1199	-138.444	54.4822	1348.57	-252.512	-41.5644	776.327	-57.7391	45.2553	891.348	-241.268	48.2744	1330.07	-166.322	40.3411	1158.73
11	-170.958	74.321	1447.7	-276.302	-7.55178	1281.43	-327.659	92.0129	1342.83	-130.457	78.5536	1349.8	-133.527	40.8459	1457.18	-182.549	-8.70528	856.936	-103.975	38.3871	991.174	-251.766	48.5749	1456.03	-197.149	44.5548	1272.89
12	-189.335	57.0637	1557.98	-307.126	-12.0913	1402.4	-326.217	82.5025	1431.71	-161.897	65.7882	1472.06	-151.978	20.7347	1584.67	-151.122	28.0483	982.811	-198.527	41.5076	1125.21	-256.211	45.7223	1576.16	-217.802	41.1595	1391.63
13	-217.822	40.9405	1678.05	-287.309	-24.9636	1517.52	-283.592	55.6782	1510.92	-177.123	50.7052	1583.38	-181.748	1.83838	1721.52	-141.977	56.3345	1133.4	-289.55	44.1585	1271.54	-257.405	40.401	1692.58	-229.566	33.1366	1513.61
14	-249.871	27.4344	1803.64	-256.404	-34.6628	1632.35	-241.188	32.7079	1601.67	-197.533	38.4428	1701.38	-211.989	-9.5217	1858.96	-141.158	66.0521	1290.15	-333.993	37.7772	1411.48	-259.074	33.461	1808.09	-236.401	23.9614	1638.46
15	-278.869	17.973	1930.41	-243.528	-33.4954	1750.89	-228.313	27.491	1717.62	-229.469	30.8216	1830.47	-238.817	-14.9302	1992.72	-148.038	60.1545	1446.11	-339.666	24.7583	1544.96	-263.95	25.908	1924.46	-246.331	17.3351	1767.21
16	-300.1	13.2406	2054.77	-246.488	-25.2039	1872.53	-237.991	32.1233	1849.79	-264.219	26.3447	1961.87	-260.841	-18.8022	2120.1	-166.767	46.2686	1598.49	-332.587	11.4191	1678.55	-271.791	19.2151	2040.3	-260.098	13.0757	1897.05
17	-312.997	12.2948	2174.64	-257.248	-15.6661	1995.78	-256.474	34.6301	1984.97	-292.522	23.3881	2086.35	-276.892	-24.8405	2238.82	-199.968	31.3298	1744.79	-335.216	3.21492	1817.53	-281.796	14.9427	2153.63	-276.639	9.91173	2024.56
18	-317.54	13.9779	2288.2	-268.513	-9.84797	2119.15	-271.675	25.1838	2111.82	-310.018	21.1095	2199.94	-287.186	-32.2087	2349.2	-240.561	17.852	1884.42	-347.307	0.104011	1958.63	-293.004	14.2751	2262.67	-291.975	6.30571	2146.75
19	-313.991	17.0853	2393.84	-277.371	-7.32486	2241.27	-281.354	6.65311	2229.99	-319.145	19.7516	2305.95	-292.483	-38.2972	2452.56	-277.678	6.622	2017.51	-359.744	-0.102923	2095.29	-303.493	16.1732	2366.85	-303.157	2.57003	2262.91
20	-304.987	20.0158	2492.18	-282.516	-5.69789	2360.8	-286.871	-13.4436	2343.16	-322.835	19.6343	2408.24	-293.514	-40.8974	2550.25	-301.566	-1.86287	2143.82	-364.511	0.632046	2221.59	-310.989	18.7837	2466.03	-308.474	-0.354507	2373.26
21	-294.358	20.9683	2584.91	-282.788	-2.72248	2476.47	-289.551	-28.0651	2454.79	-323.25	20.7843	2509.32	-290.817	-40.6265	2643.79	-310.326	-9.09329	2260.41	-361.403	1.96584	2336.31	-313.411	20.3627	2560.21	-308.238	-2.05328	2478.28
22	-285.904	18.1627	2673.72	-278.834	1.86785	2587.66	-290.191	-36.2595	2565.39	-321.056	22.6585	2609.18	-284.847	-39.3049	2734.78	-305.4	-17.4067	2363.18	-353.543	4.24481	2440.21	-311.108	20.5606	2650.85	-303.86	-3.18458	2578.12
23	-280.676	11.3999	2758.94	-272.535	6.98806	2694.22	-289.22	-41.2351	2673.43	-316.745	24.6486	2707.51	-276.156	-38.5701	2824.58	-288.797	-28.5968	2449.17	-343.877	7.68289	2534.47	-306.089	19.9802	2740.44	-296.762	-4.71279	2672.84
24	-275.192	3.08769	2838.64	-265.761	11.5551	2796	-287.054	-46.214	2777.39	-310.668	26.335	2803.9	-266.03	-38.6191	2912.65	-266.754	-40.2546	2524.23	-333.891	11.4566	2623.25	-300.363	19.238	2831.42	-288.214	-6.67692	2763.44
25	-265.547	-4.12296	2910.7	-259.104	15.4607	2893.01	-283.733	-52.0985	2876.75	-302.78	27.8204	2897.71	-256.1	-38.981	2997.61	-247.474	-48.0225	2598.27	-324.401	14.2615	2712.17	-294.785	18.7888	2923.92	-279.241	-8.36171	2851.27
26	-248.824	-7.8883	2973.94	-251.579	19.8006	2985.39	-278.838	-56.9268	2972.2	-292.969	29.2969	2988.28	-247.678	-39.2211	3078.29	-238.148	-48.1062	2680.22	-316.076	15.0099	2806.1	-288.789	18.8874	3015.2	-270.363	-8.64346	2937.45
27	-228.113	-7.73285	3032.99	-242.106	25.7411	3073.32	-271.921	-58.5647	3064.54	-281.134	30.8978	3074.9	-239.37	-39.2413	3155.57	-237.301	-41.5818	2770.38	-308.407	14.4765	2903.9	-281.721	19.7753	3102.35	-261.259	-7.02876	3022.24
28	-208.762	-3.88307	3094.66	-230.096	33.6149	3157.25	-262.798	-55.9684	3154.37	-267.22	32.5223	3156.78	-228.419	-39.1135	3231.31	-239.087	-31.9819	2864.71	-300.289	14.3749	3001.37	-273.025	21.4261	3183.4	-251.212	-3.62607	3105.48
29	-195.996	3.40701	3165.6	-216.07	41.8603	3238.32	-251.881	-50.5714	3241.92	-251.18	34.0111	3233.08	-212.434	-38.9176	3307.17	-238.04	-22.6743	2959.27	-290.715	16.2283	3094.62	-262.377	23.2052	3258.46	-239.837	0.818564	3187.3
30	-190.504	12.9397	3246.16	-200.706	48.6537	3317.76	-239.668	-44.1495	3327.36	-233.007	35.2723	3303.31	-192.574	-38.7995	3382.47	-232.576	-15.3043	3051.32	-279.626	19.7006	3182.72	-249.48	24.3937	3327.93	-227.268	5.33832	3267.38
31	-187.29	22.335	3328.87	-184.594	52.5812	3396.38	-226.477	-38.2513	3410.61	-212.915	36.6085	3368.84	-171.945	-38.9409	3455.29	-223.237	-10.5734	3138.78	-267.487	23.4367	3266.42	-234.099	24.3836	3392.35	-213.505	8.94743	3344.69
32	-181.001	29.1382	3405.75	-167.96	54.033	3473.09	-211.862	-33.4251	3490.51	-191.196	38.4649	3431.72	-153.362	-39.5276	3523.75	-210.519	-9.07474	3219.68	-254.696	26.1814	3346.34	-216.251	23.0546	3452.85	-198.356	11.1056	3417.96
33	-167.458	31.5909	3470.78	-150.929	53.8959	3546.32	-195.159	-29.9437	3565.58	-168.18	41.1417	3493.61	-136.409	-40.7866	3586.9	-194.247	-10.3738	3293.1	-240.926	27.8254	3422.21	-196.025	20.421	3510.72	-181.167	11.7214	3486.15
34	-147.705	31.0237	3526.65	-133.536	52.9979	3614.68	-175.782	-28.0444	3634.6	-144.498	43.6732	3552.74	-118.754	-42.9691	3644.32	-173.839	-13.4245	3358.78	-225.416	28.9416	3493.2	-173.558	16.5408	3567.03	-161.636	11.0924	3549
35	-124.231	29.6233	3578.45	-115.028	51.6402	3678.78	-153.789	-27.6472	3698.6	-120.944	44.4424	3605.58	-98.2038	-46.3076	3695.58	-148.878	-17.1909	3416.61	-207.461	30.0353	3558.52	-149.43	11.8669	3620.79	-139.745	9.55783	3606.61
36	-99.4782	29.4801	3631.09	-94.2365	49.8464	3740.24	-129.579	-28.5051	3759.8	-98.2511	41.9824	3648.9	-74.5258	-50.8123	3740.15	-120.909	-20.8479	3468.45	-187.078	30.7262	3618.19	-124.453	7.0598	3669.91	-116.064	7.3662	3659.59
37	-74.8625	30.6303	3685.07	-70.0605	47.6348	3800.61	-103.562	-30.3717	3820.27	-76.3985	36.9406	3683.9	-48.7501	-56.3502	3777.43	-92.7449	-23.7066	3517.44	-164.754	30.0621	3672.74	-99.4263	2.76555	3712.43	-91.3198	4.7006	3708.74
38	-50.8193	31.1469	3736.71	-42.925	44.9652	3859.03	-76.3439	-33.0484	3879.09	-54.8165	31.4881	3714.99	-21.8943	-62.7591	3806.97	-66.9949	-25.1826	3566.32	-140.951	27.1726	3722.62	-74.8216	-0.715773	3748.22	-66.1958	1.63337	3754.24
39	-27.7447	29.0245	3782.15	-14.7181	41.7411	3912.35	-48.7156	-36.3817	3932.45	-32.9279	27.7539	3746.46	5.4663	-69.5261	3830.21	-43.3926	-26.0217	3612.74	-115.777	22.3713	3767.27	-50.7973	-3.41586	3779.02	-41.0758	-1.8068	3795.33
40	-5.56164	22.9804	3818.4	12.6268	37.8656	3957.34	-21.468	-40.2205	3976.43	-10.2486	26.1222	3778.16	33.0649	-75.8935	3849.98	-19.6594	-27.9001	3650.76	-89.0876	16.8004	3805.41	-27.4963	-5.38158	3806.6	-15.9787	-5.70339	3830.38
41	17.3483	14.0851	3845.19	38.3127	33.4035	3992.79	5.21428	-44.4596	4009.52	13.6121	25.2321	3805.55	60.6504	-81.1278	3868.81	6.31706	-32.3413	3674.89	-60.7825	11.5567	3835.88	-4.83262	-6.8091	3831.57	9.47997	-10.0575	3858.03
42	42.9165	3.88749	3862.83	63.5206	28.7005	4020.95	32.203	-49.0728	4034.33	39.0273	23.6655	3823.93	88.1057	-84.9243	3885.36	33.6076	-38.3583	3687.41	-31.4689	6.8291	3859.6	17.6781	-8.15445	3852.56	35.6987	-14.6784	3878.37
43	72.8761	-6.09321	3871.71	89.629	24.1305	4044.39	60.4755	-54.0419	4053.9	65.751	20.8396	3831.72	115.415	-87.303	3895.32	58.9789	-43.0628	3696.4	-2.29009	2.11893	3879.1	40.5602	-9.89964	3867.98	62.6744	-19.1639	3892.57
44	106.224	-14.7425	3873.52	117.549	20.0624	4064.81	90.5382	-59.2221	4070.39	92.6783	17.3306	3831.6	142.541	-88.3117	3894.64	79.3893	-43.6974	3709.69	25.6425	-3.04452	3896.76	64.191	-12.3841	3876.78	89.8442	-23.0012	3902.27
45	139.965	-21.2413	3870.88	146.648	16.8483	4080.94	121.345	-64.0507	4083.18	118.648	13.7975	3826.56	169.068	-88.3251	3884.88	95.8986	-40.4514	3727.6	51.9643	-8.38648	3912.26	88.4645	-15.4771	3879.65	116.5	-25.9108	3908.24
46	171.058	-24.7787	3866.4	175.976	14.8367	4090.9	151.532	-67.8793	4091.07	143.309	10.6126	3818.17	194.265	-87.9856	3872.2	112.931	-35.9313	3744.37	76.9237	-13.0206	3923.1	113.175	-18.9507	3877.66	142.396	-27.8871	3910.48
47	197.524	-25.0845	3861.8	204.658	14.254	4093.11	179.963	-70.2082	4092.95	167.887	7.59019	3805.25	217.436	-87.9121	3862.54	134.774	-32.7313	3754.22	100.811	-16.0939	3926.8	138.08	-22.5561	3871.66	167.642	-29.0927	3908.54
48	219.934	-23.1924	3856.57	232.301	14.5266	4088.19	207.023	-71.512	4088.58	193.786	4.48137	3786.32	238.698	-88.1275	3854.43	161.249	-31.8826	3754.81	124.361	-17.717	3922.93	162.702	-25.9052	3861.27	192.507	-29.9161	3901.64
49	239.236	-20.3286	3849.88	258.707	14.76	4077.58	233.703	-72.6566	4078.01	221.481	1.40199	3760.47	258.891	-88.1259	3839.92	188.218	-33.0277	3746.89	148.704	-18.8562	3912.9	186.466	-28.5543	3845.58	216.926	-30.6734	3888.9
50	256.407	-17.6539	3840.87	283.721	14.1164	4062.68	260.925	-74.4346	4061.34	248.877	-0.523998	3728.48	278.846	-87.4037	3811.14	211.594	-35.7702	3731.23	174.919	-20.4625	3898.1	208.85	-30.0861	3823.75	240.517	-31.5273	3869.7
51	272.691	-15.7095	3828.82	307.765	12.5831	4043.82	288.598	-76.5791	4039.15	273.438	0	3691.41	298.672	-85.9065	3767.97	231.416	-39.9106	3707.42	202.704	-22.5247	3878.65	230.057	-30.467	3795.89	263.168	-32.3143	3844.14
52	289.477	-14.6937	3813.01	331.696	10.7606	4020.55	315.878	-78.0352	4012.39	293.386	3.71167	3650	317.783	-84.0108	3717.65	251.689	-45.4391	3673.91	230.431	-24.1059	3853.47	250.83	-29.9483	3762.78	285.146	-32.7201	3812.97
53	308.144	-14.7964	3792.76	356.356	9.26018	3992.41	341.907	-77.7471	3982	309.98	9.11308	3603.75	335.588	-82.1036	3667.49	276.424	-52.3015	3629.2	256.454	-24.2656	3821.47	271.91	-28.7884	3725.21	307.095	-32.7037	3776.79
54	328.869	-15.7136	3767.85	381.618	8.51605	3959.31	366.115	-75.4244	3948.39	325.235	14.1474	3551.85	352.034	-80.3865	3618.84	305.816	-59.1557	3574.16	280.072	-22.8941	3782.53	293.446	-27.2563	3683.41	329.151	-32.2709	3735.79
55	349.653	-16.2481	3738.99	406.054	8.72472	3921.6	388.316	-71.8046	3911.19	340.861	17.1181	3493.82	367.633	-78.8688	3566.81	336.092	-63.3202	3512.12	301.561	-20.746	3737.61	314.791	-25.6352	3636.87	350.62	-31.3475	3689.88
56	368.267	-15.1086	3706.96	428.148	10.0656	3879.69	408.352	-67.6967	3870.03	356.778	18.4333	3431.14	382.906	-77.5444	3506.35	363.34	-62.1336	3446.48	321.245	-18.6022	3687.66	335.24	-24.2084	3585	370.534	-29.5994	3639.16
57	382.999	-11.3929	3671.97	446.992	12.5523	3833.58	426.268	-63.5922	3824.31	372.26	19.2626	3366.02	397.914	-76.2293	3435.9	384.996	-55.3214	3379.29	339.479	-16.8408	3632.87	354.126	-23.0516	3527.77	388.129	-26.8267	3583.96
58	395.63	-6.83205	3630.33	463.202	15.7861	3782.28	442.611	-59.1919	3772.98	386.624	20.6449	3300.19	412.205	-74.5392	3357.89	400.014	-45.2964	3311.07	356.653	-15.3859	3572.61	370.879	-21.7221	3466.47	403.477	-23.3171	3524.23
59	409.391	-4.24916	3576.75	477.626	19.3053	3724.66	458.009	-54.0755	3714.94	399.597	22.4702	3231.54	425.297	-72.0908	3274.88	407.5	-34.594	3242.25	373.14	-14.134	3506.21	384.941	-19.698	3402.61	416.937	-19.6333	3459.23
60	427.449	-6.40603	3506.06	490.98	22.7004	3659.84	472.919	-47.9992	3649.4	411.111	24.0372	3155.97	436.602	-68.8979	3188.82	408.982	-25.055	3173.58	388.789	-12.8541	3434.07	395.991	-16.6556	3337.22	429.103	-16.3913	3388.12
61	449.956	-13.2073	3419.41	503.331	25.816	3588.09	486.989	-41.5742	3577.23	421.105	24.6966	3069.7	445.406	-65.4583	3100.77	408.946	-17.6735	3106.17	402.807	-11.1605	3357.91	404.869	-13.2337	3269.05	440.426	-13.9744	3311.04
62	472.931	-20.638	3326.61	514.551	28.5742	3510.07	499.619	-35.6712	3499.82	429.57	24.5729	2973.85	451.006	-62.2872	3011.73	411.976	-13.361	3041.06	414.377	-8.66836	3279.47	412.762	-10.3628	3196.15	450.849	-12.2302	3229.85
63	492.092	-24.3992	3238.1	524.5	30.8956	3426.48	510.246	-31.0825	3418.41	436.529	24.3478	2873.05	453.516	-59.4116	2921.25	419.534	-11.773	2975.93	423.369	-5.4131	3198.84	420.746	-8.88345	3116.77	460.066	-10.715	3146.1
64	503.967	-21.1652	3161.86	532.913	32.6887	3338.91	518.681	-27.8186	3332.88	441.989	24.6977	2771.84	454.126	-56.2149	2826.89	428.954	-10.9078	2904.05	430.555	-1.98463	3113.93	428.77	-8.73655	3030.89	467.494	-8.68016	3060.16
65	509.076	-12.401	3093.75	539.457	33.8552	3249.41	524.948	-25.4406	3242.34	445.462	25.8948	2670.98	454.078	-52.0498	2726.15	437.312	-8.68496	2818.47	436.761	0.994259	3022.52	436.138	-9.3461	2939.56	472.904	-5.89728	2970.4
66	509.163	-1.04287	3025.88	543.812	34.3072	3159.91	529.084	-23.5132	3145.96	445.969	27.8062	2567.46	453.665	-46.9428	2617.79	442.736	-4.73085	2717.34	442.329	3.1502	2923.62	442.157	-10.1343	2843.78	476.115	-2.63756	2875.22
67	505.957	10.0195	2950.61	546.1	34.2247	3069.7	531.342	-21.8252	3044.36	442.529	30.2823	2458.15	451.822	-41.8835	2502.37	444.867	-1.11241	2606.11	446.911	4.46648	2817.94	446.409	-10.6336	2743.85	476.992	0.442266	2774.14
68	500.779	19.0795	2865.8	546.896	34.0668	2975.29	532.202	-20.3996	2939.68	434.994	33.196	2342.07	447.384	-37.9199	2380.64	443.471	-0.053733	2490.71	450.105	4.95736	2706.33	448.765	-10.4912	2639.35	475.574	2.8044	2667.49
69	494.524	25.6675	2775.08	546.792	34.304	2873.08	532.15	-19.2682	2834.12	424.372	36.452	2221.26	439.722	-35.1548	2253.71	439.082	-1.94691	2374.06	451.555	4.84982	2589.68	449.107	-9.36124	2529.83	472.163	4.44277	2556.35
70	488.065	29.3721	2682.36	545.812	35.2416	2761.8	531.158	-18.2719	2728.29	411.755	39.9561	2097.96	429.028	-32.226	2123.28	433.419	-4.34449	2254.37	450.975	4.70053	2468.92	447.171	-7.08183	2415.79	467.173	5.91828	2441.6
71	482.071	30.0443	2590.45	542.893	36.8703	2644.68	528.217	-16.8877	2619.82	397.73	43.5059	1973.07	415.565	-27.6604	1991.11	428.278	-4.57254	2129.44	448.079	5.09067	2344.97	442.41	-3.84016	2299.59	460.655	7.81879	2324.14
72	476.469	28.4804	2498.2	536.854	39.1455	2525.46	522.208	-14.5525	2505.98	381.912	46.6885	1844.91	399.546	-21.1119	1857.81	423.454	-1.29977	1998.87	442.483	6.31071	2218.29	434.248	0.137485	2183.8	452.147	10.4748	2204.17
73	471.018	25.6899	2403.6	526.846	41.9771	2406.69	512.308	-10.893	2384.87	363.806	49.0669	1711.48	381.093	-14.1289	1722.12	415.39	4.54784	1865.18	433.625	8.16232	2088.61	422.337	4.60856	2069.67	440.803	13.6288	2081.53
74	465.44	22.6708	2304.57	513.234	45.1084	2286.79	498.765	-6.22658	2257.49	343.014	50.5157	1571.72	360.32	-8.42841	1582.57	400.228	11.831	1731.14	420.932	10.4025	1955.54	407.167	9.27138	1953.73	426.137	16.8931	1955.45
75	458.873	20.2353	2198.59	496.66	48.2452	2163.23	482.07	-1.02769	2125.54	319.424	51.7697	1427.03	337.061	-4.40514	1438.16	376.438	19.7124	1598.45	404.18	12.9997	1819.04	389.418	13.8107	1831.43	408.015	20.1675	1825.18
76	449.992	19.0478	2082.73	477.664	51.1494	2033.78	462.672	4.31124	1990.49	292.969	53.7109	1279.3	310.644	-0.041431	1288.64	346.746	27.9052	1466.71	383.787	16.3086	1679.57	369.676	17.9927	1698.91	386.769	23.7981	1690.01
77	437.459	19.7678	1954.04	456.059	53.99	1898.59	440.731	9.98944	1852.45	263.56	56.7192	1130.1	280.343	6.9242	1133.89	314.316	36.1819	1335.33	360.236	20.7207	1537.66	347.845	22.1715	1557.36	362.569	28.3081	1549.93
78	420.581	22.7007	1812.29	431.338	57.1149	1758.87	416.272	16.4667	1710.91	231.023	59.1659	980.03	245.213	17.0691	977.066	280.877	44.3697	1202.45	333.765	26.0901	1392.47	323.53	26.96	1410.21	335.325	33.7421	1405.54
79	400.387	27.2095	1664.35	403.026	60.8543	1615.64	389.305	24.1439	1565.28	195.157	58.9199	829.399	203.881	27.6307	827.908	245.313	52.4045	1063.72	304.118	31.2048	1240.43	296.351	32.8823	1260.76	304.692	39.4062	1258.44
80	378.186	32.5019	1518.29	371.191	65.2336	1467.19	359.503	32.4568	1413.58	156.205	54.4058	680.29	154.943	35.461	696.881	206.177	60.2327	914.553	270.985	34.7322	1077.7	266.15	39.0088	1110.28	270.417	44.2541	1109.85
81	355.083	37.8491	1381.23	336.341	70.0314	1309.58	326.274	40.0587	1252.7	116.975	47.2898	545.041	100.803	38.8885	589.655	163.518	67.3293	758.495	234.06	36.25	907.148	232.953	43.2323	958.357	233.251	47.6162	962.776
82	329.965	43.1994	1250.1	298.993	75.0126	1139	289.024	45.6022	1079.71	81.2056	40.4118	439.701	52.0807	39.426	501.543	120.608	72.1538	616.599	193.049	37.2986	746.08	196.814	43.4478	804.679	195.217	49.569	822.177
83	300.379	48.9119	1115.71	259.532	79.5749	960.876	247.636	48.8528	901.229	52.2806	36.3043	377.498	20.4415	38.997	426.517	81.1346	73.0353	512.151	147.667	39.6685	613.658	158.884	39.4179	655.172	158.494	50.5953	695.351
84	263.867	55.3473	968.809	218.145	82.58	794.146	202.688	51.2053	737.915	30.4877	34.8089	346.999	11.2264	38.6251	359.884	48.4604	68.8721	454.041	100.11	43.649	519.487	121.924	33.6391	524.908	124.614	51.0909	588.274
85	219.842	62.3259	810.317	175.006	82.8479	658.822	154.815	54.1826	611.513	14.5206	34.3819	324.084	14.9274	37.2199	300.093	25.1814	59.8981	417.352	58.3974	46.0051	450.737	88.8187	28.8234	429.676	93.9386	50.7106	500.324
86	171.444	68.593	661.276	131.21	79.8285	565.73	106.122	58.4412	532.725	3.09812	33.5514	286.142	19.9163	33.3902	246.044	13.778	46.5417	372.351	31.3709	43.0014	391.373	61.7116	26.6231	376.106	67.3312	48.7463	428.968
87	122.253	72.7669	545.119	90.3559	74.6922	500.623	62.7275	62.2717	482.071	-4.54312	31.981	232.554	18.5912	26.7504	197.423	14.2585	30.444	302.363	23.1564	33.0414	330.664	40.7095	25.7963	345.81	45.9386	44.718	367.078
88	75.8129	73.6533	481.061	56.471	68.9005	445.016	31.4314	63.5644	434.969	-8.7931	30.1521	178.545	13.6552	19.4885	155.932	20.3039	16.3501	224.13	25.8056	20.0047	271.454	25.576	24.6119	316.172	30.0329	39.5907	313.41
89	35.4051	71.4763	456.471	32.6953	63.6982	383.741	17.1375	60.6748	371.755	-10.0462	28.5447	139.213	9.43487	14.1976	123.585	24.6	9.4916	159.661	29.4696	8.63246	218.728	15.8651	21.7467	269.235	19.3202	34.8078	265.299
90	4.18789	67.1074	444.167	17.4267	59.1715	319.407	14.6047	54.4494	299.109	-8.99024	27.187	118.67	8.65628	12.487	101.284	22.1429	12.5743	123.508	27.3466	2.19626	175.885	10.0093	18.0645	211.988	11.923	31.6547	224.252
91	-14.7292	61.4112	417.176	7.4814	55.0199	260.549	15.2089	46.5653	232.492	-6.60599	25.6559	110.037	9.5756	13.2196	86.8108	14.3815	21.2483	109.408	21.1456	-0.137765	141.902	6.06704	15.1576	159.742	6.56561	29.7675	189.765
92	-20.9688	54.6605	364.175	-0.115962	50.8994	214.813	11.0308	38.601	185.905	-3.87382	23.5151	106.012	9.67513	14.7826	77.4072	3.88271	29.9423	107.493	14.0498	0.085428	114.986	2.24989	14.4319	126.371	1.99121	28.3648	162.145
93	-18.2591	46.2391	297.368	-5.99829	45.9854	179.867	2.05354	31.0255	156.941	-1.17301	20.6288	101.615	7.53915	15.8349	70.5843	-6.84136	34.5602	109.702	8.615	1.51011	93.7495	-1.51339	15.1981	109.661	-1.94718	26.3728	139.936
94	-10.6669	35.4574	230.9	-9.33041	39.1509	147.115	-6.78536	23.6127	132.908	1.95124	17.2783	95.0912	5.11474	15.8656	64.6715	-15.4452	35.5076	113.5	5.48203	3.35802	78.032	-4.21777	15.4541	97.3077	-4.23721	23.2106	119.941
95	-1.91288	22.1065	176.786	-9.29825	29.3295	108.165	-10.6041	16.1449	101.329	6.00846	13.7751	84.9333	4.98792	14.5214	58.1537	-19.6154	34.0456	117.399	4.92763	4.96068	67.906	-4.87684	13.2411	77.2005	-3.79793	18.5156	98.9841
96	6.17756	8.60468	135.387	-6.36564	17.3428	63.2289	-8.37129	8.96587	60.6455	10.7056	10.3813	70.7103	8.51249	11.702	49.8956	-17.9641	31.0805	119.587	6.73931	5.784	62.4724	-3.53257	8.46371	47.3324	-0.512333	12.7906	76.1575
97	12.4227	-1.7364	103.108	-2.44649	6.15564	22.285	-3.42438	3.0571	21.6826	14.1904	7.26313	54.0847	12.9299	8.15214	40.0284	-12.1938	26.3333	117.155	9.07198	5.74222	57.5899	-1.39377	3.14085	17.1631	3.64457	7.2635	54.1371
98	15.6733	-5.70325	76.4469	0.472741	-1.1623	-4.19874	0.672735	-0.570011	-4.10315	14.4334	4.57572	36.9595	14.625	4.79267	28.947	-4.65077	19.2785	106.969	9.74036	4.84304	48.4417	0.271245	-0.600944	-3.26166	6.40475	3.18167	35.7751
99	15.7226	-3.02011	54.9021	1.30165	-3.20029	-11.5609	1.85231	-1.56947	-11.2976	10.5471	2.44405	21.1625	11.2704	2.34531	17.3466	2.50002	10.0234	87.4856	7.34886	3.20899	32.2851	0.746849	-1.65464	-8.98069	6.41123	1.07215	22.6679
100	13.443	3.22644	41.4019	0.810223	-1.99204	-7.19614	1.15299	-0.976929	-7.0323	4.79974	0.909704	8.3143	5.24461	0.804791	7.01738	7.75603	0.987166	62.9817	3.38629	1.38205	13.951	0.464882	-1.02995	-5.5901	4.63222	0.413905	14.231
101	9.76562	9.76562	39.0625	0	0	0	0	0	0	0	0	0	0	0	0	9.76562	-4.88281	39.0625	0	0	0	0	0	0	2.44141	0.610352	9.76562

## Sheet: HORSE 10 RF
0	RFGRFZ	RFGRFZ	RFGRFZ	RFGRFZ	RFGRFZ	RFGRFZ	RFGRFZ	RFGRFZ	RFGRFZ	RFGRFZ	RFGRFZ	RFGRFZ	RFGRFZ	RFGRFZ	RFGRFZ	RFGRFZ	RFGRFZ	RFGRFZ	RFGRFZ	RFGRFZ	RFGRFZ	RFGRFZ	RFGRFZ	RFGRFZ
0	LINK_MODEL_BASED	LINK_MODEL_BASED	LINK_MODEL_BASED	LINK_MODEL_BASED	LINK_MODEL_BASED	LINK_MODEL_BASED	LINK_MODEL_BASED	LINK_MODEL_BASED	LINK_MODEL_BASED	LINK_MODEL_BASED	LINK_MODEL_BASED	LINK_MODEL_BASED	LINK_MODEL_BASED	LINK_MODEL_BASED	LINK_MODEL_BASED	LINK_MODEL_BASED	LINK_MODEL_BASED	LINK_MODEL_BASED	LINK_MODEL_BASED	LINK_MODEL_BASED	LINK_MODEL_BASED	LINK_MODEL_BASED	LINK_MODEL_BASED	LINK_MODEL_BASED
0	PROCESSED	PROCESSED	PROCESSED	PROCESSED	PROCESSED	PROCESSED	PROCESSED	PROCESSED	PROCESSED	PROCESSED	PROCESSED	PROCESSED	PROCESSED	PROCESSED	PROCESSED	PROCESSED	PROCESSED	PROCESSED	PROCESSED	PROCESSED	PROCESSED	PROCESSED	PROCESSED	PROCESSED
ITEM	X	Y	Z	X	Y	Z	X	Y	Z	X	Y	Z	X	Y	Z	X	Y	Z	X	Y	Z	X	Y	Z	X	Y	Z
1	-4.88281	-9.76562	273.438	-258.789	0	683.594	-966.797	-97.6562	322.266	-205.078	156.25	390.625	-507.812	68.3594	898.438	-219.727	0	400.391	-551.758	-4.88281	1035.16	-317.383	53.7109	625	-379.028	20.752	578.613
2	-101.945	-10.5341	344.234	-282.036	-13.1792	797.112	-942.298	-79.6155	637.815	-255.715	138.905	390.457	-487.656	47.6355	954.787	-216.594	-0.514055	619.969	-562.721	-17.7793	1071.29	-292.967	41.594	698.823	-392.742	13.314	689.311
3	-228.032	-7.24177	420.299	-276.687	-26.4918	844.522	-740.578	-35.8005	972.668	-289.648	84.8425	360.937	-384.816	13.9342	878.416	-182.727	3.90014	829.389	-480.614	-27.4676	950.495	-230.378	14.1442	713.682	-351.685	2.47742	746.301
4	-334.439	1.67781	551.244	-284.804	-28.9444	903.628	-532.644	12.3329	1199.48	-322.607	26.8953	418.198	-335.158	-0.515493	843.467	-173.781	19.3199	984.721	-410.575	-20.9232	876.613	-222.427	-16.3015	767.736	-327.054	-0.807349	818.136
5	-387.896	17.5883	755.353	-329.782	-14.4549	1025.26	-437.79	47.6833	1239.58	-356.679	-10.664	619.507	-386.017	15.7764	930.513	-211.566	47.3824	1066.35	-404.478	6.43226	960.008	-321.498	-38.8322	922.463	-354.463	8.86395	939.88
6	-395.651	41.3216	968.71	-372.38	6.58137	1169.78	-401.803	67.7591	1177.56	-358.161	-26.023	867.652	-433.565	38.8881	1060.35	-246.926	80.4141	1105.62	-402.497	41.4667	1114.99	-444.346	-47.3214	1116.27	-381.916	25.3858	1072.62
7	-371.494	73.5687	1114.64	-360.271	20.3232	1278.6	-334.173	73.1302	1132.17	-288.02	-21.0721	1041.23	-367.889	43.1179	1144.04	-223.783	109.667	1140.09	-333.243	69.1104	1233.96	-479.378	-36.6507	1261.81	-344.781	41.3993	1168.32
8	-327.438	110.249	1165.79	-271.754	17.884	1322.74	-187.251	65.2102	1186.09	-148.365	-3.17989	1092.03	-212.082	28.4964	1182.76	-147.095	129.36	1200.04	-201.228	83.1666	1293.12	-368.931	-6.75944	1309.67	-233.018	53.0534	1219.03
9	-272.371	138.876	1181.65	-171.559	4.36082	1356.67	-34.3429	47.7938	1320.24	-13.7846	10.6327	1100.79	-93.0903	15.1461	1248.03	-92.3899	137.144	1307.39	-98.7148	87.6967	1365.58	-207.554	28.1393	1317.43	-122.976	58.7237	1274.72
10	-215.057	146.512	1229.48	-139.415	-12.7051	1449.37	30.2194	25.0942	1497.69	35.4673	2.87526	1159.69	-114.456	19.3112	1397.56	-131.69	131.491	1479.96	-113.785	87.151	1522.24	-116.273	51.3576	1361.32	-95.6238	56.3859	1387.16
11	-170.738	133.565	1340.28	-214.566	-27.2345	1634.32	-40.2134	1.69966	1687.46	-24.3408	-27.0011	1305.2	-234.676	32.7732	1602.09	-250.581	118.227	1693.06	-229.131	83.8544	1745.81	-163.295	53.6443	1486.23	-165.942	46.191	1561.81
12	-162.465	116.531	1501.38	-339.726	-36.6335	1860.37	-178.613	-16.9068	1872.65	-148.82	-59.1273	1506.67	-362.381	38.9174	1802.49	-378.878	107.922	1894.66	-359.445	78.7613	1962.1	-290.888	43.4774	1662.47	-277.652	34.1177	1757.85
13	-211.55	112.01	1696.96	-443.738	-38.8306	2064.22	-301.608	-25.1344	2038.47	-290.214	-73.3796	1729.81	-435.216	29.3883	1959.31	-456.03	109.083	2041.57	-431.589	72.8356	2109.32	-423.132	31.8972	1849.53	-374.135	27.2337	1936.15
14	-302.281	122.263	1902.29	-484.47	-33.7275	2209.2	-358.884	-20.5696	2176.64	-412.299	-65.7722	1946.37	-457.656	14.8449	2078.42	-480.57	118.249	2142.91	-446.838	67.2236	2200.38	-508.431	26.5924	2017.42	-431.428	28.638	2084.2
15	-388.225	137.657	2085.26	-478.488	-25.2162	2312.45	-366.979	-7.22427	2292.03	-488.427	-45.7095	2133.09	-443.798	8.19188	2172.17	-471.57	127.798	2225.97	-432.331	63.1345	2274.17	-544.391	28.474	2157.5	-451.776	35.8882	2206.58
16	-426.583	149.029	2217.26	-449.401	-17.6498	2397.55	-350.45	10.1237	2391.14	-496.393	-22.5239	2269.91	-414.062	12.0924	2256.25	-447.87	132.629	2312.61	-411.452	61.1216	2360.45	-534.66	37.6109	2263.81	-441.359	45.3042	2308.62
17	-419.383	155.376	2306.32	-417.36	-13.7246	2482.7	-329.794	27.4545	2482.35	-454.841	-0.852583	2366.35	-395.428	18.6007	2349.73	-427.572	134.908	2409.05	-396.71	59.8519	2462.67	-491.49	52.0846	2340.57	-416.572	54.2122	2399.97
18	-394.095	160.325	2381.32	-396.567	-13.2836	2576.91	-318.526	42.0534	2577.35	-405.599	17.3314	2448.76	-410.858	20.405	2468.64	-428.414	138.062	2518.61	-398.512	57.6828	2579.54	-441.952	66.5534	2409.49	-399.315	61.1412	2495.08
19	-375.476	166.94	2467.9	-400.395	-15.8802	2688.09	-329.239	51.38	2687.96	-384.883	30.421	2540.61	-449.707	18.9575	2603.87	-454.105	143.453	2639.32	-417.888	54.6032	2706.77	-414.245	75.418	2493.77	-403.242	65.6615	2603.54
20	-369.726	174.458	2570.53	-429.565	-20.6741	2816.42	-362.586	55.2717	2816.39	-392.651	38.8763	2646.46	-485.566	19.8194	2734.54	-486.615	149.231	2760.98	-441.343	53.1325	2835.43	-418.913	77.3103	2603.1	-423.371	68.4282	2722.98
21	-375.977	180.664	2685.55	-466.187	-26.2463	2950.6	-401.653	57.0636	2950.77	-415.039	43.9453	2763.67	-500.022	26.3497	2846.43	-506.925	153.359	2873.2	-454.8	55.8591	2956.61	-440.527	77.0869	2727.37	-445.141	71.0101	2844.28
22	-392.175	183.945	2808.76	-491.217	-31.1544	3078.62	-428.446	60.2978	3078.28	-439.786	46.7882	2888.64	-500.045	34.9153	2946.57	-511.905	155.369	2975.01	-456.26	62.7148	3069.16	-461.824	79.9907	2854.99	-460.207	74.1082	2962.5
23	-411.59	185.123	2933.77	-497.938	-34.8052	3195.25	-436.847	65.8643	3193.97	-461.144	48.2065	3013.93	-497.456	40.5956	3046	-512.165	156.149	3073.52	-454.166	71.3333	3178.64	-474.413	87.219	2978.48	-468.215	77.4608	3076.69
24	-426.33	185.632	3053.66	-495.149	-37.6744	3303.83	-435.7	71.3136	3302.72	-475.001	48.9118	3131.18	-498.495	42.0883	3150.11	-517.387	156.543	3175.15	-456.301	79.4793	3289.91	-481.077	94.8732	3095.57	-473.18	80.1458	3187.77
25	-431.646	186.301	3164.14	-492.426	-40.2839	3408.14	-434.567	74.0714	3409.93	-479.551	49.3585	3236.2	-501.736	43.0669	3256.51	-526.258	156.657	3278.61	-462.488	86.5617	3400.83	-485.25	98.8636	3204.44	-476.74	81.8245	3294.85
26	-431.049	186.39	3267.84	-493.683	-42.5784	3509.74	-436.846	73.909	3517.45	-479.056	49.3265	3335.74	-505.243	47.1682	3362.27	-532.227	156.25	3378.91	-468.75	92.7734	3505.86	-488.793	98.6482	3306.79	-479.456	82.7359	3398.07
27	-429.362	184.912	3368.5	-496.718	-43.8793	3607.75	-439.279	73.1299	3623.28	-478.723	48.4901	3438.25	-507.628	53.5423	3464.84	-530.528	155.127	3472.14	-471.816	98.099	3601.3	-491.863	97.5154	3408.1	-480.74	83.367	3498.02
28	-429.278	181.654	3468.41	-499.064	-43.5509	3701.26	-438.39	74.043	3725.32	-480.962	46.8402	3546.56	-507.846	58.5137	3561.93	-523.682	153.279	3558.91	-471.335	101.669	3690.78	-494.493	98.7894	3513.73	-480.631	83.9048	3595.86
29	-429.737	177.777	3567.26	-499.044	-42.4524	3791.05	-433.043	76.5307	3822.99	-483.242	44.9254	3653.54	-505.051	59.2316	3652.07	-516.02	150.748	3640.96	-467.683	102.406	3779.76	-495.944	102.68	3622.78	-478.72	83.9806	3691.3
30	-429.31	174.536	3664.47	-495.713	-42.8268	3879.45	-424.27	78.2281	3917.13	-482.583	43.3323	3751.2	-499.219	56.6134	3737.54	-510.223	147.585	3719.74	-461.051	99.9675	3870.47	-494.762	106.512	3728.55	-474.641	82.9934	3783.57
31	-427.051	171.901	3759.06	-488.237	-46.7992	3968.66	-413.155	76.8625	4008.56	-477.573	42.0225	3836.8	-490.554	52.5932	3821.57	-505.518	143.872	3796.15	-451.245	95.559	3958.33	-489.559	107.66	3824.47	-467.862	80.4588	3871.7
32	-422.591	168.283	3849.56	-477.107	-53.8303	4057.45	-400.347	72.9343	4096.87	-468.702	40.2045	3913.89	-479.267	48.6045	3904.74	-500.699	139.685	3870.99	-438.053	90.5727	4038.02	-480.397	105.991	3909.57	-458.395	76.5555	3955.14
33	-415.612	162.106	3934.56	-463.867	-61.2646	4141.9	-386.148	69.1458	4180.72	-456.572	37.1141	3986.31	-465.585	45.1611	3982.75	-494.713	134.897	3943.64	-422.243	86.2036	4107.79	-468.491	103.348	3987.32	-446.654	72.089	4033.12
34	-406.116	153.536	4014.25	-449.983	-66.5335	4218.3	-370.839	68.0587	4258.78	-441.797	33.1991	4055.76	-449.742	42.6917	4051.04	-486.681	129.148	4011.85	-405.718	83.4189	4169.97	-455.028	101.537	4061.11	-433.238	68.132	4105.13
35	-394.361	144.185	4090.13	-435.604	-68.8806	4286.34	-354.546	69.721	4330.53	-425.003	29.9127	4122.2	-432.04	41.8519	4109.75	-475.804	122.083	4073.57	-390.24	83.071	4227.03	-440.466	101.173	4132.03	-418.508	65.3896	4171.45
36	-380.631	135.537	4163.53	-419.982	-68.7815	4348.01	-337.288	72.4722	4396	-406.819	28.6441	4185.5	-412.845	43.4878	4162.93	-462.123	113.591	4129.8	-375.208	84.8232	4280.33	-424.764	102.067	4199.59	-402.458	63.9801	4233.21
37	-365.359	127.387	4233.54	-402.417	-66.8153	4405.13	-319.061	74.7508	4455.16	-387.895	29.8528	4244.91	-392.459	48.1076	4213.99	-446.215	103.719	4183.51	-358.499	87.5722	4330.53	-407.883	104.029	4263.22	-384.973	63.5754	4291.25
38	-349.061	118.57	4298.01	-382.86	-64.3738	4457.19	-299.633	76.3288	4507.33	-368.893	33.4705	4299.33	-370.814	54.1457	4261.68	-428.587	92.5315	4236.55	-338.35	90.2631	4377.89	-389.871	107.037	4321.75	-366.009	63.4966	4344.97
39	-332.088	108.091	4354.96	-361.643	-63.3203	4502.31	-278.643	77.7523	4551.45	-350.195	39.1745	4347.75	-347.708	59.2663	4303.03	-409.284	80.177	4284.21	-315.171	92.1861	4420.73	-370.83	111.163	4373.67	-345.695	63.0612	4392.26
40	-313.751	96.0591	4403.54	-339.117	-65.2193	4538.82	-255.776	79.4963	4586.68	-330.443	45.1077	4389.44	-323.106	62.0188	4336.28	-388.189	66.8335	4319.5	-290.13	92.7511	4456.71	-350.827	116.384	4417.74	-323.917	61.6788	4431.09
41	-292.969	83.0078	4443.36	-315.785	-69.1102	4566.76	-231.116	81.3649	4614.01	-307.617	48.8281	4423.83	-297.398	63.1536	4362.81	-365.185	52.7765	4338.98	-264.177	91.6719	4484.13	-329.646	121.861	4454.84	-300.487	59.1942	4461.09
42	-269.056	69.4309	4474.28	-292.224	-72.7836	4587	-204.948	82.8308	4635.38	-280.432	48.685	4450.57	-271.032	63.7312	4384.4	-340.148	38.5617	4349.37	-237.638	89.5354	4503.26	-306.929	126.355	4486.9	-275.301	55.7934	4483.9
43	-242.916	55.6663	4497.3	-268.819	-74.3438	4600.42	-177.565	83.4519	4652.33	-250.55	46.1958	4470.33	-244.186	64.0825	4401.37	-312.966	24.7923	4359.13	-210.724	87.0822	4514.72	-282.37	128.768	4515.55	-248.762	51.9619	4501.4
44	-215.852	42.0126	4513.7	-244.633	-74.1064	4607.71	-149.317	83.3869	4663.9	-220.369	43.6684	4484.04	-216.742	63.7284	4412.43	-284.307	11.8957	4371.58	-183.319	84.9081	4518.85	-256.001	128.976	4540.07	-221.318	48.0587	4514.04
45	-188.755	28.578	4524.52	-218.175	-73.3141	4609.5	-120.583	83.0468	4668.06	-191.374	42.7139	4492.25	-188.581	62.2569	4416.32	-256.051	0.027401	4382.1	-154.804	83.3843	4515.58	-228.002	127.267	4558.8	-193.291	44.245	4520.89
46	-161.442	14.9703	4530.18	-188.345	-73.0172	4606.47	-91.6215	82.8001	4663.46	-162.659	43.1145	4494.52	-159.717	60.1921	4413.15	-230.058	-10.7168	4385.58	-124.566	82.8303	4504.87	-198.622	124.038	4570.28	-164.629	40.5264	4521.06
47	-133.556	0.720061	4531.01	-156.287	-73.1491	4599.71	-62.0292	82.7686	4652.62	-132.939	44.3568	4490.28	-130.227	58.5308	4403.63	-205.969	-20.8906	4380.55	-92.8797	82.9828	4488.06	-168.511	120.308	4574.21	-135.3	36.9534	4515.01
48	-104.907	-14.3684	4527.21	-123.941	-73.2474	4590.44	-31.1656	82.9865	4639.44	-101.886	46.0162	4479.63	-100.14	57.9785	4388.65	-181.505	-31.6096	4368.64	-60.7894	83.0746	4467.66	-138.467	117.314	4570.74	-105.35	33.5181	4504.05
49	-75.593	-30.0079	4518.71	-92.9043	-72.9974	4579.27	1.21706	83.407	4626.67	-70.8514	47.8248	4463.88	-69.3102	58.2359	4369.49	-154.655	-43.7879	4351.55	-29.3186	82.4941	4445.86	-109.026	116.035	4560.15	-75.0552	30.1504	4489.45
50	-45.7569	-45.861	4505.44	-63.1536	-72.7937	4563.86	33.4928	83.5969	4611.6	-41.3232	49.537	4444.41	-37.5698	58.7909	4347.5	-126.068	-56.593	4330.54	0.872394	82.0008	4422.12	-79.4986	116.205	4543.35	-44.8757	26.8603	4471.1
51	-15.9599	-61.5705	4487.36	-34.1797	-73.2422	4541.02	63.4766	83.0078	4589.84	-13.6859	51.1326	4422	-5.64076	59.1615	4323.42	-97.6562	-68.3594	4306.64	29.2969	83.0078	4394.53	-48.8281	117.188	4521.48	-15.3972	23.7906	4448.29
52	12.7297	-76.7554	4464.44	-5.57447	-74.7128	4508.85	89.738	81.3507	4558.5	13.0081	52.8623	4396.59	24.4447	58.9103	4297	-70.8129	-77.9362	4280.66	55.8246	86.1099	4361.91	-16.7062	118.479	4496.25	12.8314	21.0385	4420.52
53	39.3103	-91.0639	4436.66	22.6668	-76.6324	4470.72	113.864	79.3741	4520.45	39.7514	54.9597	4368.08	50.7561	57.6581	4267.96	-44.8263	-86.2515	4252.38	81.7453	88.6117	4325.84	14.1849	120.102	4471.64	39.6816	18.3448	4389.22
54	64.4039	-104.663	4404.1	50.4479	-78.1924	4431.32	138.198	78.0863	4480.06	66.9624	57.0923	4335.82	73.946	55.702	4236.07	-18.4633	-94.7477	4221.36	108.697	87.01	4288.61	40.4153	122.21	4452.21	65.5759	15.3122	4356.19
55	89.9793	-118.151	4366.92	77.6671	-78.8082	4393.61	164.335	78.0623	4440.05	94.5826	58.4584	4298.74	96.4148	53.7975	4201.19	8.64685	-104.026	4186.69	137.238	80.1687	4250.46	60.3713	124.704	4439.14	91.1543	11.7757	4322.1
56	117.808	-132.053	4325.21	104.204	-78.6488	4354.79	191.374	78.4255	4397.74	122.499	58.3211	4255.94	120.228	52.4401	4162.89	35.0646	-112.921	4146.52	165.66	71.9156	4207.4	78.5317	126.629	4422.36	116.921	8.01347	4284.11
57	147.318	-146.049	4278.65	129.935	-78.0409	4310.84	217.89	77.995	4349.33	150.203	56.7194	4208.31	145.719	50.8629	4119.5	59.1864	-120.088	4098.93	192.03	66.5889	4155.04	100.649	126.855	4389.42	142.866	4.35541	4238.75
58	176.609	-159.339	4226.66	154.901	-77.387	4259.2	243.035	75.9245	4292.83	176.961	54.1326	4157.74	172.706	47.9326	4068.99	81.3456	-125.4	4044.19	216.292	65.0611	4093.16	130.072	124.458	4333.78	168.99	0.672855	4184.57
59	204.033	-171.213	4168.93	179.614	-77.3034	4201.28	267.579	72.3103	4231.31	202.17	51.0086	4105.8	200.529	43.1242	4010.7	104.114	-130.145	3985.04	240.552	64.1973	4026.4	163.367	119.102	4265.51	195.245	-3.61475	4124.37
60	229.59	-181.544	4106.98	204.666	-78.443	4139.23	292.575	67.4146	4168.74	226.023	47.568	4051.78	227.57	37.1166	3946.69	129.874	-135.552	3924.16	266.79	60.9113	3959.21	195.92	110.557	4197.58	221.626	-8.99648	4061.8
61	253.906	-190.43	4042.97	230.196	-81.1121	4074.62	318.353	61.7744	4107.27	249.023	43.9453	3994.14	252.179	30.73	3879.23	157.366	-141.302	3861.79	294.086	55.276	3890.86	224.677	99.5155	4137.54	247.473	-15.2004	3998.55
62	277.406	-198.02	3978.2	255.263	-84.7921	4007.73	343.519	56.5809	4044.63	271.586	40.2914	3931.45	274.154	24.7872	3808.62	182.976	-146.073	3796.55	319.654	49.4023	3817.27	250.308	88.8743	4080.02	271.858	-21.1186	3933.06
63	299.695	-204.678	3910.46	278.773	-88.844	3938.62	366.434	53.1138	3977.93	293.781	36.8245	3862.86	294.601	20.1135	3733.43	203.756	-148.829	3727.22	341.103	45.0528	3735.2	274.025	81.8367	4017.76	294.021	-25.6763	3862.93
64	320.176	-210.823	3836.62	300.07	-92.7024	3866.59	386.24	51.6628	3904.67	315.591	33.7794	3787.65	314.424	17.3402	3652.37	220.679	-150.236	3653.41	358.444	41.8509	3646.35	296.596	79.5766	3946.44	314.028	-28.6938	3786.76
65	338.523	-216.64	3755.02	319.393	-95.9494	3789.4	403.668	50.5158	3823.15	336.586	31.378	3705.75	332.885	15.8273	3565.55	236.084	-151.547	3575.05	372.523	38.6767	3554.15	317.894	79.164	3867.58	332.195	-31.0718	3704.46
66	355.13	-221.718	3667.78	337.084	-98.1867	3704.61	419.632	47.7354	3731.8	355.247	29.8082	3618.81	348.591	14.4239	3473.63	251.723	-153.516	3491.83	384.177	34.8865	3460.92	337.68	77.1984	3783.42	348.658	-33.671	3616.6
67	370.507	-225.549	3577.59	353.269	-99.1314	3611.61	434.422	42.7188	3631.2	369.896	29.2476	3528.74	360.84	12.4553	3376.85	267.656	-155.45	3402.85	394.209	31.2075	3365.86	355.708	72.2928	3695.63	363.313	-36.526	3523.79
68	384.922	-227.923	3485.3	367.703	-98.6995	3512.89	447.256	37.1608	3525.7	380.024	29.4859	3436.14	370.791	10.5285	3274.21	283.632	-156.402	3307.14	403.406	28.5975	3267.57	371.71	66.5268	3604.9	376.18	-38.8407	3426.73
69	398.234	-229.157	3388.49	380.103	-96.832	3411.17	457.257	32.9612	3419.92	387.185	29.6289	3339.27	379.875	9.44359	3164.55	298.984	-155.711	3204.57	411.773	27.135	3163.93	385.422	62.2933	3511.83	387.354	-40.0298	3325.47
70	410.244	-229.602	3284.45	390.153	-93.7464	3306.57	464.01	30.8499	3314.49	393.118	28.7406	3236.21	388.22	9.36343	3047.72	312.4	-153.152	3096.4	418.104	25.5355	3051.63	396.742	60.4198	3415.85	396.624	-40.199	3219.16
71	420.394	-229.032	3172	397.49	-90.0673	3195.26	467.787	29.8358	3204.2	398.647	26.8061	3126.28	394.404	9.69065	2924.76	322.556	-148.555	2983.89	421.136	22.4917	2927.48	405.81	59.4309	3314.76	403.528	-39.9249	3106.08
72	427.688	-226.52	3051.77	401.758	-86.4409	3073.24	468.905	28.8065	3083.48	403.492	24.9199	3010.31	397.02	9.84198	2796.7	328.961	-142.012	2866.75	420.453	18.3905	2792.12	412.779	57.6955	3206.25	407.632	-39.4147	2985.08
73	431.154	-221.161	2924.48	403.009	-83.1259	2940.11	467.367	27.2492	2950.95	407.268	24.1706	2889.13	395.655	9.78085	2663.71	331.844	-133.84	2743.3	416.373	15.0841	2649.47	417.581	54.6045	3089.81	408.781	-38.4047	2856.37
74	430.612	-213.068	2790.33	401.811	-79.8927	2800.04	462.785	25.4063	2810.5	408.913	24.4305	2762.21	390.434	9.7682	2525.49	331.464	-124.36	2612.2	409.205	14.1592	2503.11	419.861	50.8369	2967.18	406.886	-36.59	2721.38
75	426.544	-203.202	2649.11	398.739	-76.4916	2657.4	454.753	23.5625	2666.24	406.798	24.563	2627.88	381.645	9.94562	2381.81	328.151	-113.844	2474.84	399.013	14.7114	2352.97	419.26	47.1365	2840.15	401.863	-34.2023	2581.3
76	419.438	-192.46	2500.74	393.684	-72.9711	2513.43	443.142	21.8537	2519.43	399.494	23.5322	2484.72	370.141	10.0033	2232.69	322.266	-102.539	2333.98	385.742	14.6484	2197.26	415.666	43.7891	2708.34	393.697	-31.7679	2436.33
77	409.643	-180.875	2346.95	385.8	-69.7013	2366.08	428.12	20.255	2368.2	387.685	21.593	2334.4	356.895	9.53779	2078.25	314.055	-90.6608	2191.73	369.325	12.6201	2035.02	409.234	40.5862	2569	382.595	-29.5807	2286.2
78	397.433	-167.99	2190.4	374.242	-67.0271	2213.2	409.884	18.7301	2210.61	373.258	19.7326	2180.32	342.119	8.80318	1919.61	303.302	-78.2904	2047.63	349.655	10.2745	1868.59	400.122	37.3046	2419.45	368.752	-27.3078	2131.23
79	383.017	-153.347	2033.2	358.915	-64.4628	2054.88	388.96	17.1806	2046.5	357.814	18.8102	2025.6	324.816	9.09799	1759.55	289.68	-65.4748	1900.62	326.615	9.99869	1701.13	388.251	33.9224	2260.93	352.258	-24.2844	1972.8
80	366.21	-136.542	1873.74	340.421	-60.7537	1893.21	366.173	15.4504	1877.38	341.125	18.8439	1871.54	303.948	11.6704	1600.75	273.653	-52.1162	1750.4	300.279	12.4609	1534.07	373.32	30.6044	2098.27	333.141	-20.0478	1812.42
81	346.68	-117.188	1708.98	319.349	-54.7036	1730.3	342.215	13.4482	1704.74	322.266	19.5312	1718.75	279.332	15.8005	1442.72	257.345	-37.813	1598.35	271.125	14.7246	1365.16	355.069	27.5009	1936.16	311.672	-14.8373	1650.65
82	323.907	-95.5045	1537.56	295.703	-46.4877	1567.35	315.447	12.134	1529.51	300.345	20.4464	1567.17	251.417	19.3369	1282.68	242.966	-22.177	1446.04	239.666	13.5123	1192.05	333.964	24.4298	1774.95	287.927	-9.28874	1487.16
83	296.626	-74.1533	1364.72	269.02	-37.3704	1404.83	282.387	13.3027	1352.11	274.625	20.6729	1414.14	220.7	20.5606	1120.41	228.904	-6.38102	1294.42	205.899	8.97243	1023.05	311.053	20.9449	1611.54	261.152	-4.18139	1323.15
84	263.389	-56.4	1197.4	238.853	-28.6197	1243.61	240.052	18.473	1173.74	244.406	19.1731	1256.35	187.865	20.1231	968.991	209.136	6.59758	1143.73	169.228	5.21378	878.764	287.12	16.7394	1443.32	230.006	0.162533	1163.24
85	224.312	-44.3632	1042.79	205.089	-21.1755	1089.86	192.358	25.4247	1005.21	209.772	15.6466	1096.29	153.671	19.4252	845.7	178.217	13.9464	995.005	129.625	6.06926	778.208	259.476	13.338	1275.22	194.065	3.53893	1016.04
86	183.611	-37.1478	908.769	167.848	-15.7543	953.388	147.909	29.3961	863.911	172.865	11.7271	951.716	121.126	18.8812	758.032	140.298	15.9432	858.741	94.0586	9.59901	713.757	223.075	13.5108	1117.27	156.349	5.76941	890.698
87	146.164	-33.3702	803.245	127.85	-12.9862	842.878	114.881	26.1377	765.009	136.181	9.34288	842.689	98.0495	16.8021	692.632	105.721	14.859	751.572	74.0099	10.1389	660.597	174.118	19.4618	978.972	122.122	6.29825	792.199
88	116.302	-31.6056	725.889	91.8809	-12.6705	755.294	96.2043	17.0722	700.242	103.788	8.75264	773.996	92.3738	11.351	633.881	83.3913	12.8099	685.216	77.7055	3.3674	597.826	121.911	27.43	863.556	97.9447	4.56336	716.987
89	97.3968	-30.3573	661.87	70.2461	-14.124	680.774	91.7652	6.91595	647.729	82.5304	7.27406	723.549	101.24	3.33421	575.087	73.6015	10.8576	643.31	94.7373	-7.17717	528.022	83.367	30.1909	770.608	86.8606	0.864286	653.869
90	92.543	-28.1555	595.22	71.4026	-16.6036	610.288	100.563	-0.044373	587.698	79.2649	2.02954	667.027	111.371	-3.88957	518.179	73.6483	9.69706	599.741	108.225	-15.2263	461.919	72.9674	21.69	698.912	88.7481	-3.81283	592.373
91	98.8893	-24.6675	521.154	88.1258	-18.9212	542.353	114.56	-3.41894	519.263	91.9538	-6.41843	596.836	110.84	-7.2991	465.058	79.9709	9.64067	538.143	106.677	-16.6122	406.229	84.261	5.92447	640.996	96.9098	-7.72154	528.754
92	106.42	-20.9312	448.369	105.438	-19.6685	479.221	122.24	-4.74474	450.875	107.839	-13.3615	525.535	100.417	-7.02228	414.916	86.5505	9.90136	470.223	94.1266	-13.2188	356.069	100.446	-8.13863	586.29	102.935	-9.64804	466.437
93	105.198	-18.0166	385.784	110.266	-17.7274	422.391	114.017	-5.40071	389.568	114.134	-14.1316	466.062	86.3911	-4.55614	365.768	87.0018	9.5048	412.498	77.3406	-8.00057	304.545	106.738	-12.8666	525.532	100.136	-8.89935	409.019
94	93.7922	-16.1686	332.591	102.98	-13.9788	368.032	93.7165	-5.58808	332.208	108.325	-8.88367	417.575	73.3838	-1.15844	315.345	79.2944	8.02814	369.314	60.79	-3.27585	248.606	102.689	-10.0193	458.561	89.3714	-6.38057	355.279
95	77.8252	-14.9469	279.908	89.5879	-10.1427	310.072	70.7898	-5.01406	271.397	96.4185	-1.77446	367.792	61.1223	2.62362	260.567	68.148	5.90317	326.142	45.3842	-0.376491	191.148	93.8661	-5.29658	389.036	75.3927	-3.62806	299.508
96	62.6824	-13.8865	219.736	75.3105	-7.64438	244.07	53.2438	-3.50707	201.935	84.1249	3.22974	305.406	48.4769	6.36151	198.377	58.6029	3.6302	267.724	31.7194	-0.442973	135.605	84.8526	-3.49008	320.004	62.3767	-1.96869	236.607
97	49.311	-12.4797	155.142	60.7651	-6.2111	174.928	40.7319	-1.59691	131.262	71.7031	5.2232	232.085	35.3384	9.26956	132.053	51.0257	1.61908	194.822	20.261	-2.70044	85.8441	74.5106	-4.13056	250.938	50.4559	-1.37586	169.634
98	36.1385	-10.1947	95.4652	44.938	-4.96866	110.857	29.9482	-0.061966	71.2984	56.318	5.03756	156.856	22.9033	10.1049	72.9914	41.7408	0.201364	122.057	11.3609	-4.71737	46.1046	59.6742	-4.88481	180.047	37.8777	-1.18546	106.959
99	22.0554	-6.69549	49.0396	27.4815	-3.25059	59.0498	18.4062	0.499176	31.5136	36.08	3.5265	88.5387	12.407	7.81543	32.0858	27.6956	-0.355398	63.2887	5.2907	-4.34867	19.9907	38.6001	-3.9261	107.552	23.5021	-0.841892	56.3824
100	8.98342	-2.85335	17.516	11.2379	-1.38584	21.8133	7.55123	0.347453	9.66071	15.1512	1.55675	34.1458	4.61136	3.60528	9.69385	11.843	-0.271527	22.7323	1.71298	-2.15784	5.95636	16.3468	-1.85603	43.2991	9.67973	-0.376888	20.6022
101	0	0	0	0	0	0	0	0	0	0	0	0	0	0	0	0	0	0	0	0	0	0	0	0	0	0	0

## Sheet: HORSE 10 LH
0	LHGRFZ	LHGRFZ	LHGRFZ	LHGRFZ	LHGRFZ	LHGRFZ	LHGRFZ	LHGRFZ	LHGRFZ	LHGRFZ	LHGRFZ	LHGRFZ	LHGRFZ	LHGRFZ	LHGRFZ	LHGRFZ	LHGRFZ	LHGRFZ	LHGRFZ	LHGRFZ	LHGRFZ	LHGRFZ	LHGRFZ	LHGRFZ
0	LINK_MODEL_BASED	LINK_MODEL_BASED	LINK_MODEL_BASED	LINK_MODEL_BASED	LINK_MODEL_BASED	LINK_MODEL_BASED	LINK_MODEL_BASED	LINK_MODEL_BASED	LINK_MODEL_BASED	LINK_MODEL_BASED	LINK_MODEL_BASED	LINK_MODEL_BASED	LINK_MODEL_BASED	LINK_MODEL_BASED	LINK_MODEL_BASED	LINK_MODEL_BASED	LINK_MODEL_BASED	LINK_MODEL_BASED	LINK_MODEL_BASED	LINK_MODEL_BASED	LINK_MODEL_BASED	LINK_MODEL_BASED	LINK_MODEL_BASED	LINK_MODEL_BASED
0	PROCESSED	PROCESSED	PROCESSED	PROCESSED	PROCESSED	PROCESSED	PROCESSED	PROCESSED	PROCESSED	PROCESSED	PROCESSED	PROCESSED	PROCESSED	PROCESSED	PROCESSED	PROCESSED	PROCESSED	PROCESSED	PROCESSED	PROCESSED	PROCESSED	PROCESSED	PROCESSED	PROCESSED
ITEM	X	Y	Z	X	Y	Z	X	Y	Z	X	Y	Z	X	Y	Z	X	Y	Z	X	Y	Z	X	Y	Z	X	Y	Z
1	-39.0625	-24.4141	29.2969	-156.25	34.1797	634.766	9.76562	24.4141	78.125	-19.5312	4.88281	29.2969	-14.6484	19.5312	97.6562	24.4141	-9.76562	136.719	4.88281	14.6484	78.125	-268.555	19.5312	498.047	-57.373	10.376	197.754
2	-94.2715	3.99683	178.494	-238.972	38.6536	700.688	-44.131	28.6771	167.653	-105.042	6.97639	206.103	-48.7425	20.1983	97.865	-77.7304	-16.6299	249.93	-64.293	16.7135	159.249	-294.858	20.0865	600.281	-121.005	14.8341	295.033
3	-164.356	41.0196	370.605	-310.917	38.3988	694.846	-109.837	30.9873	276.408	-216.639	8.74328	433.337	-102.066	17.7176	114.724	-201.253	-23.7652	376.574	-147.307	16.5895	265.422	-284.699	17.797	669.257	-192.134	18.436	400.147
4	-234.635	66.345	545.32	-343.038	35.1497	681.191	-153.924	33.696	379.401	-321.124	9.72175	634.737	-173.354	14.7196	200.832	-277.475	-29.1807	485.582	-202.267	14.931	385.065	-259.485	15.0752	741.298	-245.663	20.0572	506.678
5	-290.827	62.6328	650.338	-312.009	30.5629	717.034	-150.407	38.5018	457.833	-389.152	9.62324	747.896	-257.288	13.3347	389.563	-258.362	-31.38	555.701	-196.753	12.4568	508.219	-238.88	14.1052	848.175	-261.71	18.7297	609.345
6	-321.874	36.3977	697.692	-240.469	25.6719	806.305	-116.775	43.2934	529.053	-413.854	9.17057	791.314	-330.792	13.5042	630.077	-186.321	-31.0344	608.698	-153.656	10.2581	634.385	-228.531	15.2377	985.094	-249.034	15.3124	710.327
7	-318.267	5.64434	730.403	-173.198	21.2099	927.224	-86.2553	44.5804	623.491	-396.501	9.45264	812.774	-365.931	14.5696	848.48	-128.516	-29.4086	678.118	-115.884	9.5614	766.486	-227.337	17.9402	1129.65	-226.486	11.6937	814.578
8	-271.76	-12.3001	790	-153.029	17.8798	1058.39	-88.3597	39.393	766.835	-340.46	11.4108	856.208	-343.914	15.964	987.02	-137.022	-27.4597	789.388	-121.312	11.3859	906.559	-234.106	21.6584	1260.22	-211.245	9.74151	926.827
9	-197.304	-14.0051	886.707	-184.133	15.8625	1188.35	-120.086	29.3084	943.316	-267.257	14.6981	931.684	-289.844	17.5589	1065.42	-191.488	-24.6681	928.988	-163.758	14.9472	1048.89	-246.772	25.5353	1371.79	-207.58	9.90464	1045.64
10	-130.289	-8.28843	1003.16	-236.612	14.8781	1314.45	-161.691	18.2455	1115.82	-207.768	18.3042	1031.83	-241.979	19.3575	1126.62	-249.86	-20.0718	1071.72	-214.35	18.532	1183.79	-262.497	28.4471	1473.97	-213.131	11.1755	1165.17
11	-106.443	-4.30776	1121.19	-279.638	14.6307	1434.36	-194.343	9.91289	1249.58	-190.698	21.2582	1149.12	-231.174	21.3116	1207.26	-277.587	-13.0209	1196.86	-245.737	20.5246	1302.35	-278.439	29.2762	1576.79	-225.507	12.4482	1279.69
12	-137.755	-6.08454	1231.28	-297.756	14.7779	1547.88	-213.489	4.90473	1344.03	-214.234	23.2027	1275.64	-249.332	23.1027	1310.88	-279.611	-4.50776	1307.08	-253.692	20.7328	1407.18	-292.928	27.8896	1685.82	-242.35	13.0023	1388.72
13	-198.349	-9.44649	1337.79	-300.036	14.904	1658.14	-224.86	1.57058	1423.25	-254.566	24.222	1403.21	-275.59	24.3243	1430.15	-273.812	3.93734	1412.78	-250.658	19.9908	1509.14	-306.174	25.7251	1799.48	-260.506	13.1534	1496.74
14	-258.967	-9.48986	1446.29	-297.74	14.5867	1768.61	-234.27	-1.75454	1511.2	-288.043	24.4215	1523.92	-292.147	24.68	1557.96	-275.46	10.9451	1522.73	-249.117	19.142	1618.89	-318.553	24.3604	1915.58	-276.787	13.3614	1608.15
15	-298.446	-3.13225	1560.24	-299.271	13.549	1881.76	-244.16	-5.92965	1616.46	-305.873	24.168	1635.55	-298.918	24.5123	1688.64	-284.692	16.078	1636.55	-253.981	18.7216	1738.17	-330.083	24.8484	2031.71	-289.428	14.1019	1723.63
16	-319.898	7.2456	1676.83	-304.461	11.9488	1997.16	-253.598	-11.0079	1732.25	-314.117	24.0898	1741.57	-302.159	24.3923	1817.01	-296.232	19.2324	1750.53	-262.594	18.9566	1859.77	-339.701	26.6672	2144.97	-299.095	15.1906	1840.01
17	-330.965	18.2429	1792.08	-311.54	10.025	2113.81	-261.519	-17	1851.15	-319.411	24.8143	1845.69	-307.285	24.8564	1938.7	-305.45	20.4061	1861.37	-271.99	20.0522	1976.23	-346.145	29.0005	2252.35	-306.788	16.2997	1953.92
18	-338.496	26.9262	1902.6	-318.858	8.02799	2230.52	-267.394	-23.5863	1968.54	-325.091	26.423	1950.51	-314.323	26.2185	2054.48	-311.863	20.2391	1968.29	-280.044	21.8295	2084.64	-348.421	31.1157	2351.6	-313.061	17.1492	2063.9
19	-344.649	33.1253	2008.71	-325.462	6.27238	2344.76	-271.44	-29.988	2083.57	-329.918	28.2392	2057.06	-321.196	28.706	2167.13	-316.61	19.6221	2071.47	-285.8	23.5762	2188.44	-347.129	32.7726	2444.85	-317.776	17.7907	2170.75
20	-349.859	37.6816	2112.1	-330.658	5.09671	2453.53	-273.928	-35.3961	2195.7	-332.325	29.5333	2166.26	-326.01	32.39	2279.04	-320.696	19.3374	2171.16	-288.392	24.545	2291.54	-343.452	33.9114	2535.88	-320.665	18.3874	2275.65
21	-354.472	41.4017	2214.3	-333.788	4.7921	2554.13	-275.04	-39.3678	2304.58	-331.718	29.9231	2276.98	-328.165	36.2554	2389.67	-324.189	19.4067	2268.02	-287.451	24.5005	2395.86	-338.521	34.4833	2628.14	-321.668	18.9244	2378.96
22	-357.733	44.6337	2315.4	-334.695	5.05337	2648	-274.787	-42.1724	2410.2	-329.395	29.7014	2384.16	-327.617	38.8245	2497.27	-326.755	19.5277	2362.87	-283.571	24.2005	2499.54	-332.812	34.5753	2721.06	-320.921	19.293	2479.81
23	-358.13	47.4119	2414.47	-333.557	5.16797	2739.37	-273.158	-44.1613	2512.63	-326.874	29.2384	2482.29	-324.422	38.8589	2600.21	-328.102	19.448	2456.54	-277.458	24.5166	2600.24	-326.353	34.3669	2811.39	-318.507	19.3559	2577.14
24	-354.185	49.7635	2510.6	-330.557	4.43412	2832.43	-270.091	-45.6895	2611.97	-325.157	28.8668	2568.52	-319.421	36.974	2698.02	-328.274	19.3073	2549.75	-269.87	25.9218	2696.09	-319.158	34.0398	2895.86	-314.589	19.2022	2670.41
25	-345.999	51.6675	2603.41	-325.779	2.79887	2927.97	-265.379	-47.1226	2708.56	-323.838	28.8157	2647.37	-313.815	34.6447	2790.77	-327.468	19.4268	2643.23	-261.711	27.7876	2786.51	-311.067	33.7866	2973.73	-309.382	18.9756	2760.19
26	-335.625	53.0433	2693.21	-319.18	1.01039	3022.58	-258.789	-48.8281	2802.73	-322.266	29.2969	2724.61	-308.603	33.2269	2878.62	-325.837	20.1104	2737.37	-253.906	29.2969	2871.09	-301.706	33.8133	3047.39	-303.239	18.8712	2847.2
27	-325.236	53.8075	2780.35	-310.714	-0.135483	3112.6	-250.284	-50.9687	2894.87	-319.919	30.4437	2804.68	-303.053	33.0266	2962.63	-323.124	21.5049	2829.87	-246.974	29.8481	2949.86	-290.69	34.3264	3119.39	-296.249	18.9816	2931.78
28	-316.098	53.9855	2865.44	-300.592	-0.266954	3195.84	-240.609	-52.8881	2985.41	-316.793	32.0779	2886.69	-295.561	33.8205	3044.33	-318.871	23.6776	2917.07	-239.79	29.702	3024.35	-277.923	35.4369	3191.12	-288.279	19.4432	3013.78
29	-307.431	53.8511	2949.69	-289.615	0.024307	3273.51	-230.7	-53.7253	3074.82	-313.012	33.9431	2968.43	-284.752	35.3593	3125.01	-312.615	26.6535	2995.78	-230.816	29.3346	3096.52	-263.97	37.0385	3261.23	-279.114	20.3099	3093.12
30	-298.172	53.712	3034.36	-278.663	0.01355	3347.28	-221.214	-52.8445	3163.04	-308.598	35.7951	3047.83	-271.478	37.1872	3203.9	-303.897	30.0615	3067.03	-218.843	29.1549	3168.11	-249.492	38.995	3328	-268.795	21.5093	3169.94
31	-287.468	53.7882	3119.98	-268.225	-0.860763	3418.37	-211.149	-50.9256	3247.03	-302.962	37.4619	3123.83	-257.81	38.7351	3279.04	-292.259	33.3141	3134.22	-204.558	29.1777	3239.82	-234.97	41.1101	3390.1	-257.425	22.7251	3244.05
32	-275.398	53.9118	3203.75	-257.046	-2.44095	3486.07	-198.903	-49.1245	3322.71	-295.297	38.7975	3195.67	-245.573	39.4879	3348.72	-277.337	35.8653	3200.47	-189.337	29.2756	3311.95	-220.118	42.9219	3447.87	-244.876	23.5868	3314.65
33	-262.296	53.8082	3281.96	-243.394	-4.37129	3549.1	-183.1	-48.4541	3386.68	-284.936	39.6577	3262.76	-233.885	39.5026	3413.58	-259.771	37.6263	3266	-174.382	29.3323	3384.54	-204.437	43.8955	3502.1	-230.775	23.8746	3380.84
34	-248.458	53.275	3351.35	-225.769	-6.30837	3606.4	-164.345	-48.6779	3442.01	-272.431	39.9145	3325.79	-220.254	39.1771	3475.66	-240.798	38.7804	3329.28	-159.388	29.3309	3455.57	-187.436	43.5685	3553.46	-214.86	23.6325	3442.44
35	-233.802	52.7589	3412.83	-204.75	-8.01904	3658.68	-144.26	-48.9159	3495.03	-258.963	39.4482	3386.05	-202.423	38.8943	3536.83	-221.583	39.5494	3388.78	-143.273	29.3055	3521.9	-168.676	42.1269	3601.18	-197.216	23.1435	3500.16
36	-218.055	53.0474	3469.48	-182.015	-9.3282	3707.55	-124.367	-48.3377	3551.63	-245.587	38.1695	3444.7	-181.133	38.8145	3596.55	-202.405	40.5618	3443.01	-125.036	29.289	3580.63	-147.746	40.0977	3643.78	-178.293	22.7892	3554.67
37	-200.943	54.8871	3524.32	-159.194	-10.0694	3754.59	-104.686	-46.8587	3610.8	-231.591	36.4001	3500.74	-159.059	38.9544	3652.74	-182.971	42.7086	3490.53	-104.86	29.2889	3632.06	-124.276	38.0026	3679.84	-158.448	22.9142	3605.7
38	-182.28	58.0785	3577.96	-136.781	-10.2504	3799.66	-84.16	-44.9316	3666.63	-214.988	34.7579	3551.57	-138.707	39.3078	3703.36	-162.988	46.775	3530.08	-83.7859	29.295	3678.77	-98.7132	36.1822	3709.5	-137.8	23.6518	3652.19
39	-161.962	61.5152	3628.75	-114.172	-10.0456	3841.04	-61.7461	-43.0113	3713.3	-193.866	33.8449	3594.67	-119.954	39.6043	3747.62	-142.318	52.1184	3562.97	-62.8229	29.2967	3723.26	-72.2907	34.8031	3734.36	-116.142	24.7657	3693.25
40	-139.893	64.0635	3674.95	-90.727	-9.63699	3876.95	-37.2913	-41.3233	3749.94	-168.737	33.7441	3629.45	-100.84	39.3887	3785.59	-120.932	57.0969	3592.27	-41.8888	29.2929	3765.07	-46.2673	34.0233	3756.07	-93.3221	25.8311	3728.79
41	-116.24	65.3778	3715.55	-66.0304	-9.25459	3906.3	-11.5331	-39.8642	3780.68	-142.531	34.0198	3657.32	-79.4814	38.2473	3817.31	-98.8185	60.1673	3620.89	-19.8084	29.2921	3800.75	-21.3718	33.8448	3775.14	-69.4768	26.4788	3759.24
42	-91.6358	66.4836	3750.81	-40.0656	-9.21215	3929.29	14.7601	-38.6171	3809.79	-118.234	34.2199	3679.73	-55.6584	36.4326	3842.65	-76.2054	61.5231	3648.64	4.61327	29.3025	3826.81	2.58996	33.9983	3790.09	-44.9794	26.7664	3784.73
43	-66.7594	68.5436	3781.11	-12.8559	-9.83182	3946.23	41.1697	-37.4068	3838.36	-96.6507	34.1738	3697.79	-30.411	34.7012	3861.34	-53.5027	62.6738	3672.98	31.323	29.3197	3842.73	25.9043	34.1872	3799.21	-20.2228	27.0451	3804.97
44	-42.1537	72.3081	3806.8	15.2937	-11.2511	3957.48	67.763	-35.8383	3863.09	-75.5599	34.1014	3712.09	-4.77069	33.7817	3873.13	-31.093	65.0697	3691.43	58.5358	29.3209	3852.18	48.8239	34.2054	3801.48	4.6049	27.7122	3819.71
45	-17.9152	77.1675	3828.11	43.149	-12.9981	3963.55	94.6413	-33.5036	3880.39	-52.5274	34.2497	3723.21	20.8891	33.7298	3878.49	-8.839	68.6441	3703.37	84.3483	29.2824	3859.13	71.4913	34.1451	3798.06	29.4047	28.8396	3829.29
46	5.95131	82.2318	3845.27	69.2841	-14.4756	3965.01	121.685	-30.3436	3888.57	-26.5032	34.6178	3730.95	46.7349	34.0498	3878.46	13.8227	72.086	3709.68	107.973	29.2157	3865.41	94.026	34.1599	3790.55	54.1217	30.1927	3834.24
47	29.5103	86.677	3858.33	92.5476	-15.1769	3962.25	148.349	-26.9784	3889.65	0.875789	34.7239	3733.65	72.9249	34.2495	3874.03	37.43	74.1029	3711.23	130.788	29.2001	3868.78	116.546	34.3571	3780.28	78.6214	31.3944	3834.78
48	53.2772	90.1083	3866.44	113.58	-15.1851	3954.88	174.036	-24.1054	3886.1	27.6645	34.0315	3729.52	99.1644	34.2112	3864.7	61.8041	74.4354	3707.87	154.421	29.3226	3866.5	139.164	34.5408	3766.75	102.889	32.1699	3830.34
49	77.9486	92.3032	3868.36	133.74	-14.8208	3942.1	198.377	-22.1487	3879.24	52.504	32.3526	3717.82	124.756	34.15	3848.65	86.1295	73.7419	3698.47	179.709	29.5732	3856.78	161.986	34.3935	3748.7	126.894	32.4431	3820.01
50	104.155	93.0829	3862.97	154.319	-14.4001	3923.23	221.625	-20.7774	3867.21	75.6552	30.4614	3700.91	149.017	34.2785	3824.15	109.603	72.6888	3681.97	205.306	29.673	3840.34	185.096	33.6188	3724.93	150.597	32.3282	3803.22
51	131.58	92.8839	3850.46	175.572	-14.1646	3898.39	244.141	-19.5312	3847.66	97.6562	29.2969	3681.64	171.886	34.5056	3792.5	132.157	71.429	3658.59	229.492	29.2969	3818.36	208.216	32.2279	3694.87	173.837	31.993	3780.31
52	159.202	92.5999	3832.04	196.986	-14.3011	3868.33	266.243	-18.0572	3819.12	119.081	29.4251	3661.76	193.894	34.4488	3757.85	154.431	69.6219	3629.76	251.07	28.2163	3791.81	230.801	30.4605	3658.39	196.464	31.5518	3752.38
53	185.991	93.1111	3808.93	218.033	-14.9913	3833.81	288.089	-16.4311	3783.89	140.647	29.9199	3638.51	215.58	33.7268	3724.32	177.067	66.928	3596.96	270.929	26.5875	3760.85	252.307	28.5617	3615.4	218.58	30.9266	3720.33
54	211.328	94.2593	3781.75	238.357	-16.2646	3795.04	309.791	-14.8365	3745.16	163.108	29.4819	3608.03	237.001	32.2836	3691.77	200.024	63.5304	3560.62	290.477	24.6629	3725.44	272.558	26.762	3566.54	240.331	29.9849	3684.29
55	235.139	94.4909	3750.38	257.834	-17.9455	3751.52	331.362	-13.4054	3705.48	186.95	27.1108	3567.22	257.718	30.4017	3655.69	222.55	60.1557	3520.14	310.851	22.6975	3685.44	291.876	25.272	3513.41	261.785	28.5972	3643.66
56	257.388	92.1571	3714.63	276.356	-19.8443	3702.68	352.202	-11.9731	3663.49	211.106	23.5519	3517.46	277.277	28.3785	3611.42	243.862	57.536	3474.92	331.591	20.961	3640.06	310.614	24.301	3457.7	282.55	26.8835	3597.79
57	278.13	86.6063	3674.23	293.866	-21.7429	3648.49	371.492	-10.2669	3616.41	233.945	20.1825	3461.76	295.545	26.4919	3557.4	263.221	55.8202	3425.1	351.656	19.7284	3588.28	328.811	23.9498	3400.3	302.083	25.0962	3546.5
58	297.635	79.6691	3628.75	310.437	-23.3529	3590.23	388.559	-8.02972	3561.81	254.018	18.2575	3402.9	312.749	24.9975	3495.47	279.933	54.5014	3371.74	370.071	19.2279	3529.32	345.719	24.0492	3340.13	319.89	23.665	3490.04
59	316.209	73.5561	3577.71	326.161	-24.3753	3529.37	403.989	-5.13905	3500.27	271.472	17.9602	3341.47	329.122	24.1431	3427.67	293.35	53.0489	3315.91	386.417	19.2788	3464.34	360.471	24.3889	3275.81	335.899	22.8577	3429.07
60	334.074	70.0284	3521	341.082	-24.6219	3466.93	419.019	-1.54184	3433.9	287.271	18.9221	3277.01	344.573	23.9537	3355.48	304.192	51.322	3257.48	400.562	19.4905	3395.5	372.505	24.7542	3206.21	350.41	22.7884	3364.19
61	351.039	68.6668	3460.17	355.01	-24.4427	3401.73	434.747	2.79264	3364.67	302.338	20.7507	3209.07	358.61	24.1827	3279.73	314.847	49.6554	3194.91	412.408	19.5	3324.83	382.74	24.9107	3131.3	363.967	23.252	3295.8
62	366.792	68.3907	3397.26	367.686	-24.3509	3331.94	450.36	7.59951	3292.32	316.864	22.7928	3137.98	370.73	24.5674	3201.2	327.748	48.3991	3126.62	422.255	19.3464	3252.05	392.546	24.6177	3051.42	376.873	23.9203	3223.85
63	381.043	68.1537	3334.07	378.868	-24.8288	3255.84	463.662	12.4008	3214.97	330.519	24.2068	3064.61	380.957	24.8479	3119.92	343.096	47.3803	3052.15	430.693	19.3584	3175.26	403.091	23.6668	2966.97	388.991	24.3982	3147.98
64	393.733	67.2509	3269.65	388.518	-26.0482	3173.26	472.512	16.7229	3130.8	342.958	24.183	2989.76	390.009	24.7686	3034.96	358.143	45.7352	2972.62	438.3	19.8445	3092.62	413.548	22.1711	2879.27	399.715	24.3285	3067.87
65	404.933	65.174	3201.51	396.709	-28.003	3084.82	476.749	20.3037	3039.67	353.726	22.7363	2912.35	398.634	24.0782	2945.32	369.977	42.5693	2889.21	445.205	20.4983	3004	421.937	20.4286	2790.12	408.484	23.4732	2983.38
66	414.718	61.4521	3127.21	403.515	-30.6759	2991.21	478.189	23.0922	2943.17	362.262	20.7067	2829.42	406.697	22.7153	2850.84	377.598	37.8033	2802.22	451.091	20.3981	2911.07	426.348	18.7323	2701.24	415.052	21.778	2894.55
67	423.133	56.4892	3045.95	408.953	-33.8285	2893.22	478.715	25.0526	2842.92	368.018	18.9556	2737.99	412.799	20.8903	2752.59	382.737	32.5227	2710.64	455.62	18.6175	2815.52	426.849	17.1932	2611.55	419.603	19.4866	2801.3
68	430.196	51.6021	2958.68	412.984	-36.9919	2791.78	479.216	26.4245	2739.56	371.329	17.7026	2637.71	415.466	18.8356	2651.68	387.312	27.8917	2613.37	458.51	15.2198	2717.92	425.577	15.7328	2517.05	422.574	17.0522	2703.47
69	435.92	48.1423	2866.38	415.564	-39.6881	2687.82	479.208	27.8299	2632.32	373.752	16.2759	2531.94	414.541	16.8395	2548.28	391.912	24.4052	2510.15	459.547	11.642	2617.25	424.749	14.264	2413.66	424.399	14.9638	2600.97
70	440.273	46.5639	2769.83	416.696	-41.6514	2581.69	478.105	29.9153	2520.35	376.923	13.9432	2424.26	411.907	15.2772	2441.06	395.056	21.521	2401.97	458.525	9.4145	2512.4	425.043	12.7435	2299.93	425.316	13.4659	2493.93
71	443.129	45.6171	2669.27	416.466	-43.0186	2472.58	475.342	32.9216	2403.63	381.274	10.555	2315.95	409.603	14.5265	2328.55	395.101	18.6119	2289.93	455.37	9.15341	2402.25	424.215	11.2119	2179.5	425.063	12.4474	2382.71
72	444.348	43.8613	2564.94	414.972	-43.9714	2359.57	470.396	36.301	2283.77	384.892	7.0947	2203.81	408.061	14.5826	2209.99	391.144	15.3761	2175.06	450.256	9.69889	2285.74	419.692	9.71856	2056.59	422.97	11.5827	2267.43
73	443.758	40.2873	2456.97	412.069	-44.6132	2242.09	462.745	39.4157	2162.57	385.597	4.67475	2084.11	405.006	14.7975	2085.78	383.535	12.059	2058.28	443.388	9.68783	2161.8	409.73	8.28381	1934.22	418.229	10.5741	2148.23
74	441.05	35.4511	2345.3	406.74	-44.7609	2120.85	451.944	41.7741	2040.83	381.808	3.94783	1955.31	397.924	14.4653	1956.44	372.747	8.95561	1940.47	434.779	8.32387	2030.43	395.595	6.82079	1811.13	410.323	9.37221	2025.09
75	435.883	30.2643	2229.83	397.768	-44.1669	1996.88	437.742	43.2897	1916.51	373.599	4.29579	1821.91	385.71	13.2297	1822.81	359.368	6.07768	1821.37	423.905	6.37636	1894.6	379.235	5.21842	1685.08	399.151	8.07313	1898.62
76	427.927	25.5185	2110.47	384.155	-42.6757	1870.97	419.922	43.9453	1787.11	361.328	4.88281	1689.45	369.837	11.3724	1686.36	344.203	2.92039	1698.6	410.156	4.88281	1757.81	362.277	3.40982	1554	384.976	6.78204	1769.35
77	416.905	21.1374	1987.37	366.482	-40.8008	1742.42	398.375	43.8444	1650.64	345.418	5.06407	1561.73	352.045	9.24335	1548.59	328.073	-1.07258	1569.58	393.075	4.56346	1622.74	344.021	1.64821	1416.89	368.049	5.45344	1637.49
78	402.567	16.663	1860.74	346.019	-39.3503	1609.85	373.419	43.5734	1507.11	326.554	4.95852	1435.5	333.131	7.19649	1409.8	311.024	-6.00842	1433.52	372.831	4.86946	1488.84	322.739	0.327722	1273.24	348.536	4.02872	1502.32
79	384.686	11.6521	1730.83	323.989	-39.0663	1471.86	345.478	43.8391	1357.08	305.486	4.87606	1305.77	312.012	5.59423	1267.89	291.564	-11.1035	1293.17	349.748	4.93472	1354.74	296.781	-0.189173	1122.82	326.218	2.56715	1363.02
80	363.415	5.93354	1598.29	300.73	-39.608	1326.45	314.872	45.1703	1201.47	282.826	5.0469	1168.23	287.39	4.79817	1120.52	268.023	-15.4722	1151.68	324.039	4.04645	1218.59	265.724	-0.062366	969.746	300.877	1.23161	1219.37
81	339.214	-0.444127	1464.03	275.867	-39.7568	1171.11	281.302	47.0538	1043.63	258.387	5.2359	1022.44	258.431	4.8464	968.319	239.702	-18.7449	1010.82	295.256	2.38705	1075.71	230.146	0.125206	821.671	272.288	0.0878156	1072.22
82	312.551	-7.42454	1328.98	248.995	-38.2901	1003.52	244.245	48.599	887.771	231.692	5.03947	869.37	225.305	5.07928	818.442	207.985	-21.6654	869.329	262.711	0.462971	920.361	190.678	-0.215349	686.328	240.52	-1.05183	923.013
83	283.757	-14.8802	1192.13	219.31	-35.0584	830.733	203.402	48.9763	738.612	202.311	4.10646	711.481	188.315	4.74765	678.874	174.525	-25.1212	725.594	225.869	-1.26869	749.473	149.126	-1.3516	570.155	205.827	-2.48121	774.631
84	252.965	-22.5794	1049.7	185.423	-31.4837	673.542	160.396	47.8864	605.282	170.229	2.54423	564.245	148.566	3.45021	557.121	140.902	-29.6064	583.93	185.51	-2.78435	583.022	109.02	-3.08081	477.698	169.126	-4.45675	636.817
85	220.292	-30.2822	897.683	145.904	-29.1117	553.817	117.844	45.3036	499.185	135.644	0.696203	449.831	109.048	1.60255	459.563	108.509	-34.6928	462.581	143.092	-4.28366	452.858	74.0238	-5.16279	413.345	131.795	-6.99136	523.608
86	185.81	-37.4227	738.31	101.541	-28.773	482.503	78.4032	41.2454	430.419	98.9701	-1.10701	388.241	73.0183	-0.263136	392.403	78.7151	-39.819	381.764	100.239	-5.94773	387.943	46.8259	-7.29355	376.058	95.4404	-9.92259	447.205
87	149.477	-42.5471	590.771	59.1921	-29.3454	440.706	45.1978	36.2864	391.118	63.5128	-2.73537	369.387	43.2674	-1.83156	355.175	53.1354	-44.1098	348.793	60.7448	-7.68119	376.708	27.4416	-8.99514	349.987	62.7461	-12.6199	402.831
88	111.228	-44.0514	477.13	26.7374	-29.3765	404.488	21.686	31.4027	360.47	34.6625	-4.2034	361.486	21.3864	-3.34268	330.345	34.0185	-45.8874	337.972	29.9666	-9.18942	378.371	15.435	-9.76012	316.774	36.89	-14.301	370.88
89	71.7739	-40.9171	413.471	10.2897	-27.687	354.203	11.1184	27.5372	318.095	17.6256	-5.51413	333.337	8.77612	-5.12373	297.694	23.7101	-43.3488	318.41	13.0448	-10.1803	352.876	10.0805	-9.20778	262.363	20.8024	-14.3052	331.306
90	35.9791	-35.2628	383.832	6.48362	-24.5607	293.209	11.7839	24.6641	260.171	12.307	-6.33371	278.057	5.42061	-7.24365	245.412	22.7226	-35.9467	270.916	9.3191	-10.5217	291.668	9.10001	-7.63596	195.735	14.1395	-12.8551	277.375
91	10.0895	-30.2528	361.571	8.79372	-20.7689	232.529	17.0098	21.7893	199.43	13.3107	-5.99137	213.088	7.34804	-9.04993	185.164	26.4471	-26.641	208.978	12.3292	-10.2413	217.694	9.69784	-5.56876	133.548	13.1282	-10.8406	219
92	-0.403172	-28.7676	322.18	11.0708	-17.0492	182.481	19.9947	17.905	149.158	15.0661	-3.82323	156.702	9.90188	-9.76529	132.679	29.3881	-18.9984	151.742	15.433	-9.37474	154.97	9.28228	-3.5113	91.1811	13.7167	-9.1731	167.637
93	1.53837	-30.5048	265.118	11.3951	-13.7562	145.414	17.8602	13.2917	114.959	14.5413	-0.140506	116.952	9.74062	-8.92635	98.3455	27.6123	-15.3975	113.448	15.1775	-8.00791	113.948	7.5458	-1.75545	69.6337	13.1764	-8.14964	129.727
94	7.65149	-33.1669	204.868	10.4978	-11.0046	118.679	13.1723	10.018	91.7831	12.2261	3.39249	87.7093	7.5357	-7.02771	76.2487	21.9521	-14.5905	93.3633	12.5343	-6.29625	86.2543	5.61281	-0.459325	60.8916	11.3978	-7.39185	102.475
95	9.7882	-34.4618	155.8	9.13854	-8.89859	99.538	8.88741	10.2685	73.8113	8.8699	5.02043	61.8337	4.72123	-4.74606	57.3764	14.1463	-14.6403	87.9106	8.79919	-4.40066	62.1675	4.59808	0.227661	56.9038	8.6186	-6.45385	81.9177
96	5.53144	-33.159	122.201	7.70705	-7.33851	84.8499	6.6677	14.2973	57.1535	5.20926	4.03874	35.8386	2.44108	-2.65866	35.6156	5.92561	-13.9886	92.006	5.03604	-2.52063	36.6563	4.69112	0.34966	52.5989	5.40116	-5.12247	64.615
97	-1.03322	-29.2321	96.9197	6.17351	-5.99382	71.0169	5.6623	18.6101	41.6652	1.95573	1.78347	13.3383	0.870495	-1.01101	14.5292	-1.00394	-12.3417	95.5417	1.85842	-0.930677	13.7977	5.03163	0.170482	46.2863	2.43937	-3.61815	49.1369
98	-5.48216	-22.7236	72.2125	4.4861	-4.52285	54.4325	4.73219	19.2845	27.6323	-0.182419	-0.175603	-1.24008	-0.017124	0.020511	-0.303902	-4.94181	-9.66927	87.3631	-0.172226	0.086266	-1.2882	4.70583	-0.034867	36.468	0.391047	-2.21686	34.4095
99	-5.44424	-14.3154	44.4243	2.70168	-2.80287	34.0703	3.1563	14.2447	15.4745	-0.830403	-0.799373	-5.64506	-0.293632	0.351707	-5.21094	-4.90269	-6.12983	60.9929	-0.784	0.392699	-5.86412	3.30668	-0.096002	23.2081	-0.386287	-1.1443	20.1812
100	-2.80991	-6.01623	18.39	1.10279	-1.16577	14.2606	1.3684	6.51659	5.97991	-0.53481	-0.514824	-3.63562	-0.196265	0.235084	-3.48288	-2.51411	-2.5715	27.0365	-0.504924	0.252912	-3.7767	1.47938	-0.059757	9.8149	-0.326181	-0.415437	8.07333
101	0	0	0	0	0	0	0	0	0	0	0	0	0	0	0	0	0	0	0	0	0	0	0	0	0	0	0
